# Supplementary material for: Effect of aberrant fructose metabolism following SARS-CoV-2 infection on colorectal cancer patients’ poor prognosis
Source: PubMed Central journal article supplement (PMC11463760; doi:10.1371/journal.pcbi.1012412), 2024-09-27
Supplement: pcbi.1012412.s001.pdf [file pcbi.1012412.s001.pdf]

Table S1

| gene     | HR          | z            | pvalue      | lower       | upper       |
|----------|-------------|--------------|-------------|-------------|-------------|
| DLAT     | 0.710999462 | -3.779482339 | 0.000157155 | 0.595732972 | 0.8485685   |
| PMM2     | 0.670847965 | -3.692514736 | 0.000222047 | 0.542746779 | 0.829184086 |
| TIMP1    | 1.423551734 | 3.498708447  | 0.000467517 | 1.168030289 | 1.734971737 |
| FDFT1    | 0.722140084 | -3.358560417 | 0.000783496 | 0.597195874 | 0.873224888 |
| CTNNB1   | 0.754347118 | -3.018853068 | 0.002537336 | 0.628181916 | 0.90585157  |
| AOC3     | 1.313686551 | 2.998538176  | 0.002712782 | 1.099109152 | 1.570155569 |
| CLU      | 1.286604789 | 2.905767217  | 0.003663539 | 1.085484176 | 1.524989419 |
| FTCD     | 1.105849777 | 2.628056308  | 0.00858743  | 1.025907558 | 1.192021366 |
| PFKFB1   | 1.153612816 | 2.627419111  | 0.008603529 | 1.036968108 | 1.283378455 |
| MAPK1    | 0.823847808 | -2.547071437 | 0.010863119 | 0.709727277 | 0.956318339 |
| ALDH3B1  | 1.275516517 | 2.485516505  | 0.012936359 | 1.052802482 | 1.545344368 |
| SLC25A24 | 0.80272543  | -2.365903759 | 0.017986119 | 0.669126689 | 0.962998676 |
| UQCRC2   | 0.804865608 | -2.356766942 | 0.018434813 | 0.671923548 | 0.964110648 |
| GNMT     | 1.122755374 | 2.272877499  | 0.023033563 | 1.016068292 | 1.240644591 |
| HSPA9    | 0.80444463  | -2.257453132 | 0.023979775 | 0.665956885 | 0.97173132  |
| PTPRD    | 0.800334413 | -2.254445978 | 0.024168126 | 0.659444011 | 0.971326089 |
| GATM     | 1.197160827 | 2.232215289  | 0.025600737 | 1.0221905   | 1.402081165 |
| SERPINE1 | 1.219225293 | 2.228353932  | 0.025856923 | 1.024160974 | 1.45144206  |
| IGF1     | 1.202600594 | 2.223755196  | 0.026164919 | 1.022125774 | 1.414941513 |
| IL7      | 0.796090744 | -2.197594324 | 0.027978028 | 0.649582426 | 0.975642885 |
| LCAT     | 1.189459003 | 2.182946966  | 0.029039716 | 1.017880454 | 1.38995961  |
| COG2     | 0.811006807 | -2.180361109 | 0.029230705 | 0.671807832 | 0.979047892 |
| STAT3    | 0.819194117 | -2.127009271 | 0.033419313 | 0.681672604 | 0.984459398 |
| CLEC4A   | 0.694902519 | -2.123262046 | 0.033731899 | 0.49659833  | 0.972394551 |
| GPI      | 0.819556045 | -2.078221297 | 0.037688981 | 0.679320877 | 0.98874057  |
| AASS     | 1.212171664 | 2.048351913  | 0.04052553  | 1.008337352 | 1.457210863 |
| SDHB     | 0.829373266 | -2.011671922 | 0.044254532 | 0.691175779 | 0.995202719 |
| HARS2    | 0.826649905 | -2.001422009 | 0.045346931 | 0.686050151 | 0.996064304 |
| DDAH1    | 0.821645281 | -1.996474443 | 0.045882305 | 0.677530635 | 0.996413937 |
| PLIN1    | 1.176309899 | 1.993451205  | 0.046212062 | 1.002731522 | 1.379935654 |
| GNAO1    | 1.180577842 | 1.952362845  | 0.050895141 | 0.999353905 | 1.394665128 |
| UBE2Q1   | 1.214873823 | 1.951215167  | 0.051031456 | 0.999127657 | 1.477207038 |
| ACLY     | 0.825427534 | -1.931807452 | 0.053383276 | 0.679428061 | 1.002800226 |
| INSR     | 1.207111014 | 1.899090481  | 0.05755258  | 0.993984638 | 1.465935131 |
| CS       | 0.8397969   | -1.867946784 | 0.061769489 | 0.699219082 | 1.008637853 |
| PYGL     | 1.195578219 | 1.850225727  | 0.064281022 | 0.989461252 | 1.44463189  |
| ADSL     | 0.811652223 | -1.838472093 | 0.06599287  | 0.649756831 | 1.013885963 |
| CDKN1B   | 0.841248413 | -1.825257772 | 0.067962139 | 0.698727499 | 1.012839616 |
| LMNA     | 1.211100123 | 1.815018854  | 0.069521012 | 0.984821102 | 1.489370512 |
| PRKACA   | 1.24491712  | 1.812754782  | 0.069869651 | 0.982367276 | 1.577636668 |
| SRSF3    | 0.84720107  | -1.795835328 | 0.07252071  | 0.706954374 | 1.015270122 |
| FCGRIA   | 1.170382797 | 1.795310103  | 0.072604306 | 0.985674265 | 1.389704431 |
| RPL31    | 1.203976369 | 1.785485611  | 0.074182583 | 0.982023725 | 1.476093766 |
| AGXT     | 1.095340264 | 1.772608718  | 0.076293566 | 0.990421083 | 1.211373943 |
| LBR      | 0.849283181 | -1.769304629 | 0.076843051 | 0.708695676 | 1.017759731 |
| ACACB    | 1.186860199 | 1.763067553  | 0.077889097 | 0.981050088 | 1.435846293 |
| XDH      | 0.841786218 | -1.742849067 | 0.081359983 | 0.693562589 | 1.021687224 |
| ATPIA1   | 0.852819009 | -1.740331362 | 0.08180085  | 0.712832955 | 1.020295507 |
| AKR1C2   | 1.151076512 | 1.705426407  | 0.088114927 | 0.979219612 | 1.353094975 |
| MAPK14   | 0.850201344 | -1.705121832 | 0.088171705 | 0.705521288 | 1.024550695 |
| CYTH2    | 1.159620246 | 1.696981452  | 0.089700167 | 0.977311327 | 1.375937306 |
| DBN1     | 1.166994146 | 1.659429353  | 0.097029306 | 0.972418871 | 1.400502783 |
| OLR1     | 1.171788452 | 1.642301238  | 0.100527591 | 0.969801417 | 1.41584468  |
| SERPINA1 | 0.847538892 | -1.626244009 | 0.103897758 | 0.694347667 | 1.034528102 |
| TTR      | 1.098794275 | 1.617138871  | 0.105848308 | 0.980225365 | 1.231705384 |
| MYC      | 0.85288597  | -1.606555016 | 0.108152017 | 0.702391713 | 1.035625085 |
| PCCA     | 0.848133184 | -1.587168723 | 0.112474436 | 0.692031241 | 1.039447145 |
| SLC26A2  | 0.855396163 | -1.553349646 | 0.120339626 | 0.702389954 | 1.041732718 |
| SLC2A9   | 0.861210637 | -1.548871511 | 0.121412611 | 0.712846269 | 1.040454013 |
| PDZK1    | 1.142264311 | 1.536235508  | 0.12448063  | 0.963976982 | 1.353525843 |
| EZH2     | 0.868320592 | -1.52103183  | 0.12825185  | 0.723877029 | 1.041586652 |
| ACACA    | 0.854823208 | -1.511309423 | 0.130709634 | 0.697475701 | 1.047667633 |
| ANAPC1   | 0.856822558 | -1.504580231 | 0.132432032 | 0.700600118 | 1.047880062 |
| ELN      | 1.160155767 | 1.503952409  | 0.132593621 | 0.955956412 | 1.407973615 |
| SRSF7    | 0.868890478 | -1.490259435 | 0.136156034 | 0.722258878 | 1.045290942 |
| VWF      | 1.15084327  | 1.464264764  | 0.143121621 | 0.953551431 | 1.388955216 |
| HMGCL    | 0.869252463 | -1.454597853 | 0.145780626 | 0.719696734 | 1.049886445 |

|          |             |              |             |             |             |
|----------|-------------|--------------|-------------|-------------|-------------|
| FSCN1    | 1.137284978 | 1.446187859  | 0.148124518 | 0.955326311 | 1.353900867 |
| FECH     | 0.864932354 | -1.444032465 | 0.148729843 | 0.710311644 | 1.053210916 |
| GNAI2    | 1.149410895 | 1.434383244  | 0.151462927 | 0.950256587 | 1.390303866 |
| HNRNPM   | 0.873120953 | -1.425472854 | 0.154020562 | 0.724526466 | 1.052190961 |
| VDAC1    | 0.872094464 | -1.422623987 | 0.154845187 | 0.722232922 | 1.053051905 |
| DCTN1    | 1.161849554 | 1.419392341  | 0.155784664 | 0.944469293 | 1.429262333 |
| CA4      | 0.865916945 | -1.408578632 | 0.158959801 | 0.708724869 | 1.057973536 |
| NOD2     | 0.865199421 | -1.398334342 | 0.16201269  | 0.706278003 | 1.059880153 |
| ERP29    | 1.161396981 | 1.393799737  | 0.163378088 | 0.941032694 | 1.433364597 |
| PNP      | 0.875410539 | -1.393517823 | 0.163463259 | 0.725994627 | 1.055577524 |
| AR       | 1.105388389 | 1.383208057  | 0.16660108  | 0.959081698 | 1.274013978 |
| SETD2    | 0.867214719 | -1.382104157 | 0.166939722 | 0.708571918 | 1.061376199 |
| INPP5K   | 1.14697852  | 1.378876659  | 0.167932786 | 0.943848225 | 1.393825502 |
| PTMA     | 1.152513524 | 1.357162319  | 0.174729641 | 0.938899477 | 1.414728046 |
| CYP2E1   | 1.056227798 | 1.351818851  | 0.176433272 | 0.97569062  | 1.143412818 |
| NR1I3    | 1.081628477 | 1.349633515  | 0.177133568 | 0.965137557 | 1.212179708 |
| SLC35C1  | 1.166794111 | 1.346666641  | 0.178087621 | 0.932158077 | 1.460491018 |
| HNRNPL   | 0.880734625 | -1.346402763 | 0.17817266  | 0.732075403 | 1.0595814   |
| RPSA     | 0.875209274 | -1.34519287  | 0.178562958 | 0.720722684 | 1.062809996 |
| PDHX     | 0.879766981 | -1.342474256 | 0.179442272 | 0.729703528 | 1.060690967 |
| AGER     | 1.13196403  | 1.327440125  | 0.184363134 | 0.94264639  | 1.359303531 |
| LGALS1   | 1.136338499 | 1.327050029  | 0.184492134 | 0.940863316 | 1.3724259   |
| FH       | 0.880521315 | -1.319992185 | 0.186837627 | 0.728933618 | 1.063632911 |
| NR4A1    | 1.132102652 | 1.316662766  | 0.18795169  | 0.941178985 | 1.361756303 |
| SLC26A6  | 0.87886105  | -1.31571839  | 0.18826858  | 0.725071434 | 1.06526986  |
| F5       | 1.120535334 | 1.313624063  | 0.188972747 | 0.945542902 | 1.327913763 |
| PRND     | 1.122683809 | 1.31291369   | 0.189212033 | 0.944563907 | 1.334392438 |
| DECR1    | 0.884570882 | -1.303704139 | 0.192334478 | 0.73561657  | 1.063686814 |
| GK       | 0.873526908 | -1.302111392 | 0.192878309 | 0.712662958 | 1.070701444 |
| SKIV2L   | 1.137054129 | 1.285165174  | 0.198734571 | 0.93478368  | 1.383092282 |
| ATP6V0A1 | 0.882212483 | -1.282729023 | 0.199587028 | 0.728468868 | 1.068403743 |
| PDHA1    | 0.88234801  | -1.279238031 | 0.200813247 | 0.728371549 | 1.068874823 |
| NT5C2    | 0.881921851 | -1.266690065 | 0.205266134 | 0.726095056 | 1.071190536 |
| ALDOB    | 0.881832737 | -1.253574896 | 0.209996561 | 0.724431931 | 1.073432773 |
| MLX      | 0.884916971 | -1.241394953 | 0.214459883 | 0.729575273 | 1.073334137 |
| CYBB     | 0.88342799  | -1.229615297 | 0.218841199 | 0.725053161 | 1.076396954 |
| SOD2     | 0.880867396 | -1.228596933 | 0.219222966 | 0.719493809 | 1.078435087 |
| HNRNPA0  | 0.889136869 | -1.221402418 | 0.221933692 | 0.736341738 | 1.073637867 |
| IGFBP1   | 1.091682602 | 1.220808378  | 0.222158581 | 0.948274354 | 1.256778589 |
| SREBF1   | 1.131232321 | 1.212058412  | 0.225490022 | 0.926735161 | 1.380854659 |
| KRT19    | 1.133570823 | 1.210351484  | 0.22614405  | 0.925290416 | 1.388734594 |
| GMDS     | 0.89062145  | -1.209517282 | 0.226464176 | 0.738198818 | 1.07451617  |
| PGM3     | 0.890227693 | -1.191393295 | 0.233499224 | 0.735233418 | 1.077896253 |
| KLF2     | 1.115847159 | 1.183995595  | 0.236414807 | 0.930680832 | 1.337853794 |
| XYLB     | 0.889294714 | -1.178789149 | 0.238482146 | 0.731685404 | 1.08085399  |
| GNAI1    | 1.123253263 | 1.178030052  | 0.238784626 | 0.925752146 | 1.362889514 |
| COLQ     | 1.107900441 | 1.16274132   | 0.244934471 | 0.932155763 | 1.316779271 |
| LIN7B    | 1.117343615 | 1.157927859  | 0.246893477 | 0.926026798 | 1.34818642  |
| AGL      | 0.888895514 | -1.155950347 | 0.247701467 | 0.727989108 | 1.085366837 |
| MAGED2   | 1.127347191 | 1.149042596  | 0.250538417 | 0.918884627 | 1.38310257  |
| PPARA    | 0.891166733 | -1.139564917 | 0.254467608 | 0.730957687 | 1.086489903 |
| CYP3A4   | 1.075135468 | 1.138307553  | 0.254992081 | 0.949050124 | 1.217971785 |
| RPL35    | 1.134174928 | 1.136208017  | 0.255869516 | 0.912760255 | 1.409299716 |
| RPLP1    | 1.143396363 | 1.134697622  | 0.256502034 | 0.907138131 | 1.441186517 |
| PMM1     | 0.894881891 | -1.121241719 | 0.262184986 | 0.736971611 | 1.086627473 |
| HP       | 1.052646327 | 1.11590494   | 0.264462827 | 0.961935076 | 1.151911722 |
| TJP2     | 0.830122243 | -1.115283127 | 0.264729114 | 0.598473326 | 1.151434674 |
| TRIM21   | 0.896713055 | -1.1147961   | 0.264937808 | 0.740307003 | 1.086163306 |
| PPP2R1B  | 0.899119179 | -1.090906022 | 0.275314237 | 0.74275155  | 1.088406074 |
| MTOR     | 0.899464291 | -1.089927071 | 0.27574527  | 0.743422005 | 1.088259436 |
| MATR3    | 0.719601214 | -1.082260869 | 0.279136628 | 0.396539701 | 1.305861445 |
| RPS14    | 0.895442961 | -1.071174899 | 0.284090796 | 0.731610857 | 1.095962543 |
| TPM3     | 0.904146899 | -1.065166489 | 0.286800596 | 0.751132207 | 1.088332531 |
| RPL28    | 1.120936761 | 1.06390217   | 0.28737302  | 0.908323948 | 1.383316188 |
| CYP2D6   | 1.089873389 | 1.062433351  | 0.288039    | 0.929876289 | 1.277400036 |
| RPL27A   | 1.113607291 | 1.054185776  | 0.291797871 | 0.911689269 | 1.36024547  |
| MPI      | 1.105823951 | 1.049569933  | 0.293915887 | 0.916446025 | 1.334335659 |
| ZNF638   | 1.119157681 | 1.045407498  | 0.295834673 | 0.906208889 | 1.38214702  |
| FOLR1    | 1.097633938 | 1.041697268  | 0.297552056 | 0.921162563 | 1.307912751 |

|          |             |              |             |             |             |
|----------|-------------|--------------|-------------|-------------|-------------|
| NNT      | 0.90010736  | -1.041203462 | 0.297781129 | 0.738342409 | 1.097313726 |
| CFH      | 1.097083738 | 1.032846141  | 0.301675907 | 0.920194019 | 1.307977127 |
| ALDOC    | 1.105891664 | 1.028474473  | 0.303726693 | 0.912871197 | 1.33972501  |
| TXNDC5   | 0.895207874 | -1.026987088 | 0.304426544 | 0.724723857 | 1.105796547 |
| NR1H3    | 1.106677646 | 1.022763624  | 0.306419621 | 0.911300527 | 1.343942394 |
| FGFR1    | 1.102791353 | 1.022181051  | 0.306695218 | 0.914145201 | 1.330367174 |
| EGF      | 0.901710982 | -1.017319806 | 0.309001318 | 0.738754817 | 1.100612378 |
| TAT      | 1.042158123 | 0.998987456  | 0.317800768 | 0.961056116 | 1.1301042   |
| FKTN     | 0.899708525 | -0.996377471 | 0.319066775 | 0.730829422 | 1.107611989 |
| MSR1     | 1.102292318 | 0.982689836  | 0.325760115 | 0.907687428 | 1.338619789 |
| HADHB    | 0.911752258 | -0.978995033 | 0.327582434 | 0.757791349 | 1.096993494 |
| NR1H4    | 1.082827806 | 0.970127068  | 0.331983158 | 0.922016016 | 1.271687298 |
| MYO1C    | 1.105029973 | 0.969975978  | 0.332058466 | 0.903090079 | 1.352125628 |
| IL1RN    | 0.910426816 | -0.955983901 | 0.339080368 | 0.751084807 | 1.103573098 |
| PDE1A    | 1.100617806 | 0.951550679  | 0.341324905 | 0.903390159 | 1.340904086 |
| MLXIPL   | 1.09303451  | 0.94893427   | 0.342654044 | 0.909574004 | 1.313498885 |
| RPS27A   | 1.110627101 | 0.947375027  | 0.343447712 | 0.893912429 | 1.379880755 |
| TSC1     | 1.094961868 | 0.937113183  | 0.348700341 | 0.905724974 | 1.323736815 |
| KPNA6    | 0.914024284 | -0.935098417 | 0.349737582 | 0.757051182 | 1.103545457 |
| TGM2     | 1.092283865 | 0.921073308  | 0.357012155 | 0.905234017 | 1.317984099 |
| HMGCS2   | 0.915284723 | -0.905906004 | 0.364985606 | 0.755755887 | 1.108487725 |
| RPL7     | 1.098829599 | 0.897433258  | 0.369487772 | 0.89441659  | 1.349959851 |
| KNG1     | 1.047918371 | 0.881161018  | 0.378230675 | 0.944306883 | 1.162898346 |
| SLC25A13 | 0.915877338 | -0.878642347 | 0.379595227 | 0.752850649 | 1.114206783 |
| ANKHD1   | 0.874907311 | -0.875459956 | 0.381323689 | 0.648675833 | 1.180039033 |
| EEF1A1   | 0.916998047 | -0.87066018  | 0.383939727 | 0.754492694 | 1.114504388 |
| C3       | 1.08335198  | 0.868527491  | 0.385105629 | 0.90428796  | 1.297873647 |
| LPL      | 0.919082861 | -0.861100298 | 0.389182805 | 0.758482644 | 1.113688378 |
| NR1I2    | 0.924776325 | -0.850890619 | 0.394830117 | 0.772333273 | 1.107308569 |
| GRHPR    | 0.917907152 | -0.84986131  | 0.395402198 | 0.753363603 | 1.118388965 |
| PRKCA    | 0.918272213 | -0.845369698 | 0.397904458 | 0.753566974 | 1.118976662 |
| RETN     | 1.069624721 | 0.842030714  | 0.399770761 | 0.914514301 | 1.25104336  |
| DPAGT1   | 0.92021366  | -0.825944768 | 0.408835424 | 0.755434184 | 1.120935747 |
| CPS1     | 0.918049644 | -0.820190527 | 0.412107502 | 0.748392621 | 1.126167102 |
| MYH10    | 1.084299278 | 0.819344417  | 0.412589937 | 0.893446197 | 1.315921348 |
| PKLR     | 1.078010459 | 0.814260278  | 0.41549586  | 0.899700357 | 1.29165954  |
| SLC9A3R1 | 0.923195778 | -0.813931162 | 0.415684388 | 0.761588797 | 1.119095302 |
| TUBA1A   | 1.080117673 | 0.809800582  | 0.418054798 | 0.896315457 | 1.301611144 |
| AOX1     | 1.065377401 | 0.80783782   | 0.41918395  | 0.913639673 | 1.242315806 |
| RBP4     | 1.077128885 | 0.80734919   | 0.419465331 | 0.899358718 | 1.290037682 |
| RPL21    | 1.085040581 | 0.798966562  | 0.424309801 | 0.888162836 | 1.325559925 |
| SLC37A4  | 0.927154057 | -0.790813474 | 0.429052846 | 0.768671337 | 1.118312346 |
| ACSS3    | 0.923200391 | -0.790297226 | 0.429354207 | 0.757231776 | 1.125545691 |
| HNRNPK   | 0.925678632 | -0.786661736 | 0.431479909 | 0.763653035 | 1.122081482 |
| RPL8     | 1.094466399 | 0.784954923  | 0.432479998 | 0.873609558 | 1.371157959 |
| FHIT     | 0.931918301 | -0.784189062 | 0.432929182 | 0.781344043 | 1.111510004 |
| PPARG    | 0.927135271 | -0.779034656 | 0.4359593   | 0.766441178 | 1.121520915 |
| RPS19    | 1.090213759 | 0.777951606  | 0.436597544 | 0.877011195 | 1.355246145 |
| NR2C1    | 0.926322305 | -0.775003237 | 0.438337747 | 0.763315975 | 1.124138682 |
| INVS     | 0.924241141 | -0.759917873 | 0.447303677 | 0.754291933 | 1.132481537 |
| NCL      | 1.082573785 | 0.746787092  | 0.455192088 | 0.879068666 | 1.333190507 |
| CTNS     | 1.073560518 | 0.741702323  | 0.458267712 | 0.889952391 | 1.29504926  |
| SLC2A10  | 1.071966052 | 0.740413506  | 0.459049126 | 0.891842562 | 1.288468688 |
| AGT      | 0.934229326 | -0.727003915 | 0.467223557 | 0.777674195 | 1.12230088  |
| TBP      | 0.931352562 | -0.725623792 | 0.468069431 | 0.768579914 | 1.128597793 |
| IDH1     | 0.93161205  | -0.723829865 | 0.469170192 | 0.769007989 | 1.128598174 |
| EPM2A    | 0.915333469 | -0.712966246 | 0.475866644 | 0.717728    | 1.167343839 |
| ANXA2    | 1.070868383 | 0.711744066  | 0.476623275 | 0.886850413 | 1.293069357 |
| ADPRH    | 1.070566382 | 0.711483734  | 0.476784527 | 0.887228245 | 1.291789779 |
| KITLG    | 0.930934673 | -0.710534448 | 0.477372777 | 0.764160908 | 1.134105861 |
| EWSR1    | 0.93317528  | -0.705277519 | 0.480637548 | 0.770000709 | 1.130928962 |
| EPAS1    | 0.93836502  | -0.704990729 | 0.480816006 | 0.78625229  | 1.119906322 |
| NR5A2    | 0.936061257 | -0.700813175 | 0.483419615 | 0.778127803 | 1.126049826 |
| TCF7L2   | 0.930042394 | -0.68135338  | 0.495647915 | 0.754915837 | 1.145795085 |
| TF       | 1.034403274 | 0.67420935   | 0.500178226 | 0.937530859 | 1.141285243 |
| KAT5     | 0.934541872 | -0.673568314 | 0.500585804 | 0.767443478 | 1.138023237 |
| LIPG     | 0.937965801 | -0.671319968 | 0.502016716 | 0.778009829 | 1.130808136 |
| ETFDH    | 0.939383611 | -0.662754716 | 0.50748766  | 0.780785145 | 1.130197691 |
| POMT2    | 1.066569279 | 0.654303526  | 0.512916274 | 0.879321932 | 1.293690042 |

|         |             |              |             |             |             |
|---------|-------------|--------------|-------------|-------------|-------------|
| SLC6A4  | 0.937415762 | -0.654111524 | 0.513039957 | 0.77237948  | 1.137715764 |
| EPCAM   | 0.937242536 | -0.648815322 | 0.516457753 | 0.770586686 | 1.139941279 |
| ASS1    | 1.064871838 | 0.645377478  | 0.518682595 | 0.879827072 | 1.288835122 |
| TUFM    | 0.934390583 | -0.643686406 | 0.519778807 | 0.759959399 | 1.14885843  |
| SORD    | 0.939685195 | -0.638077515 | 0.523423222 | 0.776234904 | 1.137552899 |
| P4HB    | 0.937363033 | -0.635611906 | 0.525029407 | 0.767861998 | 1.144280427 |
| PLCB1   | 1.062477246 | 0.617402323  | 0.53696939  | 0.876530599 | 1.287870497 |
| RPL34   | 1.061696944 | 0.607194281  | 0.543721987 | 0.875131405 | 1.288035595 |
| SLC26A1 | 1.059100195 | 0.597300313  | 0.550306896 | 0.877221645 | 1.278688494 |
| PRDX6   | 1.061576681 | 0.588253001  | 0.556362487 | 0.869932581 | 1.295439526 |
| HNRNPA1 | 0.943993742 | -0.584804218 | 0.558679368 | 0.778177051 | 1.145143233 |
| PNPLA3  | 0.943117175 | -0.581367599 | 0.56099273  | 0.774138862 | 1.148979918 |
| NAV2    | 0.944432027 | -0.581182206 | 0.561117659 | 0.778819884 | 1.14526076  |
| GAPDH   | 0.942025524 | -0.575908647 | 0.564676931 | 0.768760964 | 1.154340725 |
| ATF3    | 1.05382328  | 0.5657874    | 0.571538313 | 0.878814258 | 1.263683986 |
| CHK     | 0.945936695 | -0.555632201 | 0.578462314 | 0.777529327 | 1.150819912 |
| DPYSL2  | 0.950183474 | -0.553563003 | 0.579877952 | 0.792924535 | 1.138631224 |
| EP300   | 0.947282375 | -0.5318925   | 0.594800452 | 0.775905631 | 1.156511645 |
| RPL24   | 1.059398807 | 0.53041      | 0.595827694 | 0.855972917 | 1.311169793 |
| GBE1    | 0.950225407 | -0.523971922 | 0.600298069 | 0.785028075 | 1.150186027 |
| EHHADH  | 0.953414036 | -0.514433079 | 0.606949237 | 0.794959975 | 1.143451688 |
| HSD11B1 | 1.048638781 | 0.510354712  | 0.609802979 | 0.87380443  | 1.258454701 |
| AHR     | 1.053028403 | 0.507653127  | 0.611696626 | 0.862586509 | 1.285516067 |
| TPM4    | 0.949765572 | -0.506298041 | 0.612647438 | 0.77797541  | 1.159489915 |
| FAH     | 1.049050598 | 0.495428741  | 0.620297511 | 0.868007996 | 1.267853709 |
| SPTAN1  | 0.953458291 | -0.49499188  | 0.620605852 | 0.789486947 | 1.151485424 |
| RPS15A  | 0.950836451 | -0.487297333 | 0.626047638 | 0.776327568 | 1.164572783 |
| RBKS    | 0.953434177 | -0.486626039 | 0.626523367 | 0.786829748 | 1.155315661 |
| WDR26   | 1.050724848 | 0.482537256  | 0.629424339 | 0.859419554 | 1.284614368 |
| RPS3A   | 0.951572295 | -0.476308631 | 0.633854517 | 0.775767951 | 1.167217375 |
| MGST2   | 0.953073608 | -0.474996235 | 0.634789657 | 0.78162143  | 1.162134593 |
| EDN1    | 0.955222103 | -0.472544677 | 0.63653806  | 0.78992095  | 1.155114655 |
| ABCC2   | 0.956735651 | -0.472090962 | 0.636861864 | 0.796244747 | 1.149575063 |
| KLF9    | 1.047185917 | 0.465937344  | 0.64126035  | 0.862568848 | 1.27131689  |
| KRT7    | 1.041108512 | 0.460534866  | 0.645132351 | 0.877073084 | 1.235822823 |
| CKB     | 0.957119206 | -0.458251809 | 0.646771542 | 0.793518168 | 1.154450159 |
| TPPP3   | 1.041778214 | 0.448439614  | 0.653835958 | 0.871136327 | 1.245846159 |
| OXA1L   | 1.047782691 | 0.444834926  | 0.656439053 | 0.853012224 | 1.287025598 |
| AZGP1   | 1.044833997 | 0.443966494  | 0.657066809 | 0.860914137 | 1.268045249 |
| HLCS    | 0.957595677 | -0.443415425 | 0.657465281 | 0.790686857 | 1.159737855 |
| ABAT    | 0.960064686 | -0.429414078 | 0.66762191  | 0.79710418  | 1.156340945 |
| HBB     | 0.958396185 | -0.425369437 | 0.670567382 | 0.787972012 | 1.165680042 |
| GLS2    | 1.044670325 | 0.423287709  | 0.672085361 | 0.853294469 | 1.278967727 |
| GPT     | 1.043570249 | 0.418256868  | 0.675759322 | 0.85453235  | 1.274426725 |
| TRAF6   | 0.958592229 | -0.41632064  | 0.677175391 | 0.78554229  | 1.169763962 |
| HGF     | 0.954307128 | -0.412140552 | 0.680236407 | 0.764000759 | 1.192017263 |
| DERA    | 0.958931222 | -0.407882688 | 0.683359803 | 0.783920976 | 1.17301248  |
| F2      | 1.028913284 | 0.407633621  | 0.683542677 | 0.897139045 | 1.180042885 |
| H6PD    | 1.040565096 | 0.403895765  | 0.686289371 | 0.857961188 | 1.262033451 |
| HNF1A   | 1.041875952 | 0.396665536  | 0.691614118 | 0.850717393 | 1.275988369 |
| FAM120A | 0.960581841 | -0.393356491 | 0.6940562   | 0.786156453 | 1.173707178 |
| PCK1    | 0.962645631 | -0.389613703 | 0.696822218 | 0.794865909 | 1.165840175 |
| KPNA1   | 0.960716166 | -0.387248034 | 0.698572593 | 0.784339925 | 1.17675452  |
| NEAT1   | 0.957503034 | -0.382749959 | 0.701905168 | 0.766591091 | 1.195959711 |
| AMBP    | 0.96640183  | -0.379901706 | 0.704018381 | 0.810185651 | 1.152738876 |
| GTF2I   | 0.965148178 | -0.369611208 | 0.711672199 | 0.79964912  | 1.164899682 |
| YWHAH   | 0.96583446  | -0.367860337 | 0.712977376 | 0.802535207 | 1.16236172  |
| ST6GAL1 | 0.96678566  | -0.365996003 | 0.714368058 | 0.806809868 | 1.158481756 |
| CIRBP   | 1.036066998 | 0.36214861   | 0.71724098  | 0.855279732 | 1.255068704 |
| GLS     | 1.036350469 | 0.359145082  | 0.719486558 | 0.85286865  | 1.259305632 |
| CHKA    | 0.965864052 | -0.359028182 | 0.719574007 | 0.799044995 | 1.16751043  |
| IQGAP1  | 1.036661834 | 0.357661405  | 0.720596719 | 0.85103348  | 1.262779646 |
| ITPR2   | 0.963356902 | -0.352537641 | 0.724435094 | 0.78279997  | 1.18556024  |
| MST1    | 1.031434716 | 0.351602147  | 0.725136655 | 0.867985264 | 1.225663173 |
| MTMR1   | 0.969462549 | -0.329948782 | 0.741438663 | 0.806348181 | 1.165572958 |
| EIF4G3  | 0.968266114 | -0.324941998 | 0.74522497  | 0.797110771 | 1.176171872 |
| LIN7A   | 0.971675991 | -0.323610669 | 0.74623281  | 0.816478309 | 1.156373931 |
| KYNU    | 1.030733839 | 0.317789247  | 0.750644808 | 0.855195358 | 1.24230357  |
| HNF4A   | 0.97054656  | -0.315853054 | 0.752114047 | 0.806211597 | 1.168378907 |

|          |             |              |             |             |             |
|----------|-------------|--------------|-------------|-------------|-------------|
| RPS4X    | 1.031571609 | 0.30382989   | 0.761257493 | 0.844144449 | 1.260613614 |
| MYL6     | 1.030948183 | 0.302217478  | 0.762486282 | 0.846042699 | 1.256265385 |
| CYP4F2   | 0.970513434 | -0.298422938 | 0.765380384 | 0.797317199 | 1.181332005 |
| ARG1     | 1.019965484 | 0.29724043   | 0.766282957 | 0.895311143 | 1.161975472 |
| ABCC3    | 0.970323233 | -0.29580073  | 0.767382265 | 0.794740252 | 1.184697985 |
| APOA1    | 1.022521137 | 0.288803596  | 0.77273168  | 0.879085918 | 1.189359827 |
| PC       | 0.972359815 | -0.288186404 | 0.773204056 | 0.803596608 | 1.176564957 |
| THRB     | 1.026150971 | 0.276058108  | 0.782503436 | 0.854305661 | 1.232563313 |
| KDEL2    | 1.026753929 | 0.275940698  | 0.782593614 | 0.851182136 | 1.238540597 |
| LMO7     | 0.975947249 | -0.253492068 | 0.79988799  | 0.808485745 | 1.178095023 |
| LGALS3   | 0.97639061  | -0.249830061 | 0.802718772 | 0.809503501 | 1.177683137 |
| RNF31    | 1.02508412  | 0.242058616  | 0.808734744 | 0.838762688 | 1.252794704 |
| RANBP10  | 0.976413276 | -0.238145172 | 0.811768501 | 0.802264461 | 1.188364849 |
| RPL22    | 1.022390098 | 0.22737741   | 0.820130285 | 0.844738876 | 1.237401927 |
| HKDC1    | 0.980402489 | -0.220611751 | 0.825394751 | 0.822316917 | 1.168879079 |
| KLN1     | 0.976815555 | -0.208496791 | 0.834841088 | 0.783512797 | 1.217808608 |
| AKR1B1   | 1.019123842 | 0.202095329  | 0.8398422   | 0.848086436 | 1.22465513  |
| MYH9     | 0.979485458 | -0.197724333 | 0.84326075  | 0.797562298 | 1.20290511  |
| LDHA     | 0.981493466 | -0.191956448 | 0.84777632  | 0.811062177 | 1.187738068 |
| DOLPP1   | 1.018133171 | 0.189664108  | 0.849572348 | 0.845576706 | 1.225903157 |
| RPS3     | 0.980879013 | -0.183279342 | 0.854578843 | 0.797906752 | 1.20580962  |
| MYH14    | 0.982559666 | -0.182897585 | 0.854878378 | 0.813724533 | 1.186426178 |
| RPS9     | 1.020612581 | 0.180548516  | 0.85672197  | 0.817843615 | 1.273654303 |
| ACSL1    | 0.982810982 | -0.178889671 | 0.858024333 | 0.812773013 | 1.188422119 |
| RPL3     | 1.01905793  | 0.175883593  | 0.860385396 | 0.825723207 | 1.257660021 |
| ERN1     | 1.017174332 | 0.166687356  | 0.867616055 | 0.832602994 | 1.242661424 |
| RPS16    | 0.9837574   | -0.156608406 | 0.875553478 | 0.8014585   | 1.207521814 |
| GID4     | 1.014944818 | 0.152203888  | 0.879026127 | 0.838458924 | 1.228578949 |
| PGAM1    | 0.98671665  | -0.143307512 | 0.886047323 | 0.821797519 | 1.184731913 |
| ALDH18A1 | 0.986138053 | -0.142018302 | 0.88706555  | 0.813342502 | 1.195644218 |
| PHKA2    | 0.986252161 | -0.136692508 | 0.891273852 | 0.808694541 | 1.202794474 |
| IKBKB    | 1.013239284 | 0.136313873  | 0.891573157 | 0.83865395  | 1.224168618 |
| PROS1    | 0.988467872 | -0.123041819 | 0.902073983 | 0.821712481 | 1.189064005 |
| PDE5A    | 0.987143105 | -0.12210769  | 0.902813731 | 0.802000703 | 1.215025756 |
| ANPEP    | 0.989016979 | -0.114569277 | 0.908786533 | 0.818753392 | 1.194687674 |
| PIK3CG   | 0.988026418 | -0.113518347 | 0.909619619 | 0.802498959 | 1.216445443 |
| MDH2     | 0.988741588 | -0.101815503 | 0.91890312  | 0.795107742 | 1.229531391 |
| DCN      | 0.99047546  | -0.100802309 | 0.919707394 | 0.822300399 | 1.193045314 |
| NLRP3    | 0.989433576 | -0.100443347 | 0.919992358 | 0.804202898 | 1.21732812  |
| STUB1    | 0.989583982 | -0.098924919 | 0.921197883 | 0.804188353 | 1.217720269 |
| MYO1E    | 1.009047677 | 0.091403032  | 0.927172352 | 0.831826985 | 1.224025229 |
| KLKB1    | 0.9924894   | -0.091206761 | 0.927328303 | 0.844048621 | 1.167036098 |
| VCL      | 1.008914423 | 0.087255119  | 0.930468728 | 0.826564247 | 1.231493276 |
| ME1      | 0.99200969  | -0.084583246 | 0.932592719 | 0.823725755 | 1.194673373 |
| PRKAA1   | 0.991556881 | -0.083547379 | 0.933416306 | 0.812702947 | 1.209771728 |
| ABCA1    | 1.008548612 | 0.081232919  | 0.935256721 | 0.821297807 | 1.238491438 |
| PLA2G1B  | 1.008271005 | 0.073891489  | 0.941096728 | 0.810383039 | 1.254481364 |
| LDLR     | 0.995178005 | -0.050154279 | 0.959999446 | 0.823883013 | 1.202087246 |
| MACF1    | 0.995190125 | -0.04522618  | 0.963927027 | 0.807534402 | 1.22645349  |
| DLGAP4   | 1.004393334 | 0.044962716  | 0.964137027 | 0.829687548 | 1.215886597 |
| LPIN1    | 0.995819564 | -0.042940765 | 0.965748753 | 0.822506743 | 1.205651641 |
| RPS26    | 1.00379618  | 0.037169422  | 0.970349919 | 0.822006762 | 1.225788908 |
| NCOA2    | 1.003059368 | 0.030859721  | 0.975381412 | 0.826169442 | 1.217822936 |
| HMGB2    | 0.997291027 | -0.028074333 | 0.977602865 | 0.825231075 | 1.205225327 |
| BBS4     | 0.998017321 | -0.020186576 | 0.983894537 | 0.823098901 | 1.21010801  |
| MTTP     | 0.998373397 | -0.017082855 | 0.986370517 | 0.828279525 | 1.203397417 |
| RPS10    | 0.998570729 | -0.014227952 | 0.98864812  | 0.819992949 | 1.216039117 |
| APOB     | 0.999813653 | -0.002503615 | 0.998002406 | 0.864086821 | 1.15685984  |
| RPS12    | 1.000146495 | 0.001437094  | 0.998853365 | 0.819030371 | 1.221313697 |
