# Supplementary material for: Effect of aberrant fructose metabolism following SARS-CoV-2 infection on colorectal cancer patients’ poor prognosis
Source: PubMed Central journal article supplement (PMC11463760; doi:10.1371/journal.pcbi.1012412), 2024-09-27
Supplement: pcbi.1012412.s002.pdf [file pcbi.1012412.s002.pdf]

Supplementary Table S2

|    | logo                                                                                | geneSet     | motif        | NES  | AUC   | TF_highConf                     | TF_lowConf                                                                                                                               | nEnrGenes | rankAtMax | enrichedGenes                     |
|----|-------------------------------------------------------------------------------------|-------------|--------------|------|-------|---------------------------------|------------------------------------------------------------------------------------------------------------------------------------------|-----------|-----------|-----------------------------------|
| 1  | 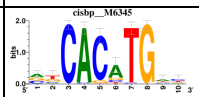   | Module_Gene | cisbp__M6345 | 5.22 | 0.209 | MITF<br>(directAnnotation).     | ARNTL; TFEC (inferredBy_MotifSimilarity).                                                                                                | 4         | 429       | ALDH3B1;FTCD;PFKF<br>B1;PTPRD     |
| 2  |    | Module_Gene | cisbp__M6454 | 4.54 | 0.186 | RORA<br>(directAnnotation).     | NR1D1; RORB; RORC (inferredBy_MotifSimilarity).                                                                                          | 4         | 654       | AOC3;GATM;IL7;PTPR<br>D           |
| 3  |    | Module_Gene | cisbp__M0465 | 4.25 | 0.176 |                                 |                                                                                                                                          | 4         | 855       | ALDH3B1;FTCD;PFKF<br>B1;TIMP1     |
| 4  |    | Module_Gene | cisbp__M4773 | 4.14 | 0.172 |                                 |                                                                                                                                          | 5         | 1185      | AOC3;GATM;IL7;PFKF<br>B1;SERPINE1 |
| 5  |    | Module_Gene | cisbp__M2558 | 4.06 | 0.169 |                                 |                                                                                                                                          | 3         | 429       | GPI;IL7;SERPINE1                  |
| 6  |    | Module_Gene | cisbp__M6226 | 3.95 | 0.166 | FEV<br>(directAnnotation).      | ELK3 (inferredBy_MotifSimilarity).                                                                                                       | 4         | 654       | IL7;PFKFB1;PTPRD;SE<br>RPINE1     |
| 7  |   | Module_Gene | cisbp__M5411 | 3.94 | 0.165 | ESRRG<br>(directAnnotation).    | ESRRA; RARA; RARB; RARG; RXRA (inferredBy_MotifSimilarity).<br>NR5A2 (inferredBy_MotifSimilarity_n_Orthology).                           | 3         | 429       | FTCD;GPI;PFKFB1                   |
| 8  |  | Module_Gene | cisbp__M0241 | 3.89 | 0.163 |                                 | BHLHE40 (inferredBy_MotifSimilarity).                                                                                                    | 4         | 855       | ALDH3B1;IL7;PFKFB1;<br>PTPRD      |
| 9  |  | Module_Gene | cisbp__M0179 | 3.87 | 0.163 | ARNT<br>(inferredBy_Orthology). | TFE3 (inferredBy_MotifSimilarity).                                                                                                       | 5         | 1221      | ALDH3B1;FTCD;GPI;P<br>FKFB1;PTPRD |
| 10 |  | Module_Gene | cisbp__M6066 | 3.87 | 0.163 | RARA<br>(inferredBy_Orthology). | ESRRA; NR1H3; NR1I2; NR2C1; NR2F2; PPARA; RARG<br>(inferredBy_MotifSimilarity). NR2F6; RARB<br>(inferredBy_MotifSimilarity_n_Orthology). | 3         | 321       | FTCD;PFKFB1;SERPIN<br>E1          |
| 11 |  | Module_Gene | cisbp__M6288 | 3.7  | 0.157 | TCF12<br>(directAnnotation).    | ASCL2; MYF6 (inferredBy_MotifSimilarity). ASCL1<br>(inferredBy_MotifSimilarity_n_Orthology).                                             | 3         | 290       | IL7;PFKFB1;PTPRD                  |

|    |                                                                                     |             |             |      |       |                                              |                                                                                                                                                                                                                            |   |      |                                                     |
|----|-------------------------------------------------------------------------------------|-------------|-------------|------|-------|----------------------------------------------|----------------------------------------------------------------------------------------------------------------------------------------------------------------------------------------------------------------------------|---|------|-----------------------------------------------------|
| 12 | 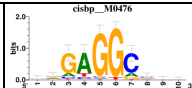   | Module_Gene | cisbp_M0476 | 3.67 | 0.156 |                                              |                                                                                                                                                                                                                            | 3 | 429  | ALDH3B1;FTCD;PFKFB1                                 |
| 13 |    | Module_Gene | cisbp_M6455 | 3.67 | 0.156 | RORC<br>(directAnnotation).                  | NR1D1; RORA; RORB (inferredBy_MotifSimilarity).                                                                                                                                                                            | 2 | 69   | IL7;PTPRD                                           |
| 14 |    | Module_Gene | cisbp_M4777 | 3.51 | 0.151 |                                              |                                                                                                                                                                                                                            | 8 | 3325 | AASS;ALDH3B1;CLEC4A;CTNNB1;IL7;PTPRD;SERPINE1;TIMP1 |
| 15 |    | Module_Gene | cisbp_M1889 | 3.49 | 0.15  | MAX<br>(directAnnotation).                   | MYC (inferredBy_MotifSimilarity).                                                                                                                                                                                          | 4 | 687  | ALDH3B1;FTCD;GATM;PFKFB1                            |
| 16 |    | Module_Gene | cisbp_M6138 | 3.47 | 0.149 | RELA<br>(inferredBy_Orthology).              | CUX1; KLF15; MAZ; PATZ1; REST; VEZF1; WT1; ZNF263; ZNF341; ZNF467 (inferredBy_MotifSimilarity). BCL6; ELF5; SP5 (inferredBy_MotifSimilarity_n_Orthology).                                                                  | 4 | 855  | AOC3;IL7;PFKFB1;PTPRD                               |
| 17 |    | Module_Gene | cisbp_M6522 | 3.41 | 0.147 | THRA<br>(directAnnotation).                  | NR1H3; RARA; THRB (inferredBy_MotifSimilarity). RXRA (inferredBy_MotifSimilarity_n_Orthology).                                                                                                                             | 3 | 429  | AOC3;FTCD;PTPRD                                     |
| 18 |    | Module_Gene | cisbp_M5063 | 3.41 | 0.147 | TCF12; TCF3; TCF4<br>(inferredBy_Orthology). | SNAI1 (inferredBy_MotifSimilarity). ASCL1; ASCL2 (inferredBy_MotifSimilarity_n_Orthology).                                                                                                                                 | 3 | 496  | IL7;PFKFB1;PTPRD                                    |
| 19 |    | Module_Gene | cisbp_M0180 | 3.37 | 0.146 | ARNT2<br>(inferredBy_Orthology).             |                                                                                                                                                                                                                            | 3 | 463  | ALDH3B1;FTCD;PFKFB1                                 |
| 20 |    | Module_Gene | cisbp_M4576 | 3.31 | 0.144 | RXRA<br>(directAnnotation).                  | ESRRA; HNF4A; HNF4G; NR1H2; NR1H3; NR1H2; NR1H3; NR2C2; NR2F1; NR2F2; NR2F6; NR4A3; PPARA; PPARC; PPARG; RARA; RARB; RARG; RXRB; RXRG; ZNF71 (inferredBy_MotifSimilarity). NR2C1 (inferredBy_MotifSimilarity_n_Orthology). | 3 | 654  | AOC3;PFKFB1;SERPINE1                                |
| 21 |  | Module_Gene | cisbp_M6257 | 3.31 | 0.144 | GATA5<br>(directAnnotation).                 |                                                                                                                                                                                                                            | 4 | 855  | AOC3;IL7;PFKFB1;SERPINE1                            |
| 22 |  | Module_Gene | cisbp_M2127 | 3.27 | 0.142 |                                              |                                                                                                                                                                                                                            | 3 | 654  | ALDH3B1;AOC3;GATM                                   |
| 23 |  | Module_Gene | cisbp_M0237 | 3.25 | 0.142 |                                              | TFE3 (inferredBy_MotifSimilarity).                                                                                                                                                                                         | 4 | 855  | ALDH3B1;FTCD;PFKFB1;PTPRD                           |
| 24 |  | Module_Gene | cisbp_M4489 | 3.24 | 0.141 | SPI1<br>(directAnnotation).                  | BCL11A; EP300; IKZF1; IRF1; IRF2; IRF3; IRF4; IRF5; IRF6; IRF7; IRF8; MTA3; PAX5; PRDM1; SPIB; STAT1; STAT2; STAT3; TBL1XR1 (inferredBy_MotifSimilarity).                                                                  | 3 | 697  | IL7;PTPRD;TIMP1                                     |

|    |                                                                                     |             |             |      |       |                                                |                                                                                                                                                                                                      |   |      |                                                     |
|----|-------------------------------------------------------------------------------------|-------------|-------------|------|-------|------------------------------------------------|------------------------------------------------------------------------------------------------------------------------------------------------------------------------------------------------------|---|------|-----------------------------------------------------|
| 25 | 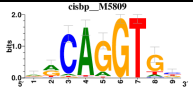   | Module_Gene | cisbp_M5809 | 3.22 | 0.141 | SNAI2<br>(directAnnotation).                   | ASCL1; ID4; MYF5; MYF6; MYOD1; MYOG; SNAI1; SNAI3; TCF12; TCF3; TCF4; TFF3 (inferredBy_MotifSimilarity). ASCL2; MSC; TCF21; TCF23; TCF24 (inferredBy_MotifSimilarity_n_Orthology).                   | 3 | 654  | IL7;PFKFB1;PTPRD                                    |
| 26 |    | Module_Gene | cisbp_M2303 | 3.22 | 0.141 | NR2C2<br>(directAnnotation).                   | HDAC2; HNF4A; HNF4G; NR1H2; NR1H4; NR2E3; NR2F1; NR2F2; NR2F6; PPARA; PPARG; PPARG; RXRA; RXRB; RXRG; SP1; TCF12; THRB (inferredBy_MotifSimilarity). NR1H3 (inferredBy_MotifSimilarity_n_Orthology). | 9 | 4340 | AASS;AOC3;CLEC4A;FTCD;GPI;IL7;PFKFB1;SERPINE1;TIMP1 |
| 27 |    | Module_Gene | cisbp_M2266 | 3.2  | 0.14  | BHLHE40<br>(inferredBy_Orthology).             |                                                                                                                                                                                                      | 7 | 2213 | ALDH3B1;FTCD;GPI;IL7;PFKFB1;PTPRD;SERPINE1          |
| 28 |    | Module_Gene | cisbp_M5131 | 3.16 | 0.139 | TCF12; TCF3; TCF4<br>(inferredBy_Orthology).   | ATOH7; BHLHE22; BHLHE23 (inferredBy_MotifSimilarity_n_Orthology).                                                                                                                                    | 8 | 4998 | AASS;ALDH3B1;AOC3;FTCD;GATM;PFKFB1;PTPRD;SERPINE1   |
| 29 |    | Module_Gene | cisbp_M6387 | 3.15 | 0.138 | NR1I3<br>(directAnnotation).                   | NR1H2; NR1H3; NR1I2; NR2F1; NR2F2; RARA; RARB; RARG; RXRA; RXRB (inferredBy_MotifSimilarity).                                                                                                        | 4 | 1054 | AOC3;FTCD;PFKFB1;SERPINE1                           |
| 30 |    | Module_Gene | cisbp_M0397 | 3.13 | 0.138 | ZNF263<br>(inferredBy_Orthology).              |                                                                                                                                                                                                      | 2 | 168  | FTCD;GATM                                           |
| 31 |    | Module_Gene | cisbp_M6074 | 3.13 | 0.138 | RARG<br>(inferredBy_Orthology).                | NR1I2; NR1I3; RARA; RXRA; RXRB; THRB (inferredBy_MotifSimilarity). RARB (inferredBy_MotifSimilarity_n_Orthology).                                                                                    | 3 | 687  | FTCD;PFKFB1;SERPINE1                                |
| 32 |    | Module_Gene | cisbp_M0524 | 3.09 | 0.137 |                                                |                                                                                                                                                                                                      | 4 | 923  | ALDH3B1;AOC3;IL7;PTPRD                              |
| 33 |   | Module_Gene | cisbp_M5274 | 3.06 | 0.136 | SNAI1; SNAI2; SNAI3<br>(inferredBy_Orthology). | MYOD1 (inferredBy_MotifSimilarity).                                                                                                                                                                  | 3 | 600  | IL7;PFKFB1;PTPRD                                    |
| 34 |  | Module_Gene | cisbp_M0068 | 3.06 | 0.136 |                                                |                                                                                                                                                                                                      | 2 | 168  | PFKFB1;SERPINE1                                     |
| 35 |  | Module_Gene | cisbp_M4745 | 3.05 | 0.135 | ASCL1; ASCL2<br>(inferredBy_Orthology).        | SNAI1; TCF12; TCF4 (inferredBy_MotifSimilarity). SNAI2; SNAI3; TCF3 (inferredBy_MotifSimilarity_n_Orthology).                                                                                        | 2 | 191  | IL7;PTPRD                                           |
| 36 |  | Module_Gene | cisbp_M5762 | 3.04 | 0.135 | RARA<br>(directAnnotation).                    | ESRRA; NR1I2; NR2C1; NR2C2; RARG; RXRA; RXRB; THRB (inferredBy_MotifSimilarity). NR2F6; NR5A1; RARB; THRA (inferredBy_MotifSimilarity_n_Orthology).                                                  | 5 | 1588 | AOC3;FTCD;GPI;PFKFB1;SERPINE1                       |
| 37 |  | Module_Gene | cisbp_M4937 | 3.01 | 0.134 | NR1D1; NR1D2<br>(inferredBy_Orthology).        | RORA; RORC (inferredBy_MotifSimilarity).                                                                                                                                                             | 6 | 2002 | ALDH3B1;AOC3;GATM;IL7;PTPRD;SERPINE1                |
