# Supplementary material for: Effect of aberrant fructose metabolism following SARS-CoV-2 infection on colorectal cancer patients’ poor prognosis
Source: PubMed Central journal article supplement (PMC11463760; doi:10.1371/journal.pcbi.1012412), 2024-09-27
Supplement: pcbi.1012412.s003.pdf [file pcbi.1012412.s003.pdf]

**Table S2**

| mRNA     | miRNA         |
|----------|---------------|
| GPI      | hsa-miR-551a  |
| GPI      | hsa-miR-600   |
| GPI      | hsa-miR-612   |
| GPI      | hsa-miR-320b  |
| GPI      | hsa-miR-297   |
| GPI      | hsa-miR-646   |
| GPI      | hsa-miR-760   |
| GPI      | hsa-miR-1303  |
| GPI      | hsa-miR-1269a |
| GPI      | hsa-miR-1273c |
| GPI      | hsa-miR-1260b |
| GPI      | hsa-miR-4478  |
| PMM2     | hsa-miR-198   |
| PMM2     | hsa-miR-326   |
| PMM2     | hsa-miR-422a  |
| PMM2     | hsa-miR-492   |
| PMM2     | hsa-miR-551a  |
| PMM2     | hsa-miR-646   |
| PMM2     | hsa-miR-320b  |
| PMM2     | hsa-miR-1303  |
| PMM2     | hsa-miR-2110  |
| PMM2     | hsa-miR-1260b |
| PMM2     | hsa-miR-4286  |
| SERPINE1 | hsa-miR-107   |
| SERPINE1 | hsa-miR-326   |
| SERPINE1 | hsa-miR-484   |
| SERPINE1 | hsa-miR-551a  |
| SERPINE1 | hsa-miR-612   |
| SERPINE1 | hsa-miR-1275  |
| SERPINE1 | hsa-miR-4286  |
| ALDH3B1  | hsa-miR-1273c |
| ALDH3B1  | hsa-miR-4301  |
| ALDH3B1  | hsa-miR-4286  |
| ALDH3B1  | hsa-miR-198   |
| ALDH3B1  | hsa-miR-622   |
| ALDH3B1  | hsa-miR-320b  |
| ALDH3B1  | hsa-miR-7702  |
| ALDH3B1  | hsa-miR-551a  |
| ALDH3B1  | hsa-miR-1303  |
| PTPRD    | hsa-miR-320b  |
| PTPRD    | hsa-miR-1260b |
| PTPRD    | hsa-miR-567   |
| PTPRD    | hsa-miR-650   |
| PTPRD    | hsa-miR-1246  |
| PTPRD    | hsa-miR-1275  |
| CTNNB1   | hsa-miR-484   |
| CTNNB1   | hsa-miR-1275  |
| CTNNB1   | hsa-miR-1260b |
| CTNNB1   | hsa-miR-3666  |
| CTNNB1   | hsa-miR-4286  |
| PFKFB1   | hsa-miR-612   |
| PFKFB1   | hsa-miR-198   |
| PFKFB1   | hsa-miR-422a  |
| PFKFB1   | hsa-miR-1258  |
| AOC3     | hsa-miR-198   |
| AOC3     | hsa-miR-422a  |
| AOC3     | hsa-miR-492   |
| AOC3     | hsa-miR-650   |
| AOC3     | hsa-miR-320b  |
| AOC3     | hsa-miR-760   |
| AOC3     | hsa-miR-551a  |
| AOC3     | hsa-miR-646   |
| FDFT1    | hsa-miR-1269a |
| FDFT1    | hsa-miR-320e  |
| FDFT1    | hsa-miR-320b  |
| FTCD     | hsa-miR-622   |
| FTCD     | hsa-miR-760   |

|        |               |
|--------|---------------|
| FTCD   | hsa-miR-492   |
| FTCD   | hsa-miR-1246  |
| GATM   | hsa-miR-2110  |
| TIMP1  | hsa-miR-198   |
| TIMP1  | hsa-miR-612   |
| AASS   | hsa-miR-198   |
| AASS   | hsa-miR-326   |
| AASS   | hsa-miR-1303  |
| AASS   | hsa-miR-3666  |
| AASS   | hsa-miR-451a  |
| AASS   | hsa-miR-544a  |
| AASS   | hsa-miR-608   |
| AASS   | hsa-miR-650   |
| AASS   | hsa-miR-1273c |
| CLEC4A | hsa-miR-297   |
