# Supplementary material for: Effect of aberrant fructose metabolism following SARS-CoV-2 infection on colorectal cancer patients’ poor prognosis
Source: PubMed Central journal article supplement (PMC11463760; doi:10.1371/journal.pcbi.1012412), 2024-09-27
Supplement: pcbi.1012412.s004.pdf [file pcbi.1012412.s004.pdf]

| Table S3    |                 |  |
|-------------|-----------------|--|
| miRNA       | lncRNA          |  |
| hsa-miR-107 | AL645608.1      |  |
| hsa-miR-107 | AL390719.2      |  |
| hsa-miR-107 | LINC01134       |  |
| hsa-miR-107 | AL603962.1      |  |
| hsa-miR-107 | LINC01772       |  |
| hsa-miR-107 | AL137127.1      |  |
| hsa-miR-107 | LINC01355       |  |
| hsa-miR-107 | ELOA-AS1        |  |
| hsa-miR-107 | AL354919.1      |  |
| hsa-miR-107 | AL031985.3      |  |
| hsa-miR-107 | AL139220.2      |  |
| hsa-miR-107 | AL691459.1      |  |
| hsa-miR-107 | AL139147.1      |  |
| hsa-miR-107 | LAMTOR5-AS1     |  |
| hsa-miR-107 | SLC16A1-AS1     |  |
| hsa-miR-107 | RP6-42F4.1      |  |
| hsa-miR-107 | LIX1L-AS1       |  |
| hsa-miR-107 | RP4-565E6.1     |  |
| hsa-miR-107 | XXYac-YX155B6.6 |  |
| hsa-miR-107 | AL645568.1      |  |
| hsa-miR-107 | LINC01351       |  |
| hsa-miR-107 | MIR181A1HG      |  |
| hsa-miR-107 | AC119427.1      |  |
| hsa-miR-107 | MIR29B2CHG      |  |
| hsa-miR-107 | ACBD3-AS1       |  |
| hsa-miR-107 | AL162595.1      |  |
| hsa-miR-107 | AL591848.4      |  |
| hsa-miR-107 | AC010969.2      |  |
| hsa-miR-107 | AC013400.1      |  |
| hsa-miR-107 | AL133243.3      |  |
| hsa-miR-107 | AC016722.3      |  |
| hsa-miR-107 | AC007744.1      |  |
| hsa-miR-107 | AC016747.1      |  |
| hsa-miR-107 | LINC01798       |  |
| hsa-miR-107 | PCBP1-AS1       |  |
| hsa-miR-107 | ALMS1-IT1       |  |
| hsa-miR-107 | DGUOK-AS1       |  |
| hsa-miR-107 | TCF7L1-IT1      |  |
| hsa-miR-107 | CYTOR           |  |
| hsa-miR-107 | AC062029.1      |  |
| hsa-miR-107 | AC092168.2      |  |
| hsa-miR-107 | LINC01885       |  |
| hsa-miR-107 | LINC01106       |  |
| hsa-miR-107 | PAX8-AS1        |  |
| hsa-miR-107 | LINC01101       |  |
| hsa-miR-107 | AC019080.1      |  |
| hsa-miR-107 | TTN-AS1         |  |
| hsa-miR-107 | AC069277.1      |  |
| hsa-miR-107 | AC018809.2      |  |
| hsa-miR-107 | AC093495.1      |  |
| hsa-miR-107 | FGD5-AS1        |  |
| hsa-miR-107 | LINC00691       |  |
| hsa-miR-107 | ACVR2B-AS1      |  |
| hsa-miR-107 | AC012467.2      |  |
| hsa-miR-107 | AC097634.1      |  |
| hsa-miR-107 | LINC00960       |  |
| hsa-miR-107 | DUBR            |  |
| hsa-miR-107 | AC128688.2      |  |
| hsa-miR-107 | AC092468.1      |  |
| hsa-miR-107 | AC083798.2      |  |
| hsa-miR-107 | LINC02035       |  |
| hsa-miR-107 | AC097103.2      |  |
| hsa-miR-107 | AC022498.2      |  |
| hsa-miR-107 | DLG1-AS1        |  |
| hsa-miR-107 | CTBP1-AS2       |  |
| hsa-miR-107 | AFAP1-AS1       |  |
| hsa-miR-107 | AC107398.3      |  |
| hsa-miR-107 | AC107068.1      |  |
| hsa-miR-107 | AC097460.1      |  |
| hsa-miR-107 | AC108062.1      |  |
| hsa-miR-107 | LINC02432       |  |

|             |                         |  |
|-------------|-------------------------|--|
| hsa-miR-107 | AC093908.1              |  |
| hsa-miR-107 | MIR4453HG               |  |
| hsa-miR-107 | AC104083.1              |  |
| hsa-miR-107 | AC097534.2              |  |
| hsa-miR-107 | LINC02362               |  |
| hsa-miR-107 | LINC02434               |  |
| hsa-miR-107 | SLC9A3-AS1              |  |
| hsa-miR-107 | AC106744.1              |  |
| hsa-miR-107 | AC008875.1              |  |
| hsa-miR-107 | MRPS30-DT               |  |
| hsa-miR-107 | AC093297.2              |  |
| hsa-miR-107 | PART1                   |  |
| hsa-miR-107 | CKMT2-AS1               |  |
| hsa-miR-107 | RGMB-AS1                |  |
| hsa-miR-107 | LINC01023               |  |
| hsa-miR-107 | STARD4-AS1              |  |
| hsa-miR-107 | AC116353.4              |  |
| hsa-miR-107 | AC005609.1              |  |
| hsa-miR-107 | AC021078.1              |  |
| hsa-miR-107 | SAP30L-AS1              |  |
| hsa-miR-107 | AL008729.1              |  |
| hsa-miR-107 | CASC15                  |  |
| hsa-miR-107 | AL451165.2              |  |
| hsa-miR-107 | AL021368.2              |  |
| hsa-miR-107 | AL135905.1              |  |
| hsa-miR-107 | AL589935.1              |  |
| hsa-miR-107 | Z94721.2                |  |
| hsa-miR-107 | HOXA-AS2                |  |
| hsa-miR-107 | AC005154.1              |  |
| hsa-miR-107 | TRG-AS1                 |  |
| hsa-miR-107 | AC004837.2              |  |
| hsa-miR-107 | LINC01446               |  |
| hsa-miR-107 | EGFR-AS1                |  |
| hsa-miR-107 | AC006480.2              |  |
| hsa-miR-107 | AC114737.1              |  |
| hsa-miR-107 | AC003092.1              |  |
| hsa-miR-107 | DLX6-AS1                |  |
| hsa-miR-107 | STAG3L5P-PV/RIG2P-PILRB |  |
| hsa-miR-107 | AC069281.2              |  |
| hsa-miR-107 | SLC26A4-AS1             |  |
| hsa-miR-107 | AC090114.2              |  |
| hsa-miR-107 | EPHA1-AS1               |  |
| hsa-miR-107 | LINC00689               |  |
| hsa-miR-107 | LINC00599               |  |
| hsa-miR-107 | AF106564.1              |  |
| hsa-miR-107 | AC105150.1              |  |
| hsa-miR-107 | LINC01419               |  |
| hsa-miR-107 | AF117829.1              |  |
| hsa-miR-107 | AC018781.1              |  |
| hsa-miR-107 | AZIN1-AS1               |  |
| hsa-miR-107 | AC090198.1              |  |
| hsa-miR-107 | AC108002.1              |  |
| hsa-miR-107 | AL162231.4              |  |
| hsa-miR-107 | SMC5-AS1                |  |
| hsa-miR-107 | AL590705.1              |  |
| hsa-miR-107 | AL590705.5              |  |
| hsa-miR-107 | AL512590.3              |  |
| hsa-miR-107 | AL441992.1              |  |
| hsa-miR-107 | AL358781.1              |  |
| hsa-miR-107 | AL359878.1              |  |
| hsa-miR-107 | LINC00702               |  |
| hsa-miR-107 | AL137145.1              |  |
| hsa-miR-107 | AC010997.6              |  |
| hsa-miR-107 | NUTM2B-AS1              |  |
| hsa-miR-107 | TMEM254-AS1             |  |
| hsa-miR-107 | LINC00858               |  |
| hsa-miR-107 | AC067750.1              |  |
| hsa-miR-107 | NUTM2A-AS1              |  |
| hsa-miR-107 | AL391684.1              |  |
| hsa-miR-107 | RPARP-AS1               |  |
| hsa-miR-107 | CASC2                   |  |
| hsa-miR-107 | AL391005.1              |  |
| hsa-miR-107 | AP006621.3              |  |

|             |               |  |
|-------------|---------------|--|
| hsa-miR-107 | H19           |  |
| hsa-miR-107 | KCNQ1OT1      |  |
| hsa-miR-107 | LINC00294     |  |
| hsa-miR-107 | AC080100.1    |  |
| hsa-miR-107 | AP003559.1    |  |
| hsa-miR-107 | NEAT1         |  |
| hsa-miR-107 | AP002748.3    |  |
| hsa-miR-107 | AP000560.1    |  |
| hsa-miR-107 | AP003119.3    |  |
| hsa-miR-107 | AP000974.1    |  |
| hsa-miR-107 | AP000766.1    |  |
| hsa-miR-107 | COLCA1        |  |
| hsa-miR-107 | AP001781.1    |  |
| hsa-miR-107 | AP003393.1    |  |
| hsa-miR-107 | AP000866.2    |  |
| hsa-miR-107 | AC092471.2    |  |
| hsa-miR-107 | AC005831.1    |  |
| hsa-miR-107 | AC010168.2    |  |
| hsa-miR-107 | AC084816.1    |  |
| hsa-miR-107 | DDX11-AS1     |  |
| hsa-miR-107 | AC015540.1    |  |
| hsa-miR-107 | AC008124.1    |  |
| hsa-miR-107 | AC004466.1    |  |
| hsa-miR-107 | AC117498.1    |  |
| hsa-miR-107 | AC011603.2    |  |
| hsa-miR-107 | AC008147.2    |  |
| hsa-miR-107 | AC090502.1    |  |
| hsa-miR-107 | AC078923.1    |  |
| hsa-miR-107 | POC1B-AS1     |  |
| hsa-miR-107 | RMST          |  |
| hsa-miR-107 | HELLPAR       |  |
| hsa-miR-107 | AC079316.2    |  |
| hsa-miR-107 | AC027290.2    |  |
| hsa-miR-107 | AC026362.1    |  |
| hsa-miR-107 | AC055713.1    |  |
| hsa-miR-107 | AC068790.9    |  |
| hsa-miR-107 | AC131212.3    |  |
| hsa-miR-107 | N4BP2L2-IT2   |  |
| hsa-miR-107 | DLEU2         |  |
| hsa-miR-107 | AL162377.1    |  |
| hsa-miR-107 | LINC00355     |  |
| hsa-miR-107 | AL137782.1    |  |
| hsa-miR-107 | MIR4500HG     |  |
| hsa-miR-107 | AL161431.1    |  |
| hsa-miR-107 | LINC00641     |  |
| hsa-miR-107 | AL132780.2    |  |
| hsa-miR-107 | AL135999.2    |  |
| hsa-miR-107 | LINC02313     |  |
| hsa-miR-107 | PSMA3-AS1     |  |
| hsa-miR-107 | AL049775.1    |  |
| hsa-miR-107 | AL928654.4    |  |
| hsa-miR-107 | SNHG14        |  |
| hsa-miR-107 | AC020658.2    |  |
| hsa-miR-107 | AC090984.1    |  |
| hsa-miR-107 | MIR9-3HG      |  |
| hsa-miR-107 | AC091167.5    |  |
| hsa-miR-107 | AC016251.1    |  |
| hsa-miR-107 | AC118658.1    |  |
| hsa-miR-107 | AC023024.2    |  |
| hsa-miR-107 | Z98883.1      |  |
| hsa-miR-107 | AC093525.10   |  |
| hsa-miR-107 | AC141586.4    |  |
| hsa-miR-107 | ERVK13-1      |  |
| hsa-miR-107 | MMP25-AS1     |  |
| hsa-miR-107 | AC012676.5    |  |
| hsa-miR-107 | AC007221.1    |  |
| hsa-miR-107 | AC007014.1    |  |
| hsa-miR-107 | RRN3P2        |  |
| hsa-miR-107 | AC025279.1    |  |
| hsa-miR-107 | AC009093.10   |  |
| hsa-miR-107 | SLX1B-SULT1A4 |  |
| hsa-miR-107 | AC120114.4    |  |
| hsa-miR-107 | AC120114.2    |  |

|             |               |  |
|-------------|---------------|--|
| hsa-miR-107 | SLX1A-SULT1A3 |  |
| hsa-miR-107 | AC079416.3    |  |
| hsa-miR-107 | AC010533.1    |  |
| hsa-miR-107 | AC040162.3    |  |
| hsa-miR-107 | AC020978.7    |  |
| hsa-miR-107 | AC020978.5    |  |
| hsa-miR-107 | AC009060.1    |  |
| hsa-miR-107 | AC079414.3    |  |
| hsa-miR-107 | AC136603.1    |  |
| hsa-miR-107 | AC027279.1    |  |
| hsa-miR-107 | AC092718.7    |  |
| hsa-miR-107 | AC092135.3    |  |
| hsa-miR-107 | AC092127.1    |  |
| hsa-miR-107 | AC010536.1    |  |
| hsa-miR-107 | AC005696.1    |  |
| hsa-miR-107 | AC104581.4    |  |
| hsa-miR-107 | AC093484.1    |  |
| hsa-miR-107 | SMCR5         |  |
| hsa-miR-107 | AC026271.3    |  |
| hsa-miR-107 | CCDC144NL-AS1 |  |
| hsa-miR-107 | AC003102.1    |  |
| hsa-miR-107 | AC008105.1    |  |
| hsa-miR-107 | SP2-AS1       |  |
| hsa-miR-107 | AC018521.1    |  |
| hsa-miR-107 | AC018628.1    |  |
| hsa-miR-107 | AC005332.6    |  |
| hsa-miR-107 | LINC01482     |  |
| hsa-miR-107 | KCNJ2-AS1     |  |
| hsa-miR-107 | SOX9-AS1      |  |
| hsa-miR-107 | AC097641.2    |  |
| hsa-miR-107 | LINC01979     |  |
| hsa-miR-107 | AC087741.1    |  |
| hsa-miR-107 | LINC01970     |  |
| hsa-miR-107 | AP005328.1    |  |
| hsa-miR-107 | AP001094.2    |  |
| hsa-miR-107 | AP000864.1    |  |
| hsa-miR-107 | AC090772.3    |  |
| hsa-miR-107 | AC090403.1    |  |
| hsa-miR-107 | AC012123.1    |  |
| hsa-miR-107 | AC090220.1    |  |
| hsa-miR-107 | AC023043.4    |  |
| hsa-miR-107 | AC027097.2    |  |
| hsa-miR-107 | AC090236.2    |  |
| hsa-miR-107 | AC125437.2    |  |
| hsa-miR-107 | AC139100.2    |  |
| hsa-miR-107 | AC006538.3    |  |
| hsa-miR-107 | AC011444.2    |  |
| hsa-miR-107 | AC011471.3    |  |
| hsa-miR-107 | RAB11B-AS1    |  |
| hsa-miR-107 | ZNF426-DT     |  |
| hsa-miR-107 | ZNF561-AS1    |  |
| hsa-miR-107 | LINC00663     |  |
| hsa-miR-107 | AC011467.1    |  |
| hsa-miR-107 | LINC00662     |  |
| hsa-miR-107 | AC006504.5    |  |
| hsa-miR-107 | AC020910.4    |  |
| hsa-miR-107 | LINC01801     |  |
| hsa-miR-107 | AC002128.1    |  |
| hsa-miR-107 | TMEM147-AS1   |  |
| hsa-miR-107 | ZNF793-AS1    |  |
| hsa-miR-107 | LIPE-AS1      |  |
| hsa-miR-107 | AC021092.1    |  |
| hsa-miR-107 | AC073548.1    |  |
| hsa-miR-107 | AC010327.5    |  |
| hsa-miR-107 | AC005261.5    |  |
| hsa-miR-107 | AC012313.3    |  |
| hsa-miR-107 | AC012313.5    |  |
| hsa-miR-107 | SDCBP2-AS1    |  |
| hsa-miR-107 | ZNF337-AS1    |  |
| hsa-miR-107 | AL121832.3    |  |
| hsa-miR-107 | AF130359.1    |  |
| hsa-miR-107 | CBR3-AS1      |  |
| hsa-miR-107 | TRPM2-AS      |  |

|               |                |  |
|---------------|----------------|--|
| hsa-miR-107   | AC016026.1     |  |
| hsa-miR-107   | AC002470.2     |  |
| hsa-miR-107   | GUSBP11        |  |
| hsa-miR-107   | AP000347.2     |  |
| hsa-miR-107   | ADORA2A-AS1    |  |
| hsa-miR-107   | MIAT           |  |
| hsa-miR-107   | MIATNB         |  |
| hsa-miR-107   | TTC28-AS1      |  |
| hsa-miR-107   | AC003681.1     |  |
| hsa-miR-107   | Z95114.4       |  |
| hsa-miR-107   | AL021707.2     |  |
| hsa-miR-107   | AL021707.8     |  |
| hsa-miR-107   | Z95331.1       |  |
| hsa-miR-107   | MIRLET7BHG     |  |
| hsa-miR-107   | AL117329.1     |  |
| hsa-miR-107   | AC004656.1     |  |
| hsa-miR-107   | MED14OS        |  |
| hsa-miR-107   | AL157700.1     |  |
| hsa-miR-107   | XIST           |  |
| hsa-miR-107   | FTX            |  |
| hsa-miR-107   | Z83843.1       |  |
| hsa-miR-107   | LINC00630      |  |
| hsa-miR-107   | AL035425.3     |  |
| hsa-miR-107   | MIR503HG       |  |
| hsa-miR-107   | LINC00893      |  |
| hsa-miR-107   | LINC00894      |  |
| hsa-miR-1269a | LINC01128      |  |
| hsa-miR-1269a | AL645608.3     |  |
| hsa-miR-1269a | AL391244.1     |  |
| hsa-miR-1269a | LINC01134      |  |
| hsa-miR-1269a | MIR34AHG       |  |
| hsa-miR-1269a | AC254633.1     |  |
| hsa-miR-1269a | AL451042.2     |  |
| hsa-miR-1269a | LINC01772      |  |
| hsa-miR-1269a | PINK1-AS       |  |
| hsa-miR-1269a | AL662907.2     |  |
| hsa-miR-1269a | KDM4A-AS1      |  |
| hsa-miR-1269a | LINC01358      |  |
| hsa-miR-1269a | LINC01781      |  |
| hsa-miR-1269a | AC092807.3     |  |
| hsa-miR-1269a | AL160006.1     |  |
| hsa-miR-1269a | SLC16A1-AS1    |  |
| hsa-miR-1269a | LIX1L-AS1      |  |
| hsa-miR-1269a | RP4-565E6.1    |  |
| hsa-miR-1269a | CADM3-AS1      |  |
| hsa-miR-1269a | AL592435.1     |  |
| hsa-miR-1269a | CRYZL2P-SEC16B |  |
| hsa-miR-1269a | AL359853.3     |  |
| hsa-miR-1269a | MIR181A1HG     |  |
| hsa-miR-1269a | MIR29B2CHG     |  |
| hsa-miR-1269a | AL136379.1     |  |
| hsa-miR-1269a | AL359921.2     |  |
| hsa-miR-1269a | AL591623.1     |  |
| hsa-miR-1269a | AC231981.1     |  |
| hsa-miR-1269a | RN7SL832P      |  |
| hsa-miR-1269a | AL133243.3     |  |
| hsa-miR-1269a | AC007681.1     |  |
| hsa-miR-1269a | MIR4435-2HG    |  |
| hsa-miR-1269a | AC110769.1     |  |
| hsa-miR-1269a | AC073050.1     |  |
| hsa-miR-1269a | AC019080.1     |  |
| hsa-miR-1269a | AC007038.1     |  |
| hsa-miR-1269a | AC012513.3     |  |
| hsa-miR-1269a | AC012510.1     |  |
| hsa-miR-1269a | AC073052.2     |  |
| hsa-miR-1269a | AC009407.1     |  |
| hsa-miR-1269a | THUMP3-AS1     |  |
| hsa-miR-1269a | LINC00852      |  |
| hsa-miR-1269a | AC090948.2     |  |
| hsa-miR-1269a | AC006058.1     |  |
| hsa-miR-1269a | AC124045.1     |  |
| hsa-miR-1269a | AC104447.1     |  |
| hsa-miR-1269a | RASSF1-AS1     |  |

|               |                        |  |
|---------------|------------------------|--|
| hsa-miR-1269a | AC012467.2             |  |
| hsa-miR-1269a | DUBR                   |  |
| hsa-miR-1269a | AC112503.2             |  |
| hsa-miR-1269a | RUVBL1-AS1             |  |
| hsa-miR-1269a | AC073288.1             |  |
| hsa-miR-1269a | KCNMB2-AS1             |  |
| hsa-miR-1269a | AC139887.2             |  |
| hsa-miR-1269a | CTBP1-AS2              |  |
| hsa-miR-1269a | AC024230.1             |  |
| hsa-miR-1269a | AC107068.1             |  |
| hsa-miR-1269a | AC097478.1             |  |
| hsa-miR-1269a | AC010442.1             |  |
| hsa-miR-1269a | BASPI-AS1              |  |
| hsa-miR-1269a | AC104118.1             |  |
| hsa-miR-1269a | LINC00461              |  |
| hsa-miR-1269a | MIR3936HG              |  |
| hsa-miR-1269a | C5orf66-AS2            |  |
| hsa-miR-1269a | AC011389.1             |  |
| hsa-miR-1269a | AL035587.1             |  |
| hsa-miR-1269a | LINC00472              |  |
| hsa-miR-1269a | LINC01010              |  |
| hsa-miR-1269a | AL354892.3             |  |
| hsa-miR-1269a | AC004691.1             |  |
| hsa-miR-1269a | AC018647.2             |  |
| hsa-miR-1269a | LINC00265              |  |
| hsa-miR-1269a | AC118758.3             |  |
| hsa-miR-1269a | LINC00174              |  |
| hsa-miR-1269a | AC004491.1             |  |
| hsa-miR-1269a | MAG12-AS3              |  |
| hsa-miR-1269a | STAG3L5P-PVRIG2P-PILRB |  |
| hsa-miR-1269a | AC004492.1             |  |
| hsa-miR-1269a | LINC02476              |  |
| hsa-miR-1269a | AC016831.5             |  |
| hsa-miR-1269a | MKLN1-AS               |  |
| hsa-miR-1269a | AC008264.2             |  |
| hsa-miR-1269a | LINC01287              |  |
| hsa-miR-1269a | AC037459.3             |  |
| hsa-miR-1269a | HMBOX1-IT1             |  |
| hsa-miR-1269a | GASAL1                 |  |
| hsa-miR-1269a | CASC19                 |  |
| hsa-miR-1269a | PEG13                  |  |
| hsa-miR-1269a | AC011676.5             |  |
| hsa-miR-1269a | AL589843.1             |  |
| hsa-miR-1269a | AL358074.1             |  |
| hsa-miR-1269a | AL355987.4             |  |
| hsa-miR-1269a | AL157392.3             |  |
| hsa-miR-1269a | AL359532.1             |  |
| hsa-miR-1269a | RP11-592B15.3          |  |
| hsa-miR-1269a | AL132656.3             |  |
| hsa-miR-1269a | NUTM2B-AS1             |  |
| hsa-miR-1269a | AL731569.1             |  |
| hsa-miR-1269a | AL136982.1             |  |
| hsa-miR-1269a | AGAP11                 |  |
| hsa-miR-1269a | RPARP-AS1              |  |
| hsa-miR-1269a | KCNQ10T1               |  |
| hsa-miR-1269a | LINC02547              |  |
| hsa-miR-1269a | AC090833.1             |  |
| hsa-miR-1269a | AP002748.3             |  |
| hsa-miR-1269a | AP001157.1             |  |
| hsa-miR-1269a | AP000590.1             |  |
| hsa-miR-1269a | AP002761.4             |  |
| hsa-miR-1269a | AP003119.3             |  |
| hsa-miR-1269a | AP002840.2             |  |
| hsa-miR-1269a | BACE1-AS               |  |
| hsa-miR-1269a | AP001318.2             |  |
| hsa-miR-1269a | LOH12CR2               |  |
| hsa-miR-1269a | RASSF8-AS1             |  |
| hsa-miR-1269a | AC022364.1             |  |
| hsa-miR-1269a | AC079684.1             |  |
| hsa-miR-1269a | AC008124.1             |  |
| hsa-miR-1269a | AC025031.4             |  |
| hsa-miR-1269a | AC074032.1             |  |
| hsa-miR-1269a | AC025423.4             |  |

|               |             |  |
|---------------|-------------|--|
| hsa-miR-1269a | AC090502.1  |  |
| hsa-miR-1269a | HELLPAR     |  |
| hsa-miR-1269a | NRAV        |  |
| hsa-miR-1269a | AC131212.3  |  |
| hsa-miR-1269a | AL161772.1  |  |
| hsa-miR-1269a | N4BP2L2-IT2 |  |
| hsa-miR-1269a | AL137782.1  |  |
| hsa-miR-1269a | RBM26-AS1   |  |
| hsa-miR-1269a | AL161431.1  |  |
| hsa-miR-1269a | AL442125.1  |  |
| hsa-miR-1269a | LINC00641   |  |
| hsa-miR-1269a | AL138974.1  |  |
| hsa-miR-1269a | LINC02313   |  |
| hsa-miR-1269a | LINC00648   |  |
| hsa-miR-1269a | AL627171.1  |  |
| hsa-miR-1269a | PSMA3-AS1   |  |
| hsa-miR-1269a | AL162171.3  |  |
| hsa-miR-1269a | MEG8        |  |
| hsa-miR-1269a | AL117190.1  |  |
| hsa-miR-1269a | SNHG14      |  |
| hsa-miR-1269a | PWAR5       |  |
| hsa-miR-1269a | PWAR6       |  |
| hsa-miR-1269a | ARHGAP11B   |  |
| hsa-miR-1269a | AC116158.1  |  |
| hsa-miR-1269a | AC090510.2  |  |
| hsa-miR-1269a | GABPB1-IT1  |  |
| hsa-miR-1269a | AC007950.2  |  |
| hsa-miR-1269a | AC116913.1  |  |
| hsa-miR-1269a | AC110048.2  |  |
| hsa-miR-1269a | AC090826.1  |  |
| hsa-miR-1269a | LINC01578   |  |
| hsa-miR-1269a | AC022819.1  |  |
| hsa-miR-1269a | Z92544.2    |  |
| hsa-miR-1269a | ERVK13-1    |  |
| hsa-miR-1269a | AC092117.2  |  |
| hsa-miR-1269a | SRRM2-AS1   |  |
| hsa-miR-1269a | MIR762HG    |  |
| hsa-miR-1269a | FBXL19-AS1  |  |
| hsa-miR-1269a | AC026471.4  |  |
| hsa-miR-1269a | AC009102.2  |  |
| hsa-miR-1269a | AC025287.1  |  |
| hsa-miR-1269a | AC092139.3  |  |
| hsa-miR-1269a | AC092135.1  |  |
| hsa-miR-1269a | AC009063.2  |  |
| hsa-miR-1269a | MYHAS       |  |
| hsa-miR-1269a | AC126365.1  |  |
| hsa-miR-1269a | AC127024.8  |  |
| hsa-miR-1269a | AC004585.1  |  |
| hsa-miR-1269a | AC067852.3  |  |
| hsa-miR-1269a | ASB16-AS1   |  |
| hsa-miR-1269a | MAPT-IT1    |  |
| hsa-miR-1269a | AC007485.2  |  |
| hsa-miR-1269a | CTC-462L7.1 |  |
| hsa-miR-1269a | AC015813.6  |  |
| hsa-miR-1269a | AC005332.7  |  |
| hsa-miR-1269a | TEN1-CDK3   |  |
| hsa-miR-1269a | SNHG16      |  |
| hsa-miR-1269a | AC111170.2  |  |
| hsa-miR-1269a | AC110285.1  |  |
| hsa-miR-1269a | AC139530.3  |  |
| hsa-miR-1269a | AC145207.5  |  |
| hsa-miR-1269a | AC132872.4  |  |
| hsa-miR-1269a | AC132872.1  |  |
| hsa-miR-1269a | AP005057.1  |  |
| hsa-miR-1269a | AP001793.1  |  |
| hsa-miR-1269a | AP005131.6  |  |
| hsa-miR-1269a | AC090241.3  |  |
| hsa-miR-1269a | LINC01415   |  |
| hsa-miR-1269a | AC036176.1  |  |
| hsa-miR-1269a | AC093330.2  |  |
| hsa-miR-1269a | AC114271.1  |  |
| hsa-miR-1269a | ZNF433-AS1  |  |
| hsa-miR-1269a | AC011446.2  |  |

|               |             |  |
|---------------|-------------|--|
| hsa-miR-1269a | AC092329.4  |  |
| hsa-miR-1269a | LINC01224   |  |
| hsa-miR-1269a | AC092279.1  |  |
| hsa-miR-1269a | TMEM147-AS1 |  |
| hsa-miR-1269a | ZNF571-AS1  |  |
| hsa-miR-1269a | AC118344.1  |  |
| hsa-miR-1269a | AC118344.2  |  |
| hsa-miR-1269a | AC011462.2  |  |
| hsa-miR-1269a | AC010247.2  |  |
| hsa-miR-1269a | AC005261.1  |  |
| hsa-miR-1269a | AC012313.1  |  |
| hsa-miR-1269a | AC012313.5  |  |
| hsa-miR-1269a | SDCBP2-AS1  |  |
| hsa-miR-1269a | AL109976.1  |  |
| hsa-miR-1269a | AL121906.2  |  |
| hsa-miR-1269a | AL121753.2  |  |
| hsa-miR-1269a | AL391095.3  |  |
| hsa-miR-1269a | SNHG17      |  |
| hsa-miR-1269a | AL132655.1  |  |
| hsa-miR-1269a | BACH1-IT1   |  |
| hsa-miR-1269a | AC006946.2  |  |
| hsa-miR-1269a | LINC01311   |  |
| hsa-miR-1269a | AC002470.2  |  |
| hsa-miR-1269a | GUSBP11     |  |
| hsa-miR-1269a | LINC01422   |  |
| hsa-miR-1269a | AL022313.4  |  |
| hsa-miR-1269a | AL021707.3  |  |
| hsa-miR-1269a | Z95331.1    |  |
| hsa-miR-1269a | MIRLET7BHG  |  |
| hsa-miR-1269a | AL117329.1  |  |
| hsa-miR-1269a | BX890604.1  |  |
| hsa-miR-1269a | FAM239B     |  |
| hsa-miR-1269a | AC073529.1  |  |
| hsa-miR-1269a | AC004656.1  |  |
| hsa-miR-1269a | LINC01278   |  |
| hsa-miR-1269a | XIST        |  |
| hsa-miR-320b  | AL391244.1  |  |
| hsa-miR-320b  | MIR34AHG    |  |
| hsa-miR-320b  | BX284668.2  |  |
| hsa-miR-320b  | SNHG12      |  |
| hsa-miR-320b  | AL139260.2  |  |
| hsa-miR-320b  | AL031985.3  |  |
| hsa-miR-320b  | LINC01748   |  |
| hsa-miR-320b  | MIR137HG    |  |
| hsa-miR-320b  | AL049557.1  |  |
| hsa-miR-320b  | SLC16A1-AS1 |  |
| hsa-miR-320b  | AC239809.3  |  |
| hsa-miR-320b  | LINC01138   |  |
| hsa-miR-320b  | AL590133.2  |  |
| hsa-miR-320b  | AL162258.1  |  |
| hsa-miR-320b  | AL590666.1  |  |
| hsa-miR-320b  | GAS5        |  |
| hsa-miR-320b  | AL359265.3  |  |
| hsa-miR-320b  | AL356273.3  |  |
| hsa-miR-320b  | AL358473.1  |  |
| hsa-miR-320b  | MIR29B2CHG  |  |
| hsa-miR-320b  | AL592402.1  |  |
| hsa-miR-320b  | AC011700.1  |  |
| hsa-miR-320b  | AL365184.1  |  |
| hsa-miR-320b  | LINC01341   |  |
| hsa-miR-320b  | AC141930.2  |  |
| hsa-miR-320b  | LINC01814   |  |
| hsa-miR-320b  | AC104794.3  |  |
| hsa-miR-320b  | C2orf48     |  |
| hsa-miR-320b  | AC092687.3  |  |
| hsa-miR-320b  | AL133243.2  |  |
| hsa-miR-320b  | LINC02576   |  |
| hsa-miR-320b  | LINC01829   |  |
| hsa-miR-320b  | ALMS1-IT1   |  |
| hsa-miR-320b  | BOLA3-AS1   |  |
| hsa-miR-320b  | AC005034.3  |  |
| hsa-miR-320b  | AC233266.2  |  |
| hsa-miR-320b  | LINC00342   |  |



|              |             |  |
|--------------|-------------|--|
| hsa-miR-320b | LINC01885   |  |
| hsa-miR-320b | MIR4435-2HG |  |
| hsa-miR-320b | AC079753.1  |  |
| hsa-miR-320b | PAX8-AS1    |  |
| hsa-miR-320b | AC009299.3  |  |
| hsa-miR-320b | AC007405.1  |  |
| hsa-miR-320b | AC007405.3  |  |
| hsa-miR-320b | AC019080.1  |  |
| hsa-miR-320b | AC012499.1  |  |
| hsa-miR-320b | AC009948.1  |  |
| hsa-miR-320b | TTN-AS1     |  |
| hsa-miR-320b | AC009962.1  |  |
| hsa-miR-320b | AC007966.1  |  |
| hsa-miR-320b | AC017101.1  |  |
| hsa-miR-320b | AC007383.3  |  |
| hsa-miR-320b | LINC01963   |  |
| hsa-miR-320b | AC012510.1  |  |
| hsa-miR-320b | AC067956.1  |  |
| hsa-miR-320b | THUMPD3-AS1 |  |
| hsa-miR-320b | GHRLS       |  |
| hsa-miR-320b | FGD5-AS1    |  |
| hsa-miR-320b | SH3BP5-AS1  |  |
| hsa-miR-320b | KIF9-AS1    |  |
| hsa-miR-320b | ZMYND10-AS1 |  |
| hsa-miR-320b | AC073352.1  |  |
| hsa-miR-320b | AC022336.3  |  |
| hsa-miR-320b | AC092902.2  |  |
| hsa-miR-320b | LINC01471   |  |
| hsa-miR-320b | MBNL1-AS1   |  |
| hsa-miR-320b | KCNMB2-AS1  |  |
| hsa-miR-320b | SOX2-OT     |  |
| hsa-miR-320b | MCCC1-AS1   |  |
| hsa-miR-320b | AC005674.2  |  |
| hsa-miR-320b | AL136537.2  |  |
| hsa-miR-320b | AC093725.1  |  |
| hsa-miR-320b | AC124016.1  |  |
| hsa-miR-320b | THAP9-AS1   |  |
| hsa-miR-320b | AP002026.1  |  |
| hsa-miR-320b | RPL34-AS1   |  |
| hsa-miR-320b | AC093908.1  |  |
| hsa-miR-320b | MIR4453HG   |  |
| hsa-miR-320b | AC104083.1  |  |
| hsa-miR-320b | HAND2-AS1   |  |
| hsa-miR-320b | AC093909.6  |  |
| hsa-miR-320b | AC021087.3  |  |
| hsa-miR-320b | MIR4458HG   |  |
| hsa-miR-320b | LINC01194   |  |
| hsa-miR-320b | AC139792.3  |  |
| hsa-miR-320b | AC025171.2  |  |
| hsa-miR-320b | NNT-AS1     |  |
| hsa-miR-320b | AC010478.1  |  |
| hsa-miR-320b | AC024581.1  |  |
| hsa-miR-320b | LUCAT1      |  |
| hsa-miR-320b | NR2F1-AS1   |  |
| hsa-miR-320b | AC099520.1  |  |
| hsa-miR-320b | LINC00992   |  |
| hsa-miR-320b | AC008669.1  |  |
| hsa-miR-320b | LINC01184   |  |
| hsa-miR-320b | AC244517.1  |  |
| hsa-miR-320b | AC021078.1  |  |
| hsa-miR-320b | MIR3142HG   |  |
| hsa-miR-320b | AC022217.3  |  |
| hsa-miR-320b | ZNF346-IT1  |  |
| hsa-miR-320b | GMDS-AS1    |  |
| hsa-miR-320b | AL031963.1  |  |
| hsa-miR-320b | AL359643.3  |  |
| hsa-miR-320b | AL031775.1  |  |
| hsa-miR-320b | Z97832.2    |  |
| hsa-miR-320b | AL512274.1  |  |
| hsa-miR-320b | AL096865.1  |  |
| hsa-miR-320b | TRAM2-AS1   |  |
| hsa-miR-320b | AL049555.1  |  |
| hsa-miR-320b | AL136164.3  |  |

|              |                        |  |
|--------------|------------------------|--|
| hsa-miR-320b | LINC00472              |  |
| hsa-miR-320b | MANEA-AS1              |  |
| hsa-miR-320b | AL513550.1             |  |
| hsa-miR-320b | LINC02532              |  |
| hsa-miR-320b | TRAF3IP2-AS1           |  |
| hsa-miR-320b | AL356124.1             |  |
| hsa-miR-320b | AL031320.2             |  |
| hsa-miR-320b | AL080276.2             |  |
| hsa-miR-320b | LINC00473              |  |
| hsa-miR-320b | AC091729.3             |  |
| hsa-miR-320b | AC006041.1             |  |
| hsa-miR-320b | AC005154.1             |  |
| hsa-miR-320b | LINC00997              |  |
| hsa-miR-320b | TRG-AS1                |  |
| hsa-miR-320b | AC017116.1             |  |
| hsa-miR-320b | AC118758.3             |  |
| hsa-miR-320b | LINC00174              |  |
| hsa-miR-320b | AC073335.2             |  |
| hsa-miR-320b | APTR                   |  |
| hsa-miR-320b | MAG12-AS3              |  |
| hsa-miR-320b | AC000120.1             |  |
| hsa-miR-320b | STAG3L5P-PVRIG2P-PILRB |  |
| hsa-miR-320b | AC069281.2             |  |
| hsa-miR-320b | ST7-OT4                |  |
| hsa-miR-320b | SND1-IT1               |  |
| hsa-miR-320b | AC090114.2             |  |
| hsa-miR-320b | AC016831.1             |  |
| hsa-miR-320b | AC016831.7             |  |
| hsa-miR-320b | ATP6V0E2-AS1           |  |
| hsa-miR-320b | AC144652.1             |  |
| hsa-miR-320b | LINC00689              |  |
| hsa-miR-320b | AC016065.1             |  |
| hsa-miR-320b | AF131216.3             |  |
| hsa-miR-320b | EXTL3-AS1              |  |
| hsa-miR-320b | AC102945.2             |  |
| hsa-miR-320b | AC090152.1             |  |
| hsa-miR-320b | MIR124-2HG             |  |
| hsa-miR-320b | AC018616.1             |  |
| hsa-miR-320b | LINC01419              |  |
| hsa-miR-320b | AC090198.1             |  |
| hsa-miR-320b | PEG13                  |  |
| hsa-miR-320b | CDC37L1-AS1            |  |
| hsa-miR-320b | FAM201A                |  |
| hsa-miR-320b | AL158152.1             |  |
| hsa-miR-320b | NAMA                   |  |
| hsa-miR-320b | FAM225A                |  |
| hsa-miR-320b | AL162724.1             |  |
| hsa-miR-320b | AL441992.1             |  |
| hsa-miR-320b | LINC00963              |  |
| hsa-miR-320b | DBH-AS1                |  |
| hsa-miR-320b | CCDC183-AS1            |  |
| hsa-miR-320b | AL355987.4             |  |
| hsa-miR-320b | AL390294.1             |  |
| hsa-miR-320b | AC073367.1             |  |
| hsa-miR-320b | AL359697.1             |  |
| hsa-miR-320b | WAC-AS1                |  |
| hsa-miR-320b | AL353796.1             |  |
| hsa-miR-320b | AC022400.3             |  |
| hsa-miR-320b | BMS1P4                 |  |
| hsa-miR-320b | ZNF503-AS2             |  |
| hsa-miR-320b | AC010997.6             |  |
| hsa-miR-320b | NUTM2B-AS1             |  |
| hsa-miR-320b | AL158212.3             |  |
| hsa-miR-320b | AL391988.1             |  |
| hsa-miR-320b | AL139407.1             |  |
| hsa-miR-320b | AL162274.3             |  |
| hsa-miR-320b | AC124057.1             |  |
| hsa-miR-320b | KCNQ1OT1               |  |
| hsa-miR-320b | AC022762.2             |  |
| hsa-miR-320b | MRV11-AS1              |  |
| hsa-miR-320b | LINC00294              |  |
| hsa-miR-320b | SNHG1                  |  |
| hsa-miR-320b | NEAT1                  |  |

|              |              |  |
|--------------|--------------|--|
| hsa-miR-320b | MALAT1       |  |
| hsa-miR-320b | AP000808.1   |  |
| hsa-miR-320b | AP002490.1   |  |
| hsa-miR-320b | AP001922.6   |  |
| hsa-miR-320b | AP002360.1   |  |
| hsa-miR-320b | AP000941.1   |  |
| hsa-miR-320b | LINC00167    |  |
| hsa-miR-320b | AC007406.5   |  |
| hsa-miR-320b | AC005912.2   |  |
| hsa-miR-320b | AC010186.3   |  |
| hsa-miR-320b | AC008124.1   |  |
| hsa-miR-320b | AC025031.5   |  |
| hsa-miR-320b | AC004466.2   |  |
| hsa-miR-320b | AC023509.1   |  |
| hsa-miR-320b | AC012531.1   |  |
| hsa-miR-320b | AC023794.7   |  |
| hsa-miR-320b | AC026124.1   |  |
| hsa-miR-320b | AC090061.1   |  |
| hsa-miR-320b | AC020656.2   |  |
| hsa-miR-320b | TMPO-AS1     |  |
| hsa-miR-320b | HELLPAR      |  |
| hsa-miR-320b | AC144548.1   |  |
| hsa-miR-320b | PXN-AS1      |  |
| hsa-miR-320b | AC069234.3   |  |
| hsa-miR-320b | HNF1A-AS1    |  |
| hsa-miR-320b | LINC01089    |  |
| hsa-miR-320b | AC027290.2   |  |
| hsa-miR-320b | AC068790.3   |  |
| hsa-miR-320b | AC073592.7   |  |
| hsa-miR-320b | AL161772.1   |  |
| hsa-miR-320b | AL138820.1   |  |
| hsa-miR-320b | AL138999.1   |  |
| hsa-miR-320b | TPT1-AS1     |  |
| hsa-miR-320b | LINC00562    |  |
| hsa-miR-320b | DLEU1        |  |
| hsa-miR-320b | RNASEH2B-AS1 |  |
| hsa-miR-320b | AL137782.1   |  |
| hsa-miR-320b | RBM26-AS1    |  |
| hsa-miR-320b | LINC00346    |  |
| hsa-miR-320b | AL442125.1   |  |
| hsa-miR-320b | LINC00641    |  |
| hsa-miR-320b | AL132780.4   |  |
| hsa-miR-320b | ZFHX2-AS1    |  |
| hsa-miR-320b | DHRS4-AS1    |  |
| hsa-miR-320b | AL162311.3   |  |
| hsa-miR-320b | LINC00648    |  |
| hsa-miR-320b | FRMD6-AS1    |  |
| hsa-miR-320b | PSMA3-AS1    |  |
| hsa-miR-320b | LINC01303    |  |
| hsa-miR-320b | AC004846.2   |  |
| hsa-miR-320b | AC016526.3   |  |
| hsa-miR-320b | AL049775.1   |  |
| hsa-miR-320b | MEG3         |  |
| hsa-miR-320b | SNHG14       |  |
| hsa-miR-320b | AC124303.1   |  |
| hsa-miR-320b | AC019278.1   |  |
| hsa-miR-320b | AC113146.1   |  |
| hsa-miR-320b | RAD51-AS1    |  |
| hsa-miR-320b | OIP5-AS1     |  |
| hsa-miR-320b | GABPB1-IT1   |  |
| hsa-miR-320b | DNAAF4-CCPG1 |  |
| hsa-miR-320b | AC011939.2   |  |
| hsa-miR-320b | AC116913.1   |  |
| hsa-miR-320b | AC100827.4   |  |
| hsa-miR-320b | NPTN-IT1     |  |
| hsa-miR-320b | AC090826.2   |  |
| hsa-miR-320b | AC068338.2   |  |
| hsa-miR-320b | AC090181.2   |  |
| hsa-miR-320b | AC021739.3   |  |
| hsa-miR-320b | MIR9-3HG     |  |
| hsa-miR-320b | ZNF710-AS1   |  |
| hsa-miR-320b | NR2F2-AS1    |  |
| hsa-miR-320b | AC015712.2   |  |

|              |             |  |
|--------------|-------------|--|
| hsa-miR-320b | Z92544.2    |  |
| hsa-miR-320b | AL133297.2  |  |
| hsa-miR-320b | ERVK13-1    |  |
| hsa-miR-320b | MMP25-AS1   |  |
| hsa-miR-320b | ZNF213-AS1  |  |
| hsa-miR-320b | AC131649.2  |  |
| hsa-miR-320b | AC007216.4  |  |
| hsa-miR-320b | AC127459.3  |  |
| hsa-miR-320b | AC008741.2  |  |
| hsa-miR-320b | RRN3P2      |  |
| hsa-miR-320b | AC009133.1  |  |
| hsa-miR-320b | AC120114.2  |  |
| hsa-miR-320b | AC007490.1  |  |
| hsa-miR-320b | AC020978.7  |  |
| hsa-miR-320b | AC009032.1  |  |
| hsa-miR-320b | LINC01572   |  |
| hsa-miR-320b | AC004943.2  |  |
| hsa-miR-320b | AC002044.1  |  |
| hsa-miR-320b | AC009120.2  |  |
| hsa-miR-320b | AC092718.4  |  |
| hsa-miR-320b | AC113189.4  |  |
| hsa-miR-320b | AC016876.2  |  |
| hsa-miR-320b | AC233702.9  |  |
| hsa-miR-320b | AC005899.8  |  |
| hsa-miR-320b | AC004408.2  |  |
| hsa-miR-320b | AC099811.1  |  |
| hsa-miR-320b | AC099811.5  |  |
| hsa-miR-320b | AC067852.1  |  |
| hsa-miR-320b | LINC00910   |  |
| hsa-miR-320b | ASB16-AS1   |  |
| hsa-miR-320b | MAPT-IT1    |  |
| hsa-miR-320b | AC103702.1  |  |
| hsa-miR-320b | AC015909.5  |  |
| hsa-miR-320b | AC007485.2  |  |
| hsa-miR-320b | AC091181.1  |  |
| hsa-miR-320b | AC015813.1  |  |
| hsa-miR-320b | AC015813.6  |  |
| hsa-miR-320b | AC091271.1  |  |
| hsa-miR-320b | AC005746.1  |  |
| hsa-miR-320b | AC005821.1  |  |
| hsa-miR-320b | AC068512.1  |  |
| hsa-miR-320b | AC005332.7  |  |
| hsa-miR-320b | SOX9-AS1    |  |
| hsa-miR-320b | AC111170.3  |  |
| hsa-miR-320b | BAIAP2-AS1  |  |
| hsa-miR-320b | AC145207.5  |  |
| hsa-miR-320b | AP001005.3  |  |
| hsa-miR-320b | AP000845.1  |  |
| hsa-miR-320b | TYMSOS      |  |
| hsa-miR-320b | AP000894.4  |  |
| hsa-miR-320b | DLGAP1-AS2  |  |
| hsa-miR-320b | LINC00667   |  |
| hsa-miR-320b | AP005432.1  |  |
| hsa-miR-320b | AP005131.7  |  |
| hsa-miR-320b | AC105114.1  |  |
| hsa-miR-320b | AC007996.1  |  |
| hsa-miR-320b | AC023043.4  |  |
| hsa-miR-320b | AC022031.1  |  |
| hsa-miR-320b | AC105105.2  |  |
| hsa-miR-320b | LINC00909   |  |
| hsa-miR-320b | AC134978.1  |  |
| hsa-miR-320b | RBFADN      |  |
| hsa-miR-320b | AC136469.2  |  |
| hsa-miR-320b | ILF3-AS1    |  |
| hsa-miR-320b | AC020916.1  |  |
| hsa-miR-320b | AC003956.1  |  |
| hsa-miR-320b | AC020917.4  |  |
| hsa-miR-320b | LINC00663   |  |
| hsa-miR-320b | AC092279.2  |  |
| hsa-miR-320b | TMEM147-AS1 |  |
| hsa-miR-320b | LIPE-AS1    |  |
| hsa-miR-320b | AC007191.1  |  |
| hsa-miR-320b | AC008895.1  |  |

|              |             |  |
|--------------|-------------|--|
| hsa-miR-320b | AC008403.3  |  |
| hsa-miR-320b | AC022150.4  |  |
| hsa-miR-320b | AC004076.2  |  |
| hsa-miR-320b | AC012313.8  |  |
| hsa-miR-320b | SDCBP2-AS1  |  |
| hsa-miR-320b | CASC20      |  |
| hsa-miR-320b | AL161658.1  |  |
| hsa-miR-320b | LINC00261   |  |
| hsa-miR-320b | AL031673.1  |  |
| hsa-miR-320b | AL121832.3  |  |
| hsa-miR-320b | AL118506.1  |  |
| hsa-miR-320b | AP000251.1  |  |
| hsa-miR-320b | LINC01547   |  |
| hsa-miR-320b | MCM3AP-AS1  |  |
| hsa-miR-320b | AC016026.1  |  |
| hsa-miR-320b | GUSBP11     |  |
| hsa-miR-320b | AP000355.1  |  |
| hsa-miR-320b | AL008721.2  |  |
| hsa-miR-320b | MIAT        |  |
| hsa-miR-320b | LINC01638   |  |
| hsa-miR-320b | TTC28-AS1   |  |
| hsa-miR-320b | AC003681.1  |  |
| hsa-miR-320b | TUG1        |  |
| hsa-miR-320b | LINC01521   |  |
| hsa-miR-320b | AL021877.2  |  |
| hsa-miR-320b | AL022311.1  |  |
| hsa-miR-320b | AL021707.1  |  |
| hsa-miR-320b | AL031595.3  |  |
| hsa-miR-320b | MIRLET7BHG  |  |
| hsa-miR-320b | AC004656.1  |  |
| hsa-miR-320b | MIR222HG    |  |
| hsa-miR-320b | XIST        |  |
| hsa-miR-320b | FTX         |  |
| hsa-miR-320b | AL035425.4  |  |
| hsa-miR-320b | AC244090.3  |  |
| hsa-miR-320b | TTY15       |  |
| hsa-miR-326  | AL645608.3  |  |
| hsa-miR-326  | AL645608.1  |  |
| hsa-miR-326  | AL645608.9  |  |
| hsa-miR-326  | AL162741.1  |  |
| hsa-miR-326  | AL391244.1  |  |
| hsa-miR-326  | AL691432.2  |  |
| hsa-miR-326  | AL031282.2  |  |
| hsa-miR-326  | LINC00982   |  |
| hsa-miR-326  | AL512383.1  |  |
| hsa-miR-326  | AL513320.1  |  |
| hsa-miR-326  | LINC01134   |  |
| hsa-miR-326  | BX284668.5  |  |
| hsa-miR-326  | PINK1-AS    |  |
| hsa-miR-326  | LINC01355   |  |
| hsa-miR-326  | AL021154.1  |  |
| hsa-miR-326  | SNHG3       |  |
| hsa-miR-326  | SNHG12      |  |
| hsa-miR-326  | AL662907.1  |  |
| hsa-miR-326  | AL662907.2  |  |
| hsa-miR-326  | AL513327.1  |  |
| hsa-miR-326  | AL139260.1  |  |
| hsa-miR-326  | SLFNL1-AS1  |  |
| hsa-miR-326  | KDM4A-AS1   |  |
| hsa-miR-326  | FOXD2-AS1   |  |
| hsa-miR-326  | AL355483.1  |  |
| hsa-miR-326  | AL357673.2  |  |
| hsa-miR-326  | LINC01748   |  |
| hsa-miR-326  | LINC01359   |  |
| hsa-miR-326  | AL590094.1  |  |
| hsa-miR-326  | AC095033.1  |  |
| hsa-miR-326  | MIR137HG    |  |
| hsa-miR-326  | AL359258.2  |  |
| hsa-miR-326  | AL359258.3  |  |
| hsa-miR-326  | AL356488.3  |  |
| hsa-miR-326  | AL160006.1  |  |
| hsa-miR-326  | SLC16A1-AS1 |  |
| hsa-miR-326  | AL359915.2  |  |

|             |                 |  |
|-------------|-----------------|--|
| hsa-miR-326 | RP6-42F4.1      |  |
| hsa-miR-326 | LIX1L-AS1       |  |
| hsa-miR-326 | AC239809.3      |  |
| hsa-miR-326 | RP4-565E6.1     |  |
| hsa-miR-326 | XXyac-YX155B6.6 |  |
| hsa-miR-326 | ADAMTSL4-AS1    |  |
| hsa-miR-326 | AL162258.1      |  |
| hsa-miR-326 | AL162258.2      |  |
| hsa-miR-326 | RUSC1-AS1       |  |
| hsa-miR-326 | AL365181.2      |  |
| hsa-miR-326 | AL365181.3      |  |
| hsa-miR-326 | KIRREL1-IT1     |  |
| hsa-miR-326 | AL031733.2      |  |
| hsa-miR-326 | AL353708.1      |  |
| hsa-miR-326 | AL162431.2      |  |
| hsa-miR-326 | PCAT6           |  |
| hsa-miR-326 | AL445493.2      |  |
| hsa-miR-326 | MIR29B2CHG      |  |
| hsa-miR-326 | PROX1-AS1       |  |
| hsa-miR-326 | AC093152.1      |  |
| hsa-miR-326 | AL670729.1      |  |
| hsa-miR-326 | AL359921.2      |  |
| hsa-miR-326 | AL359924.1      |  |
| hsa-miR-326 | C2orf48         |  |
| hsa-miR-326 | RN7SL832P       |  |
| hsa-miR-326 | AC104695.4      |  |
| hsa-miR-326 | AC016747.4      |  |
| hsa-miR-326 | PCBP1-AS1       |  |
| hsa-miR-326 | LINC01159       |  |
| hsa-miR-326 | MIR4435-2HG     |  |
| hsa-miR-326 | AC079753.1      |  |
| hsa-miR-326 | PAX8-AS1        |  |
| hsa-miR-326 | AC114763.1      |  |
| hsa-miR-326 | LINC01876       |  |
| hsa-miR-326 | HAGLR           |  |
| hsa-miR-326 | HAGLROS         |  |
| hsa-miR-326 | AC007383.4      |  |
| hsa-miR-326 | AC007038.1      |  |
| hsa-miR-326 | AC012513.3      |  |
| hsa-miR-326 | AC005538.2      |  |
| hsa-miR-326 | AC012485.1      |  |
| hsa-miR-326 | AC110619.1      |  |
| hsa-miR-326 | GHRLOS          |  |
| hsa-miR-326 | AC097639.1      |  |
| hsa-miR-326 | EIF1B-AS1       |  |
| hsa-miR-326 | KIF9-AS1        |  |
| hsa-miR-326 | U73166.1        |  |
| hsa-miR-326 | Z84492.1        |  |
| hsa-miR-326 | AC115284.1      |  |
| hsa-miR-326 | AC096887.2      |  |
| hsa-miR-326 | PSMD6-AS2       |  |
| hsa-miR-326 | FOXPI-AS1       |  |
| hsa-miR-326 | LINC00960       |  |
| hsa-miR-326 | LINC02035       |  |
| hsa-miR-326 | AC022336.3      |  |
| hsa-miR-326 | AC112484.3      |  |
| hsa-miR-326 | H1FX-AS1        |  |
| hsa-miR-326 | LINC02004       |  |
| hsa-miR-326 | AC097103.2      |  |
| hsa-miR-326 | AC021074.3      |  |
| hsa-miR-326 | AC107021.2      |  |
| hsa-miR-326 | ARHGEF26-AS1    |  |
| hsa-miR-326 | LINC02043       |  |
| hsa-miR-326 | LPP-AS2         |  |
| hsa-miR-326 | NOP14-AS1       |  |
| hsa-miR-326 | AFAP1-AS1       |  |
| hsa-miR-326 | AC005674.2      |  |
| hsa-miR-326 | CPEB2-AS1       |  |
| hsa-miR-326 | TAPT1-AS1       |  |
| hsa-miR-326 | AC107398.3      |  |
| hsa-miR-326 | AP002026.1      |  |
| hsa-miR-326 | AC108062.1      |  |
| hsa-miR-326 | AC097376.2      |  |

|             |                         |  |
|-------------|-------------------------|--|
| hsa-miR-326 | HAND2-AS1               |  |
| hsa-miR-326 | AC097652.1              |  |
| hsa-miR-326 | EXOC3-AS1               |  |
| hsa-miR-326 | AC026740.1              |  |
| hsa-miR-326 | AC034229.2              |  |
| hsa-miR-326 | AC034229.3              |  |
| hsa-miR-326 | AC008957.3              |  |
| hsa-miR-326 | AC025171.2              |  |
| hsa-miR-326 | AC008966.1              |  |
| hsa-miR-326 | AC010359.1              |  |
| hsa-miR-326 | AC093535.2              |  |
| hsa-miR-326 | C5orf66                 |  |
| hsa-miR-326 | CXXC5-AS1               |  |
| hsa-miR-326 | CARMN                   |  |
| hsa-miR-326 | AC008443.1              |  |
| hsa-miR-326 | GMDS-AS1                |  |
| hsa-miR-326 | LINC01011               |  |
| hsa-miR-326 | AL590004.4              |  |
| hsa-miR-326 | HCP5                    |  |
| hsa-miR-326 | AL592158.1              |  |
| hsa-miR-326 | AL512274.1              |  |
| hsa-miR-326 | AL354719.2              |  |
| hsa-miR-326 | AL160262.1              |  |
| hsa-miR-326 | LINC00472               |  |
| hsa-miR-326 | AC019205.1              |  |
| hsa-miR-326 | AL359715.3              |  |
| hsa-miR-326 | AL023284.4              |  |
| hsa-miR-326 | LINC00473               |  |
| hsa-miR-326 | PSMG3-AS1               |  |
| hsa-miR-326 | AC092171.5              |  |
| hsa-miR-326 | AC092171.2              |  |
| hsa-miR-326 | RNF216-IT1              |  |
| hsa-miR-326 | POLR2J4                 |  |
| hsa-miR-326 | AC004951.1              |  |
| hsa-miR-326 | AC017116.1              |  |
| hsa-miR-326 | AC073335.2              |  |
| hsa-miR-326 | AC005089.1              |  |
| hsa-miR-326 | STAG3L5P-PV/RIG2P-PILRB |  |
| hsa-miR-326 | AC069281.2              |  |
| hsa-miR-326 | AC005046.1              |  |
| hsa-miR-326 | POT1-AS1                |  |
| hsa-miR-326 | SND1-IT1                |  |
| hsa-miR-326 | LINC-PINT               |  |
| hsa-miR-326 | AC010973.2              |  |
| hsa-miR-326 | LINC01287               |  |
| hsa-miR-326 | AC006372.3              |  |
| hsa-miR-326 | AF131215.5              |  |
| hsa-miR-326 | AC015468.4              |  |
| hsa-miR-326 | AC055854.1              |  |
| hsa-miR-326 | AC104958.2              |  |
| hsa-miR-326 | PCAT1                   |  |
| hsa-miR-326 | PVT1                    |  |
| hsa-miR-326 | PEG13                   |  |
| hsa-miR-326 | LY6E-DT                 |  |
| hsa-miR-326 | VLDLR-AS1               |  |
| hsa-miR-326 | LINC01242               |  |
| hsa-miR-326 | AL353795.3              |  |
| hsa-miR-326 | AL590705.5              |  |
| hsa-miR-326 | AL138756.1              |  |
| hsa-miR-326 | GSN-AS1                 |  |
| hsa-miR-326 | MIR600HG                |  |
| hsa-miR-326 | AL162724.1              |  |
| hsa-miR-326 | C9orf106                |  |
| hsa-miR-326 | LINC01503               |  |
| hsa-miR-326 | LINC00963               |  |
| hsa-miR-326 | BX649632.1              |  |
| hsa-miR-326 | AL138781.1              |  |
| hsa-miR-326 | SNHG7                   |  |
| hsa-miR-326 | CCDC183-AS1             |  |
| hsa-miR-326 | AL355987.4              |  |
| hsa-miR-326 | STPG3-AS1               |  |
| hsa-miR-326 | ARRDC1-AS1              |  |
| hsa-miR-326 | AL137145.1              |  |

|             |            |  |
|-------------|------------|--|
| hsa-miR-326 | AL157392.3 |  |
| hsa-miR-326 | ZEB1-AS1   |  |
| hsa-miR-326 | TMEM72-AS1 |  |
| hsa-miR-326 | AL513534.1 |  |
| hsa-miR-326 | AC022400.7 |  |
| hsa-miR-326 | LINC00857  |  |
| hsa-miR-326 | AL365434.1 |  |
| hsa-miR-326 | ENTPD1-AS1 |  |
| hsa-miR-326 | RPARP-AS1  |  |
| hsa-miR-326 | AL158212.3 |  |
| hsa-miR-326 | AL390763.2 |  |
| hsa-miR-326 | AC069287.2 |  |
| hsa-miR-326 | AP006284.1 |  |
| hsa-miR-326 | H19        |  |
| hsa-miR-326 | AC124057.1 |  |
| hsa-miR-326 | KCNQ1OT1   |  |
| hsa-miR-326 | BDNF-AS    |  |
| hsa-miR-326 | WT1-AS     |  |
| hsa-miR-326 | AL136146.2 |  |
| hsa-miR-326 | AC129502.1 |  |
| hsa-miR-326 | AC116021.1 |  |
| hsa-miR-326 | SNHG1      |  |
| hsa-miR-326 | NEAT1      |  |
| hsa-miR-326 | MALAT1     |  |
| hsa-miR-326 | AP000879.2 |  |
| hsa-miR-326 | AP002336.1 |  |
| hsa-miR-326 | LINC01537  |  |
| hsa-miR-326 | AP001972.5 |  |
| hsa-miR-326 | AP001922.6 |  |
| hsa-miR-326 | COLCA1     |  |
| hsa-miR-326 | AP000757.1 |  |
| hsa-miR-326 | AP003486.1 |  |
| hsa-miR-326 | C1RL-AS1   |  |
| hsa-miR-326 | FAM66C     |  |
| hsa-miR-326 | AC010186.3 |  |
| hsa-miR-326 | LINC00941  |  |
| hsa-miR-326 | AC025259.1 |  |
| hsa-miR-326 | AC068888.1 |  |
| hsa-miR-326 | HOTAIR     |  |
| hsa-miR-326 | HOXC-AS3   |  |
| hsa-miR-326 | SMUG1-AS1  |  |
| hsa-miR-326 | AC023794.7 |  |
| hsa-miR-326 | AC025165.1 |  |
| hsa-miR-326 | AC084033.3 |  |
| hsa-miR-326 | AC090502.1 |  |
| hsa-miR-326 | LINC02407  |  |
| hsa-miR-326 | HELLPAR    |  |
| hsa-miR-326 | AC007637.1 |  |
| hsa-miR-326 | AC144548.1 |  |
| hsa-miR-326 | NRAV       |  |
| hsa-miR-326 | AC026362.1 |  |
| hsa-miR-326 | AC026362.2 |  |
| hsa-miR-326 | AC055713.1 |  |
| hsa-miR-326 | AC068790.9 |  |
| hsa-miR-326 | AC122688.3 |  |
| hsa-miR-326 | FZD10-AS1  |  |
| hsa-miR-326 | AC131212.3 |  |
| hsa-miR-326 | AC131212.2 |  |
| hsa-miR-326 | PCOTH      |  |
| hsa-miR-326 | LINC00412  |  |
| hsa-miR-326 | AL161891.1 |  |
| hsa-miR-326 | DLEU2      |  |
| hsa-miR-326 | GAS6-AS1   |  |
| hsa-miR-326 | AL355075.4 |  |
| hsa-miR-326 | AL132780.2 |  |
| hsa-miR-326 | AL132780.4 |  |
| hsa-miR-326 | ZFHX2-AS1  |  |
| hsa-miR-326 | AL135999.1 |  |
| hsa-miR-326 | DHRS4-AS1  |  |
| hsa-miR-326 | AL096870.2 |  |
| hsa-miR-326 | AL133372.2 |  |
| hsa-miR-326 | G2E3-AS1   |  |
| hsa-miR-326 | LINC02313  |  |



|             |               |  |
|-------------|---------------|--|
| hsa-miR-326 | AL158801.2    |  |
| hsa-miR-326 | LINC01303     |  |
| hsa-miR-326 | FUT8-AS1      |  |
| hsa-miR-326 | LINC01220     |  |
| hsa-miR-326 | VASH1-AS1     |  |
| hsa-miR-326 | AL355838.1    |  |
| hsa-miR-326 | AL162171.3    |  |
| hsa-miR-326 | AL137786.1    |  |
| hsa-miR-326 | AL049833.3    |  |
| hsa-miR-326 | MEG3          |  |
| hsa-miR-326 | DIO3OS        |  |
| hsa-miR-326 | AL583722.2    |  |
| hsa-miR-326 | SNHG14        |  |
| hsa-miR-326 | AC124312.3    |  |
| hsa-miR-326 | AC127502.2    |  |
| hsa-miR-326 | AC013652.1    |  |
| hsa-miR-326 | OIP5-AS1      |  |
| hsa-miR-326 | GABPB1-AS1    |  |
| hsa-miR-326 | AC020891.2    |  |
| hsa-miR-326 | AC011912.1    |  |
| hsa-miR-326 | AC010999.3    |  |
| hsa-miR-326 | AC018904.2    |  |
| hsa-miR-326 | AC007950.2    |  |
| hsa-miR-326 | AC110048.2    |  |
| hsa-miR-326 | AC026992.2    |  |
| hsa-miR-326 | AC009690.2    |  |
| hsa-miR-326 | TMEM202-AS1   |  |
| hsa-miR-326 | AC100827.4    |  |
| hsa-miR-326 | NPTN-IT1      |  |
| hsa-miR-326 | DNM1P35       |  |
| hsa-miR-326 | TMC3-AS1      |  |
| hsa-miR-326 | MIR9-3HG      |  |
| hsa-miR-326 | ZNF710-AS1    |  |
| hsa-miR-326 | NR2F2-AS1     |  |
| hsa-miR-326 | AC036108.2    |  |
| hsa-miR-326 | SNHG9         |  |
| hsa-miR-326 | AC106820.4    |  |
| hsa-miR-326 | AC093525.10   |  |
| hsa-miR-326 | AC141586.4    |  |
| hsa-miR-326 | AC092117.1    |  |
| hsa-miR-326 | MMP25-AS1     |  |
| hsa-miR-326 | AC022167.2    |  |
| hsa-miR-326 | AC009133.1    |  |
| hsa-miR-326 | SLX1A-SULT1A3 |  |
| hsa-miR-326 | AC106782.6    |  |
| hsa-miR-326 | AC026471.1    |  |
| hsa-miR-326 | AC026471.6    |  |
| hsa-miR-326 | AC009061.2    |  |
| hsa-miR-326 | AC040162.3    |  |
| hsa-miR-326 | AC020978.1    |  |
| hsa-miR-326 | AC126773.2    |  |
| hsa-miR-326 | AC009022.1    |  |
| hsa-miR-326 | AC020763.4    |  |
| hsa-miR-326 | AC009078.3    |  |
| hsa-miR-326 | AC136603.1    |  |
| hsa-miR-326 | AC092135.3    |  |
| hsa-miR-326 | AC092127.1    |  |
| hsa-miR-326 | AC105429.1    |  |
| hsa-miR-326 | SNAI3-AS1     |  |
| hsa-miR-326 | AC092384.3    |  |
| hsa-miR-326 | AC099684.2    |  |
| hsa-miR-326 | AC005696.4    |  |
| hsa-miR-326 | AC004771.2    |  |
| hsa-miR-326 | AC113189.2    |  |
| hsa-miR-326 | AC113189.4    |  |
| hsa-miR-326 | AC016876.2    |  |
| hsa-miR-326 | AC005224.4    |  |
| hsa-miR-326 | LRR75A-AS1    |  |
| hsa-miR-326 | AC055811.4    |  |
| hsa-miR-326 | AC087163.3    |  |
| hsa-miR-326 | AC026271.3    |  |
| hsa-miR-326 | CCDC144NL-AS1 |  |
| hsa-miR-326 | AC233702.9    |  |

|             |                           |  |
|-------------|---------------------------|--|
| hsa-miR-326 | AC002094.1                |  |
| hsa-miR-326 | AC010761.1                |  |
| hsa-miR-326 | AC011840.6                |  |
| hsa-miR-326 | AC018629.1                |  |
| hsa-miR-326 | AC125257.1                |  |
| hsa-miR-326 | AC099811.1                |  |
| hsa-miR-326 | AC067852.2                |  |
| hsa-miR-326 | AC060780.1                |  |
| hsa-miR-326 | AC003102.1                |  |
| hsa-miR-326 | AC142472.1                |  |
| hsa-miR-326 | AC008105.3                |  |
| hsa-miR-326 | AC018521.1                |  |
| hsa-miR-326 | LINC02086                 |  |
| hsa-miR-326 | AC015909.5                |  |
| hsa-miR-326 | AC005921.3                |  |
| hsa-miR-326 | TOB1-AS1                  |  |
| hsa-miR-326 | AC004584.3                |  |
| hsa-miR-326 | AC091181.1                |  |
| hsa-miR-326 | AC015883.1                |  |
| hsa-miR-326 | AC007431.3                |  |
| hsa-miR-326 | AC015813.1                |  |
| hsa-miR-326 | ARHGAP27P1-BPTFP1-KPNA2P3 |  |
| hsa-miR-326 | AC005332.6                |  |
| hsa-miR-326 | LINC01482                 |  |
| hsa-miR-326 | AC016888.1                |  |
| hsa-miR-326 | AC022211.2                |  |
| hsa-miR-326 | TEN1-CDK3                 |  |
| hsa-miR-326 | SNHG16                    |  |
| hsa-miR-326 | SNHG20                    |  |
| hsa-miR-326 | AC100788.2                |  |
| hsa-miR-326 | AC087741.1                |  |
| hsa-miR-326 | AC124319.2                |  |
| hsa-miR-326 | AC120024.4                |  |
| hsa-miR-326 | LINC00482                 |  |
| hsa-miR-326 | AC110285.6                |  |
| hsa-miR-326 | AC139149.1                |  |
| hsa-miR-326 | AC132872.3                |  |
| hsa-miR-326 | HEXDC-IT1                 |  |
| hsa-miR-326 | AC124283.5                |  |
| hsa-miR-326 | LINC00667                 |  |
| hsa-miR-326 | NDUFV2-AS1                |  |
| hsa-miR-326 | AP001269.4                |  |
| hsa-miR-326 | AP005131.6                |  |
| hsa-miR-326 | AC090220.1                |  |
| hsa-miR-326 | AC022031.2                |  |
| hsa-miR-326 | AC105105.2                |  |
| hsa-miR-326 | AC009716.2                |  |
| hsa-miR-326 | AC093330.1                |  |
| hsa-miR-326 | AC093330.2                |  |
| hsa-miR-326 | AC134978.1                |  |
| hsa-miR-326 | AC009005.1                |  |
| hsa-miR-326 | AC005329.3                |  |
| hsa-miR-326 | AC027307.2                |  |
| hsa-miR-326 | CACTIN-AS1                |  |
| hsa-miR-326 | AC011498.7                |  |
| hsa-miR-326 | AC011491.2                |  |
| hsa-miR-326 | AC010336.1                |  |
| hsa-miR-326 | AC010336.4                |  |
| hsa-miR-326 | AC020917.2                |  |
| hsa-miR-326 | AC008764.10               |  |
| hsa-miR-326 | AC024075.2                |  |
| hsa-miR-326 | AC138430.1                |  |
| hsa-miR-326 | LINC00663                 |  |
| hsa-miR-326 | AC092329.4                |  |
| hsa-miR-326 | AC007786.3                |  |
| hsa-miR-326 | LINC01834                 |  |
| hsa-miR-326 | AC008738.7                |  |
| hsa-miR-326 | CEBPA-AS1                 |  |
| hsa-miR-326 | TMEM147-AS1               |  |
| hsa-miR-326 | AC002116.1                |  |
| hsa-miR-326 | LINC00665                 |  |
| hsa-miR-326 | AC022144.1                |  |
| hsa-miR-326 | AC118344.2                |  |

|              |            |  |
|--------------|------------|--|
| hsa-miR-326  | LIPE-AS1   |  |
| hsa-miR-326  | AC243964.3 |  |
| hsa-miR-326  | AC008895.1 |  |
| hsa-miR-326  | AC022150.4 |  |
| hsa-miR-326  | AC010327.3 |  |
| hsa-miR-326  | AC010327.4 |  |
| hsa-miR-326  | AC010327.5 |  |
| hsa-miR-326  | ZNF460-AS1 |  |
| hsa-miR-326  | MZF1-AS1   |  |
| hsa-miR-326  | AL117335.1 |  |
| hsa-miR-326  | AL121761.2 |  |
| hsa-miR-326  | LINC00261  |  |
| hsa-miR-326  | ZNF337-AS1 |  |
| hsa-miR-326  | AL391095.1 |  |
| hsa-miR-326  | LINC01270  |  |
| hsa-miR-326  | AL121832.3 |  |
| hsa-miR-326  | AL121829.2 |  |
| hsa-miR-326  | LINC01666  |  |
| hsa-miR-326  | CR381653.1 |  |
| hsa-miR-326  | MIR548XHGG |  |
| hsa-miR-326  | LINC00649  |  |
| hsa-miR-326  | BACE2-IT1  |  |
| hsa-miR-326  | PLAC4      |  |
| hsa-miR-326  | LINC01671  |  |
| hsa-miR-326  | LINC00313  |  |
| hsa-miR-326  | LINC01669  |  |
| hsa-miR-326  | AP001062.1 |  |
| hsa-miR-326  | TRPM2-AS   |  |
| hsa-miR-326  | TSPEAR-AS2 |  |
| hsa-miR-326  | AP001471.1 |  |
| hsa-miR-326  | MCM3AP-AS1 |  |
| hsa-miR-326  | CECR3      |  |
| hsa-miR-326  | DGCR11     |  |
| hsa-miR-326  | AC004471.1 |  |
| hsa-miR-326  | AC002470.2 |  |
| hsa-miR-326  | THAP7-AS1  |  |
| hsa-miR-326  | AP000346.1 |  |
| hsa-miR-326  | GUSBP11    |  |
| hsa-miR-326  | AP000350.6 |  |
| hsa-miR-326  | AL008721.2 |  |
| hsa-miR-326  | Z99774.1   |  |
| hsa-miR-326  | MIAT       |  |
| hsa-miR-326  | TTC28-AS1  |  |
| hsa-miR-326  | TUG1       |  |
| hsa-miR-326  | Z94160.1   |  |
| hsa-miR-326  | AL022311.1 |  |
| hsa-miR-326  | AL021707.6 |  |
| hsa-miR-326  | Z83851.1   |  |
| hsa-miR-326  | AL022476.1 |  |
| hsa-miR-326  | AL031595.3 |  |
| hsa-miR-326  | BX324167.2 |  |
| hsa-miR-326  | AL121672.3 |  |
| hsa-miR-326  | PRR34-AS1  |  |
| hsa-miR-326  | MIRLET7BHG |  |
| hsa-miR-326  | FP325330.3 |  |
| hsa-miR-326  | Z97192.3   |  |
| hsa-miR-326  | BX539320.1 |  |
| hsa-miR-326  | AL022328.4 |  |
| hsa-miR-326  | AC004656.1 |  |
| hsa-miR-326  | AC231533.1 |  |
| hsa-miR-326  | AC232271.1 |  |
| hsa-miR-326  | XIST       |  |
| hsa-miR-326  | AC234782.2 |  |
| hsa-miR-326  | DANT2      |  |
| hsa-miR-326  | LINC00632  |  |
| hsa-miR-326  | LINC00894  |  |
| hsa-miR-326  | ASMTL-AS1  |  |
| hsa-miR-326  | AC011297.1 |  |
| hsa-miR-3666 | AL645608.1 |  |
| hsa-miR-3666 | AL391244.3 |  |
| hsa-miR-3666 | AL603962.1 |  |
| hsa-miR-3666 | PINK1-AS   |  |
| hsa-miR-3666 | AL513327.2 |  |

|              |              |  |
|--------------|--------------|--|
| hsa-miR-3666 | AL603839.3   |  |
| hsa-miR-3666 | AL139289.2   |  |
| hsa-miR-3666 | AC096536.1   |  |
| hsa-miR-3666 | LINC01748    |  |
| hsa-miR-3666 | LINC01359    |  |
| hsa-miR-3666 | CCDC18-AS1   |  |
| hsa-miR-3666 | SLC16A1-AS1  |  |
| hsa-miR-3666 | HIPK1-AS1    |  |
| hsa-miR-3666 | AL390066.1   |  |
| hsa-miR-3666 | AC244021.1   |  |
| hsa-miR-3666 | AC239809.3   |  |
| hsa-miR-3666 | AC242426.2   |  |
| hsa-miR-3666 | AC242426.3   |  |
| hsa-miR-3666 | AC234582.1   |  |
| hsa-miR-3666 | ASH1L-IT1    |  |
| hsa-miR-3666 | KIRREL1-IT1  |  |
| hsa-miR-3666 | DNM3OS       |  |
| hsa-miR-3666 | MIR29B2CHG   |  |
| hsa-miR-3666 | AL645465.1   |  |
| hsa-miR-3666 | AC104794.2   |  |
| hsa-miR-3666 | AC130710.1   |  |
| hsa-miR-3666 | AC115619.1   |  |
| hsa-miR-3666 | AL133243.2   |  |
| hsa-miR-3666 | AC008280.3   |  |
| hsa-miR-3666 | AC007744.1   |  |
| hsa-miR-3666 | PCBP1-AS1    |  |
| hsa-miR-3666 | BOLA3-AS1    |  |
| hsa-miR-3666 | AC005034.5   |  |
| hsa-miR-3666 | AC159540.1   |  |
| hsa-miR-3666 | PAX8-AS1     |  |
| hsa-miR-3666 | AC016710.1   |  |
| hsa-miR-3666 | AC009951.1   |  |
| hsa-miR-3666 | LINC01876    |  |
| hsa-miR-3666 | HAGLR        |  |
| hsa-miR-3666 | AC009962.1   |  |
| hsa-miR-3666 | LINC01790    |  |
| hsa-miR-3666 | AC064836.3   |  |
| hsa-miR-3666 | AC007038.1   |  |
| hsa-miR-3666 | AC021016.2   |  |
| hsa-miR-3666 | AC016717.2   |  |
| hsa-miR-3666 | LINC01266    |  |
| hsa-miR-3666 | THUMPD3-AS1  |  |
| hsa-miR-3666 | LINC00852    |  |
| hsa-miR-3666 | FGD5-AS1     |  |
| hsa-miR-3666 | AC090948.2   |  |
| hsa-miR-3666 | AC104447.1   |  |
| hsa-miR-3666 | AC012467.2   |  |
| hsa-miR-3666 | AC109587.1   |  |
| hsa-miR-3666 | LINC02035    |  |
| hsa-miR-3666 | AC022336.3   |  |
| hsa-miR-3666 | AC092902.2   |  |
| hsa-miR-3666 | AC010210.1   |  |
| hsa-miR-3666 | AC097103.2   |  |
| hsa-miR-3666 | SOX2-OT      |  |
| hsa-miR-3666 | LPP-AS2      |  |
| hsa-miR-3666 | AC124944.1   |  |
| hsa-miR-3666 | LINC02473    |  |
| hsa-miR-3666 | LINC02484    |  |
| hsa-miR-3666 | AC116049.2   |  |
| hsa-miR-3666 | AC096721.1   |  |
| hsa-miR-3666 | AC124016.2   |  |
| hsa-miR-3666 | AC097376.2   |  |
| hsa-miR-3666 | AC104083.1   |  |
| hsa-miR-3666 | AC078881.1   |  |
| hsa-miR-3666 | AC099343.3   |  |
| hsa-miR-3666 | NNT-AS1      |  |
| hsa-miR-3666 | AC022107.1   |  |
| hsa-miR-3666 | AC026427.1   |  |
| hsa-miR-3666 | CKMT2-AS1    |  |
| hsa-miR-3666 | TMEM161B-AS1 |  |
| hsa-miR-3666 | AC008608.2   |  |
| hsa-miR-3666 | AC109466.1   |  |
| hsa-miR-3666 | AC008429.1   |  |

|              |               |  |
|--------------|---------------|--|
| hsa-miR-3666 | ZNF346-IT1    |  |
| hsa-miR-3666 | AL590004.4    |  |
| hsa-miR-3666 | AL137003.2    |  |
| hsa-miR-3666 | E2F3-IT1      |  |
| hsa-miR-3666 | HCG18         |  |
| hsa-miR-3666 | AC019205.1    |  |
| hsa-miR-3666 | TARID         |  |
| hsa-miR-3666 | HYMA1         |  |
| hsa-miR-3666 | AL022069.1    |  |
| hsa-miR-3666 | Z94721.2      |  |
| hsa-miR-3666 | HOXA11-AS     |  |
| hsa-miR-3666 | DLX6-AS1      |  |
| hsa-miR-3666 | ST7-AS1       |  |
| hsa-miR-3666 | C8orf49       |  |
| hsa-miR-3666 | AP006248.5    |  |
| hsa-miR-3666 | AC105206.1    |  |
| hsa-miR-3666 | AC107959.2    |  |
| hsa-miR-3666 | RBPMS-AS1     |  |
| hsa-miR-3666 | AC130304.1    |  |
| hsa-miR-3666 | AC011632.1    |  |
| hsa-miR-3666 | AF117829.1    |  |
| hsa-miR-3666 | AC084346.2    |  |
| hsa-miR-3666 | AP003469.4    |  |
| hsa-miR-3666 | BAALC-AS1     |  |
| hsa-miR-3666 | AC079061.1    |  |
| hsa-miR-3666 | PCAT1         |  |
| hsa-miR-3666 | CASC19        |  |
| hsa-miR-3666 | AC107375.1    |  |
| hsa-miR-3666 | AL354707.1    |  |
| hsa-miR-3666 | AL158206.1    |  |
| hsa-miR-3666 | AL158825.2    |  |
| hsa-miR-3666 | AL162586.1    |  |
| hsa-miR-3666 | SLC25A25-AS1  |  |
| hsa-miR-3666 | AL359091.4    |  |
| hsa-miR-3666 | LINC01503     |  |
| hsa-miR-3666 | LINC00963     |  |
| hsa-miR-3666 | PRKCC-AS1     |  |
| hsa-miR-3666 | AL390318.1    |  |
| hsa-miR-3666 | LINC00839     |  |
| hsa-miR-3666 | RP11-592B15.3 |  |
| hsa-miR-3666 | NUTM2B-AS1    |  |
| hsa-miR-3666 | AL359195.2    |  |
| hsa-miR-3666 | AC067750.1    |  |
| hsa-miR-3666 | RPARP-AS1     |  |
| hsa-miR-3666 | AC069287.2    |  |
| hsa-miR-3666 | AP006621.5    |  |
| hsa-miR-3666 | H19           |  |
| hsa-miR-3666 | KCNQ1OT1      |  |
| hsa-miR-3666 | LINC00958     |  |
| hsa-miR-3666 | AC068860.1    |  |
| hsa-miR-3666 | LINC00294     |  |
| hsa-miR-3666 | AP000437.1    |  |
| hsa-miR-3666 | AP001453.1    |  |
| hsa-miR-3666 | AP003068.4    |  |
| hsa-miR-3666 | NEAT1         |  |
| hsa-miR-3666 | AP002807.1    |  |
| hsa-miR-3666 | AP000808.1    |  |
| hsa-miR-3666 | AP000560.1    |  |
| hsa-miR-3666 | KCTD21-AS1    |  |
| hsa-miR-3666 | AP002840.2    |  |
| hsa-miR-3666 | MIR100HG      |  |
| hsa-miR-3666 | AP003486.1    |  |
| hsa-miR-3666 | AC021054.1    |  |
| hsa-miR-3666 | AC006206.2    |  |
| hsa-miR-3666 | AC010186.4    |  |
| hsa-miR-3666 | AC092821.3    |  |
| hsa-miR-3666 | AC092828.1    |  |
| hsa-miR-3666 | AC048344.4    |  |
| hsa-miR-3666 | AC026356.2    |  |
| hsa-miR-3666 | AC048341.2    |  |
| hsa-miR-3666 | AC020656.2    |  |
| hsa-miR-3666 | RMST          |  |
| hsa-miR-3666 | HELLPAR       |  |

|              |               |  |
|--------------|---------------|--|
| hsa-miR-3666 | AC079174.2    |  |
| hsa-miR-3666 | LINC01486     |  |
| hsa-miR-3666 | LINC00173     |  |
| hsa-miR-3666 | AC004812.2    |  |
| hsa-miR-3666 | LINC01089     |  |
| hsa-miR-3666 | AC073857.1    |  |
| hsa-miR-3666 | AC108704.2    |  |
| hsa-miR-3666 | AC073578.3    |  |
| hsa-miR-3666 | AC131009.4    |  |
| hsa-miR-3666 | AC131212.3    |  |
| hsa-miR-3666 | FRY-AS1       |  |
| hsa-miR-3666 | AL138820.1    |  |
| hsa-miR-3666 | TUSC8         |  |
| hsa-miR-3666 | TPT1-AS1      |  |
| hsa-miR-3666 | MIR17HG       |  |
| hsa-miR-3666 | LINC01232     |  |
| hsa-miR-3666 | AL355338.1    |  |
| hsa-miR-3666 | RP11-397O8.7  |  |
| hsa-miR-3666 | LINC00346     |  |
| hsa-miR-3666 | DHRS4-AS1     |  |
| hsa-miR-3666 | AL391152.1    |  |
| hsa-miR-3666 | AC004817.3    |  |
| hsa-miR-3666 | AC005519.1    |  |
| hsa-miR-3666 | VASH1-AS1     |  |
| hsa-miR-3666 | AL121768.1    |  |
| hsa-miR-3666 | AL163051.2    |  |
| hsa-miR-3666 | MEG8          |  |
| hsa-miR-3666 | AL049840.4    |  |
| hsa-miR-3666 | PWAR6         |  |
| hsa-miR-3666 | SNHG14        |  |
| hsa-miR-3666 | AC127502.2    |  |
| hsa-miR-3666 | AC025678.3    |  |
| hsa-miR-3666 | AC020658.3    |  |
| hsa-miR-3666 | AC087721.1    |  |
| hsa-miR-3666 | AC018362.1    |  |
| hsa-miR-3666 | GABPB1-AS1    |  |
| hsa-miR-3666 | AC066613.1    |  |
| hsa-miR-3666 | AC025271.4    |  |
| hsa-miR-3666 | AC105036.3    |  |
| hsa-miR-3666 | AC019294.2    |  |
| hsa-miR-3666 | AC068870.1    |  |
| hsa-miR-3666 | AC068870.3    |  |
| hsa-miR-3666 | AC013391.2    |  |
| hsa-miR-3666 | NR2F2-AS1     |  |
| hsa-miR-3666 | AC118658.2    |  |
| hsa-miR-3666 | AL008727.1    |  |
| hsa-miR-3666 | AL031710.2    |  |
| hsa-miR-3666 | AC106820.4    |  |
| hsa-miR-3666 | LINC01569     |  |
| hsa-miR-3666 | AC005632.2    |  |
| hsa-miR-3666 | AC092338.2    |  |
| hsa-miR-3666 | AC135048.1    |  |
| hsa-miR-3666 | AC135050.6    |  |
| hsa-miR-3666 | AC040160.2    |  |
| hsa-miR-3666 | AC004943.2    |  |
| hsa-miR-3666 | AC092718.2    |  |
| hsa-miR-3666 | AC092139.1    |  |
| hsa-miR-3666 | AC105429.1    |  |
| hsa-miR-3666 | AC015799.1    |  |
| hsa-miR-3666 | AC005224.3    |  |
| hsa-miR-3666 | LRRRC75A-AS1  |  |
| hsa-miR-3666 | LINC02076     |  |
| hsa-miR-3666 | AC107983.2    |  |
| hsa-miR-3666 | CCDC144NL-AS1 |  |
| hsa-miR-3666 | AC005288.1    |  |
| hsa-miR-3666 | AC008105.3    |  |
| hsa-miR-3666 | AC091133.1    |  |
| hsa-miR-3666 | AC005921.3    |  |
| hsa-miR-3666 | AC005839.1    |  |
| hsa-miR-3666 | AC015813.6    |  |
| hsa-miR-3666 | AC120024.4    |  |
| hsa-miR-3666 | BAIAP2-AS1    |  |
| hsa-miR-3666 | AC124283.3    |  |

|              |                 |  |
|--------------|-----------------|--|
| hsa-miR-3666 | LINC00667       |  |
| hsa-miR-3666 | LINC01887       |  |
| hsa-miR-3666 | AP001029.2      |  |
| hsa-miR-3666 | AC007996.1      |  |
| hsa-miR-3666 | AC100847.1      |  |
| hsa-miR-3666 | AC105105.2      |  |
| hsa-miR-3666 | AC105105.1      |  |
| hsa-miR-3666 | AC023301.1      |  |
| hsa-miR-3666 | AC009716.2      |  |
| hsa-miR-3666 | AC114341.1      |  |
| hsa-miR-3666 | AC006538.1      |  |
| hsa-miR-3666 | AC011461.1      |  |
| hsa-miR-3666 | ILF3-AS1        |  |
| hsa-miR-3666 | AC008543.3      |  |
| hsa-miR-3666 | BISPR           |  |
| hsa-miR-3666 | LINC00663       |  |
| hsa-miR-3666 | AC011503.2      |  |
| hsa-miR-3666 | LINC00662       |  |
| hsa-miR-3666 | AC007786.3      |  |
| hsa-miR-3666 | AC021092.1      |  |
| hsa-miR-3666 | AC010325.2      |  |
| hsa-miR-3666 | AC012313.3      |  |
| hsa-miR-3666 | AL117335.1      |  |
| hsa-miR-3666 | LINC00261       |  |
| hsa-miR-3666 | AL121827.2      |  |
| hsa-miR-3666 | UCKL1-AS1       |  |
| hsa-miR-3666 | AF127936.2      |  |
| hsa-miR-3666 | BACH1-IT2       |  |
| hsa-miR-3666 | LINC02575       |  |
| hsa-miR-3666 | MCM3AP-AS1      |  |
| hsa-miR-3666 | AP001469.3      |  |
| hsa-miR-3666 | AC016027.2      |  |
| hsa-miR-3666 | MIAT            |  |
| hsa-miR-3666 | AC005005.4      |  |
| hsa-miR-3666 | LINC01521       |  |
| hsa-miR-3666 | Z95331.1        |  |
| hsa-miR-3666 | AL021392.1      |  |
| hsa-miR-3666 | FP325330.3      |  |
| hsa-miR-3666 | PINCR           |  |
| hsa-miR-3666 | LINC01278       |  |
| hsa-miR-3666 | XIST            |  |
| hsa-miR-3666 | AL359740.1      |  |
| hsa-miR-3666 | Z83843.1        |  |
| hsa-miR-3666 | AL035425.4      |  |
| hsa-miR-3666 | AL683813.1      |  |
| hsa-miR-3666 | AC245140.1      |  |
| hsa-miR-422a | LINC01128       |  |
| hsa-miR-422a | AL645608.3      |  |
| hsa-miR-422a | AL645608.1      |  |
| hsa-miR-422a | AL391244.1      |  |
| hsa-miR-422a | AL590438.1      |  |
| hsa-miR-422a | MIR34AHG        |  |
| hsa-miR-422a | AC254633.1      |  |
| hsa-miR-422a | AL451042.2      |  |
| hsa-miR-422a | LINC01772       |  |
| hsa-miR-422a | PINK1-AS        |  |
| hsa-miR-422a | AL049795.2      |  |
| hsa-miR-422a | AL662907.2      |  |
| hsa-miR-422a | NFYC-AS1        |  |
| hsa-miR-422a | AL512353.1      |  |
| hsa-miR-422a | SZT2-AS1        |  |
| hsa-miR-422a | KDM4A-AS1       |  |
| hsa-miR-422a | LINC01358       |  |
| hsa-miR-422a | LINC01748       |  |
| hsa-miR-422a | RP4-565E6.1     |  |
| hsa-miR-422a | XXyac-YX155B6.6 |  |
| hsa-miR-422a | AC234582.1      |  |
| hsa-miR-422a | RUSC1-AS1       |  |
| hsa-miR-422a | KIRREL1-IT1     |  |
| hsa-miR-422a | LINC01133       |  |
| hsa-miR-422a | AL592435.1      |  |
| hsa-miR-422a | DNM3OS          |  |
| hsa-miR-422a | MIR29B2CHG      |  |

|              |                        |  |
|--------------|------------------------|--|
| hsa-miR-422a | AKT3-IT1               |  |
| hsa-miR-422a | C2orf48                |  |
| hsa-miR-422a | RN7SL832P              |  |
| hsa-miR-422a | LINC01126              |  |
| hsa-miR-422a | AC093110.1             |  |
| hsa-miR-422a | LINC02245              |  |
| hsa-miR-422a | AC005041.3             |  |
| hsa-miR-422a | AC012360.3             |  |
| hsa-miR-422a | MIR4435-2HG            |  |
| hsa-miR-422a | PAX8-AS1               |  |
| hsa-miR-422a | AC110769.1             |  |
| hsa-miR-422a | AC073050.1             |  |
| hsa-miR-422a | AC016723.1             |  |
| hsa-miR-422a | AC009948.5             |  |
| hsa-miR-422a | AC016708.1             |  |
| hsa-miR-422a | THUMPD3-AS1            |  |
| hsa-miR-422a | AC090948.2             |  |
| hsa-miR-422a | ITGA9-AS1              |  |
| hsa-miR-422a | AC104447.1             |  |
| hsa-miR-422a | RASSF1-AS1             |  |
| hsa-miR-422a | ADAMTS9-AS2            |  |
| hsa-miR-422a | DUBR                   |  |
| hsa-miR-422a | LINC01205              |  |
| hsa-miR-422a | AC112503.2             |  |
| hsa-miR-422a | AC022336.3             |  |
| hsa-miR-422a | MBNL1-AS1              |  |
| hsa-miR-422a | AC073288.1             |  |
| hsa-miR-422a | YEATS2-AS1             |  |
| hsa-miR-422a | MELTF-AS1              |  |
| hsa-miR-422a | AC139887.2             |  |
| hsa-miR-422a | CTBP1-AS2              |  |
| hsa-miR-422a | AC097382.2             |  |
| hsa-miR-422a | AC007370.2             |  |
| hsa-miR-422a | AC107068.1             |  |
| hsa-miR-422a | UBA6-AS1               |  |
| hsa-miR-422a | AC105285.1             |  |
| hsa-miR-422a | AC010442.1             |  |
| hsa-miR-422a | AC010491.1             |  |
| hsa-miR-422a | BASP1-AS1              |  |
| hsa-miR-422a | STARD4-AS1             |  |
| hsa-miR-422a | AC116366.1             |  |
| hsa-miR-422a | TRIM52-AS1             |  |
| hsa-miR-422a | AL355336.1             |  |
| hsa-miR-422a | Z97832.2               |  |
| hsa-miR-422a | AL035587.1             |  |
| hsa-miR-422a | LINC00472              |  |
| hsa-miR-422a | AC019205.1             |  |
| hsa-miR-422a | AL596202.1             |  |
| hsa-miR-422a | AL354892.3             |  |
| hsa-miR-422a | AC147651.1             |  |
| hsa-miR-422a | PSMG3-AS1              |  |
| hsa-miR-422a | AC004691.1             |  |
| hsa-miR-422a | POLR2J4                |  |
| hsa-miR-422a | EGFR-AS1               |  |
| hsa-miR-422a | AC118758.3             |  |
| hsa-miR-422a | AC073188.5             |  |
| hsa-miR-422a | LINC00174              |  |
| hsa-miR-422a | AC027644.3             |  |
| hsa-miR-422a | DTX2P1-UPK3BP1-PMS2P11 |  |
| hsa-miR-422a | MAGI2-AS3              |  |
| hsa-miR-422a | AC002076.1             |  |
| hsa-miR-422a | STAG3L5P-PVRIG2P-PILRB |  |
| hsa-miR-422a | AC092849.1             |  |
| hsa-miR-422a | AC000123.3             |  |
| hsa-miR-422a | AC016831.1             |  |
| hsa-miR-422a | AC008264.2             |  |
| hsa-miR-422a | JHDM1D-AS1             |  |
| hsa-miR-422a | PAXIP1-AS1             |  |
| hsa-miR-422a | AC107959.2             |  |
| hsa-miR-422a | AF106564.1             |  |
| hsa-miR-422a | AC124067.4             |  |
| hsa-miR-422a | MSC-AS1                |  |
| hsa-miR-422a | AF117829.1             |  |



|              |               |  |
|--------------|---------------|--|
| hsa-miR-422a | AZIN1-AS1     |  |
| hsa-miR-422a | PRNCR1        |  |
| hsa-miR-422a | AC105235.1    |  |
| hsa-miR-422a | EBLN3P        |  |
| hsa-miR-422a | AL158071.4    |  |
| hsa-miR-422a | AL589843.1    |  |
| hsa-miR-422a | AL512590.3    |  |
| hsa-miR-422a | AL358074.1    |  |
| hsa-miR-422a | LINC00963     |  |
| hsa-miR-422a | PPP1R26-AS1   |  |
| hsa-miR-422a | AL355987.4    |  |
| hsa-miR-422a | ARRDC1-AS1    |  |
| hsa-miR-422a | AL359878.1    |  |
| hsa-miR-422a | AL139125.2    |  |
| hsa-miR-422a | AL157392.3    |  |
| hsa-miR-422a | RP11-292F22.7 |  |
| hsa-miR-422a | AC069547.1    |  |
| hsa-miR-422a | AC016822.1    |  |
| hsa-miR-422a | AL132656.3    |  |
| hsa-miR-422a | AC067750.1    |  |
| hsa-miR-422a | ACTA2-AS1     |  |
| hsa-miR-422a | OLMALINC      |  |
| hsa-miR-422a | AC025947.1    |  |
| hsa-miR-422a | AP006621.4    |  |
| hsa-miR-422a | KCNQ1OT1      |  |
| hsa-miR-422a | LINC02547     |  |
| hsa-miR-422a | LINC00958     |  |
| hsa-miR-422a | AC090833.1    |  |
| hsa-miR-422a | AP003733.4    |  |
| hsa-miR-422a | NEAT1         |  |
| hsa-miR-422a | MALAT1        |  |
| hsa-miR-422a | AP003419.2    |  |
| hsa-miR-422a | AP000590.1    |  |
| hsa-miR-422a | AP001972.5    |  |
| hsa-miR-422a | AP002840.2    |  |
| hsa-miR-422a | BACE1-AS      |  |
| hsa-miR-422a | AP003392.5    |  |
| hsa-miR-422a | MIR100HG      |  |
| hsa-miR-422a | LINC00987     |  |
| hsa-miR-422a | RASSF8-AS1    |  |
| hsa-miR-422a | AC008124.1    |  |
| hsa-miR-422a | AC025031.4    |  |
| hsa-miR-422a | AC023509.1    |  |
| hsa-miR-422a | AGAP2-AS1     |  |
| hsa-miR-422a | AC026124.1    |  |
| hsa-miR-422a | AC025423.4    |  |
| hsa-miR-422a | AC010203.2    |  |
| hsa-miR-422a | HELLPAR       |  |
| hsa-miR-422a | NRAV          |  |
| hsa-miR-422a | AC122688.3    |  |
| hsa-miR-422a | AC108704.2    |  |
| hsa-miR-422a | AC131212.3    |  |
| hsa-miR-422a | LINC02344     |  |
| hsa-miR-422a | AL161421.1    |  |
| hsa-miR-422a | AL137782.1    |  |
| hsa-miR-422a | LINC00346     |  |
| hsa-miR-422a | ANKRD10-IT1   |  |
| hsa-miR-422a | LINC00641     |  |
| hsa-miR-422a | LINC02313     |  |
| hsa-miR-422a | AL139099.4    |  |
| hsa-miR-422a | AL139099.1    |  |
| hsa-miR-422a | AL627171.1    |  |
| hsa-miR-422a | PSMA3-AS1     |  |
| hsa-miR-422a | AL133370.1    |  |
| hsa-miR-422a | SNHG10        |  |
| hsa-miR-422a | AL135838.1    |  |
| hsa-miR-422a | SNHG14        |  |
| hsa-miR-422a | AC124312.4    |  |
| hsa-miR-422a | PWAR5         |  |
| hsa-miR-422a | AC025678.3    |  |
| hsa-miR-422a | AC087516.2    |  |
| hsa-miR-422a | AC116158.1    |  |
| hsa-miR-422a | AC013652.2    |  |

|              |             |  |
|--------------|-------------|--|
| hsa-miR-422a | OIP5-AS1    |  |
| hsa-miR-422a | GABPB1-IT1  |  |
| hsa-miR-422a | GABPB1-AS1  |  |
| hsa-miR-422a | LINC00926   |  |
| hsa-miR-422a | TPM1-AS     |  |
| hsa-miR-422a | AC007950.2  |  |
| hsa-miR-422a | AC110048.2  |  |
| hsa-miR-422a | AC090826.1  |  |
| hsa-miR-422a | UBL7-AS1    |  |
| hsa-miR-422a | AC023024.1  |  |
| hsa-miR-422a | Z92544.2    |  |
| hsa-miR-422a | AC009065.4  |  |
| hsa-miR-422a | AC093525.8  |  |
| hsa-miR-422a | AC093525.7  |  |
| hsa-miR-422a | AC092117.2  |  |
| hsa-miR-422a | SRRM2-AS1   |  |
| hsa-miR-422a | AC131649.2  |  |
| hsa-miR-422a | IL21R-AS1   |  |
| hsa-miR-422a | AC138904.1  |  |
| hsa-miR-422a | MIR762HG    |  |
| hsa-miR-422a | FBXL19-AS1  |  |
| hsa-miR-422a | AC135048.1  |  |
| hsa-miR-422a | AC009102.2  |  |
| hsa-miR-422a | AC010542.4  |  |
| hsa-miR-422a | AC027682.6  |  |
| hsa-miR-422a | AC116667.1  |  |
| hsa-miR-422a | AC009078.3  |  |
| hsa-miR-422a | AC092139.3  |  |
| hsa-miR-422a | AC009063.2  |  |
| hsa-miR-422a | ATP2C2-AS1  |  |
| hsa-miR-422a | FENDRR      |  |
| hsa-miR-422a | AC027763.2  |  |
| hsa-miR-422a | MYHAS       |  |
| hsa-miR-422a | SPAG5-AS1   |  |
| hsa-miR-422a | AC068669.1  |  |
| hsa-miR-422a | AC067852.3  |  |
| hsa-miR-422a | AC067852.2  |  |
| hsa-miR-422a | AC060780.1  |  |
| hsa-miR-422a | ASB16-AS1   |  |
| hsa-miR-422a | AC002558.3  |  |
| hsa-miR-422a | AC005920.1  |  |
| hsa-miR-422a | AC007485.2  |  |
| hsa-miR-422a | CTC-462L7.1 |  |
| hsa-miR-422a | AC015813.1  |  |
| hsa-miR-422a | AC079331.1  |  |
| hsa-miR-422a | AC005332.6  |  |
| hsa-miR-422a | TEN1-CDK3   |  |
| hsa-miR-422a | SNHG16      |  |
| hsa-miR-422a | AC111170.2  |  |
| hsa-miR-422a | BAIAP2-AS1  |  |
| hsa-miR-422a | AC110285.1  |  |
| hsa-miR-422a | AC139530.1  |  |
| hsa-miR-422a | AC132872.4  |  |
| hsa-miR-422a | AC132872.1  |  |
| hsa-miR-422a | AC124283.3  |  |
| hsa-miR-422a | TYMSOS      |  |
| hsa-miR-422a | AP005057.1  |  |
| hsa-miR-422a | AP005131.6  |  |
| hsa-miR-422a | AC011815.1  |  |
| hsa-miR-422a | AC007998.3  |  |
| hsa-miR-422a | AC105105.2  |  |
| hsa-miR-422a | AC036176.1  |  |
| hsa-miR-422a | AC093330.2  |  |
| hsa-miR-422a | AC007292.2  |  |
| hsa-miR-422a | AC007292.1  |  |
| hsa-miR-422a | AC008760.1  |  |
| hsa-miR-422a | AC020951.1  |  |
| hsa-miR-422a | BISPR       |  |
| hsa-miR-422a | AC092279.1  |  |
| hsa-miR-422a | LINC00662   |  |
| hsa-miR-422a | AC006504.5  |  |
| hsa-miR-422a | AC079466.1  |  |
| hsa-miR-422a | TMEM147-AS1 |  |

|              |                           |  |
|--------------|---------------------------|--|
| hsa-miR-422a | AC016590.3                |  |
| hsa-miR-422a | AC118344.1                |  |
| hsa-miR-422a | AC006486.2                |  |
| hsa-miR-422a | AC007191.1                |  |
| hsa-miR-422a | AC007228.2                |  |
| hsa-miR-422a | AC005261.3                |  |
| hsa-miR-422a | AC005261.1                |  |
| hsa-miR-422a | AC012313.5                |  |
| hsa-miR-422a | MZF1-AS1                  |  |
| hsa-miR-422a | SDCBP2-AS1                |  |
| hsa-miR-422a | AL109976.1                |  |
| hsa-miR-422a | AL121906.2                |  |
| hsa-miR-422a | AL121753.2                |  |
| hsa-miR-422a | NORAD                     |  |
| hsa-miR-422a | ZFAS1                     |  |
| hsa-miR-422a | APCDD1L-AS1               |  |
| hsa-miR-422a | AL118506.1                |  |
| hsa-miR-422a | AF127577.4                |  |
| hsa-miR-422a | LINC02246                 |  |
| hsa-miR-422a | LINC00205                 |  |
| hsa-miR-422a | GUSBP11                   |  |
| hsa-miR-422a | AP000347.2                |  |
| hsa-miR-422a | MIAT                      |  |
| hsa-miR-422a | LINC01422                 |  |
| hsa-miR-422a | AL022311.1                |  |
| hsa-miR-422a | Z95331.1                  |  |
| hsa-miR-422a | MIRLET7BHG                |  |
| hsa-miR-422a | AL117329.1                |  |
| hsa-miR-422a | Z97192.3                  |  |
| hsa-miR-422a | C22orf34                  |  |
| hsa-miR-422a | BX890604.1                |  |
| hsa-miR-422a | FAM239B                   |  |
| hsa-miR-422a | AC073529.1                |  |
| hsa-miR-422a | AC004656.1                |  |
| hsa-miR-422a | JPX                       |  |
| hsa-miR-422a | FTX                       |  |
| hsa-miR-451a | AL033528.2                |  |
| hsa-miR-451a | SNHG12                    |  |
| hsa-miR-451a | TDRKH-AS1                 |  |
| hsa-miR-451a | AL355388.2                |  |
| hsa-miR-451a | AC007743.1                |  |
| hsa-miR-451a | AC005041.3                |  |
| hsa-miR-451a | AC098820.1                |  |
| hsa-miR-451a | AC005538.2                |  |
| hsa-miR-451a | AC108673.3                |  |
| hsa-miR-451a | ZSCAN16-AS1               |  |
| hsa-miR-451a | PSMG3-AS1                 |  |
| hsa-miR-451a | AC017116.1                |  |
| hsa-miR-451a | SNHG15                    |  |
| hsa-miR-451a | POT1-AS1                  |  |
| hsa-miR-451a | AC007938.2                |  |
| hsa-miR-451a | AP000753.2                |  |
| hsa-miR-451a | AC006206.1                |  |
| hsa-miR-451a | SOX21-AS1                 |  |
| hsa-miR-451a | SLC25A21-AS1              |  |
| hsa-miR-451a | AC022167.2                |  |
| hsa-miR-451a | LINC01290                 |  |
| hsa-miR-451a | AC135050.7                |  |
| hsa-miR-451a | AC092134.2                |  |
| hsa-miR-451a | AC092127.1                |  |
| hsa-miR-451a | AC137932.1                |  |
| hsa-miR-451a | ARHGAP27P1-BPTFP1-KPNA2P3 |  |
| hsa-miR-451a | DLGAP1-AS2                |  |
| hsa-miR-451a | AC092296.1                |  |
| hsa-miR-451a | NORAD                     |  |
| hsa-miR-451a | SNHG17                    |  |
| hsa-miR-451a | AC073529.1                |  |
| hsa-miR-451a | LINC01278                 |  |
| hsa-miR-551a | LINC01128                 |  |
| hsa-miR-551a | AL031283.1                |  |
| hsa-miR-551a | AL359258.1                |  |
| hsa-miR-551a | AL390038.1                |  |
| hsa-miR-551a | RBM15-AS1                 |  |

|              |                        |  |
|--------------|------------------------|--|
| hsa-miR-551a | FALEC                  |  |
| hsa-miR-551a | AL365436.2             |  |
| hsa-miR-551a | AL365181.3             |  |
| hsa-miR-551a | AL390728.5             |  |
| hsa-miR-551a | AC009948.1             |  |
| hsa-miR-551a | AC011298.1             |  |
| hsa-miR-551a | VIPRI-AS1              |  |
| hsa-miR-551a | AC022336.2             |  |
| hsa-miR-551a | AC105285.1             |  |
| hsa-miR-551a | SLC9A3-AS1             |  |
| hsa-miR-551a | LINC01023              |  |
| hsa-miR-551a | AC008443.4             |  |
| hsa-miR-551a | SYNJ2-IT1              |  |
| hsa-miR-551a | AC147651.1             |  |
| hsa-miR-551a | DLX6-AS1               |  |
| hsa-miR-551a | STAG3L5P-PVRIG2P-PILRB |  |
| hsa-miR-551a | AC069281.2             |  |
| hsa-miR-551a | AC005229.4             |  |
| hsa-miR-551a | LINC00599              |  |
| hsa-miR-551a | EXTL3-AS1              |  |
| hsa-miR-551a | LINC01301              |  |
| hsa-miR-551a | PVT1                   |  |
| hsa-miR-551a | LINC01242              |  |
| hsa-miR-551a | NALT1                  |  |
| hsa-miR-551a | AL359878.1             |  |
| hsa-miR-551a | NUTM2B-AS1             |  |
| hsa-miR-551a | AP001972.5             |  |
| hsa-miR-551a | COLCA1                 |  |
| hsa-miR-551a | AP004609.3             |  |
| hsa-miR-551a | AP003392.3             |  |
| hsa-miR-551a | U47924.2               |  |
| hsa-miR-551a | AC025569.1             |  |
| hsa-miR-551a | AC124947.1             |  |
| hsa-miR-551a | HELLPAR                |  |
| hsa-miR-551a | AC007541.1             |  |
| hsa-miR-551a | AC026368.1             |  |
| hsa-miR-551a | AL162377.1             |  |
| hsa-miR-551a | AL096870.2             |  |
| hsa-miR-551a | AL162311.3             |  |
| hsa-miR-551a | USP3-AS1               |  |
| hsa-miR-551a | AC009041.3             |  |
| hsa-miR-551a | AC009090.4             |  |
| hsa-miR-551a | AC126696.1             |  |
| hsa-miR-551a | AC005899.4             |  |
| hsa-miR-551a | AC090627.1             |  |
| hsa-miR-551a | HOXB-AS3               |  |
| hsa-miR-551a | LINC01915              |  |
| hsa-miR-551a | AC005944.1             |  |
| hsa-miR-551a | AC008894.3             |  |
| hsa-miR-551a | ZNF582-AS1             |  |
| hsa-miR-551a | PLCG1-AS1              |  |
| hsa-miR-551a | LINC01666              |  |
| hsa-miR-551a | LINC00649              |  |
| hsa-miR-551a | LINC01547              |  |
| hsa-miR-551a | MIAT                   |  |
| hsa-miR-551a | Z93930.3               |  |
| hsa-miR-551a | AL079301.1             |  |
| hsa-miR-551a | Z93022.1               |  |
| hsa-miR-650  | AL645608.8             |  |
| hsa-miR-650  | AL391244.1             |  |
| hsa-miR-650  | AL031282.2             |  |
| hsa-miR-650  | AL953897.1             |  |
| hsa-miR-650  | LINC01772              |  |
| hsa-miR-650  | PINK1-AS               |  |
| hsa-miR-650  | SNHG3                  |  |
| hsa-miR-650  | SNHG12                 |  |
| hsa-miR-650  | AL049795.2             |  |
| hsa-miR-650  | AL139260.2             |  |
| hsa-miR-650  | SLFNL1-AS1             |  |
| hsa-miR-650  | AL139220.2             |  |
| hsa-miR-650  | LINC01144              |  |
| hsa-miR-650  | AL353898.3             |  |
| hsa-miR-650  | LINC01748              |  |

|             |                 |  |
|-------------|-----------------|--|
| hsa-miR-650 | CCDC18-AS1      |  |
| hsa-miR-650 | AL109613.1      |  |
| hsa-miR-650 | AL160006.1      |  |
| hsa-miR-650 | SLC16A1-AS1     |  |
| hsa-miR-650 | AL359915.2      |  |
| hsa-miR-650 | RP4-565E6.1     |  |
| hsa-miR-650 | AC239809.3      |  |
| hsa-miR-650 | XXyac-YX155B6.6 |  |
| hsa-miR-650 | TDRKH-AS1       |  |
| hsa-miR-650 | AC234582.1      |  |
| hsa-miR-650 | ASH1L-AS1       |  |
| hsa-miR-650 | AL365181.2      |  |
| hsa-miR-650 | AL590666.3      |  |
| hsa-miR-650 | AL121987.2      |  |
| hsa-miR-650 | GAS5            |  |
| hsa-miR-650 | C1orf220        |  |
| hsa-miR-650 | MIR181A1HG      |  |
| hsa-miR-650 | AL691482.3      |  |
| hsa-miR-650 | C1orf147        |  |
| hsa-miR-650 | MIR29B2CHG      |  |
| hsa-miR-650 | FLVCR1-AS1      |  |
| hsa-miR-650 | AL670729.1      |  |
| hsa-miR-650 | LINC01736       |  |
| hsa-miR-650 | AL512328.1      |  |
| hsa-miR-650 | AL359921.2      |  |
| hsa-miR-650 | LINC01250       |  |
| hsa-miR-650 | EIPRI-IT1       |  |
| hsa-miR-650 | ID2-AS1         |  |
| hsa-miR-650 | AC082651.1      |  |
| hsa-miR-650 | AC012073.1      |  |
| hsa-miR-650 | AC074117.1      |  |
| hsa-miR-650 | AL121658.1      |  |
| hsa-miR-650 | AC012358.1      |  |
| hsa-miR-650 | PCBP1-AS1       |  |
| hsa-miR-650 | ALMS1-IT1       |  |
| hsa-miR-650 | AC092653.2      |  |
| hsa-miR-650 | ST3GAL5-AS1     |  |
| hsa-miR-650 | LINC00342       |  |
| hsa-miR-650 | LINC01158       |  |
| hsa-miR-650 | AC068491.4      |  |
| hsa-miR-650 | PAX8-AS1        |  |
| hsa-miR-650 | AC009948.1      |  |
| hsa-miR-650 | AC009948.5      |  |
| hsa-miR-650 | TTN-AS1         |  |
| hsa-miR-650 | LINC01473       |  |
| hsa-miR-650 | AC007383.4      |  |
| hsa-miR-650 | AC012510.1      |  |
| hsa-miR-650 | AC097461.1      |  |
| hsa-miR-650 | AC073476.3      |  |
| hsa-miR-650 | AC105760.2      |  |
| hsa-miR-650 | AC104667.2      |  |
| hsa-miR-650 | AC069277.1      |  |
| hsa-miR-650 | THUMPD3-AS1     |  |
| hsa-miR-650 | AC018809.2      |  |
| hsa-miR-650 | ACVR2B-AS1      |  |
| hsa-miR-650 | AC099668.1      |  |
| hsa-miR-650 | U73166.1        |  |
| hsa-miR-650 | AC012467.2      |  |
| hsa-miR-650 | PRICKLE2-AS1    |  |
| hsa-miR-650 | FOXP1-IT1       |  |
| hsa-miR-650 | ZBTB11-AS1      |  |
| hsa-miR-650 | DUBR            |  |
| hsa-miR-650 | LINC02035       |  |
| hsa-miR-650 | GATA2-AS1       |  |
| hsa-miR-650 | NCK1-AS1        |  |
| hsa-miR-650 | AC107021.2      |  |
| hsa-miR-650 | AC080013.1      |  |
| hsa-miR-650 | AC022498.2      |  |
| hsa-miR-650 | LINC00885       |  |
| hsa-miR-650 | AC092535.1      |  |
| hsa-miR-650 | CTBP1-AS2       |  |
| hsa-miR-650 | AC016773.1      |  |
| hsa-miR-650 | LINC02447       |  |

|             |                        |  |
|-------------|------------------------|--|
| hsa-miR-650 | SLIT2-IT1              |  |
| hsa-miR-650 | AC107068.1             |  |
| hsa-miR-650 | EPHA5-AS1              |  |
| hsa-miR-650 | AC110760.2             |  |
| hsa-miR-650 | AC021127.1             |  |
| hsa-miR-650 | THAP9-AS1              |  |
| hsa-miR-650 | AC093895.1             |  |
| hsa-miR-650 | LEF1-AS1               |  |
| hsa-miR-650 | AC106895.2             |  |
| hsa-miR-650 | LINC02365              |  |
| hsa-miR-650 | SLC9A3-AS1             |  |
| hsa-miR-650 | LINC01033              |  |
| hsa-miR-650 | AC010501.1             |  |
| hsa-miR-650 | LUCAT1                 |  |
| hsa-miR-650 | AC106786.1             |  |
| hsa-miR-650 | AC106791.1             |  |
| hsa-miR-650 | SNHG4                  |  |
| hsa-miR-650 | AC116353.4             |  |
| hsa-miR-650 | AC005592.1             |  |
| hsa-miR-650 | PRR7-AS1               |  |
| hsa-miR-650 | AC145098.2             |  |
| hsa-miR-650 | AC139795.2             |  |
| hsa-miR-650 | AC138035.1             |  |
| hsa-miR-650 | SERPINB9P1             |  |
| hsa-miR-650 | AL031963.3             |  |
| hsa-miR-650 | AL138881.1             |  |
| hsa-miR-650 | AL391422.3             |  |
| hsa-miR-650 | AL590004.3             |  |
| hsa-miR-650 | MIR5689HG              |  |
| hsa-miR-650 | AL136162.1             |  |
| hsa-miR-650 | AL009031.1             |  |
| hsa-miR-650 | AL031775.1             |  |
| hsa-miR-650 | ZSCAN16-AS1            |  |
| hsa-miR-650 | HCP5                   |  |
| hsa-miR-650 | AL354740.1             |  |
| hsa-miR-650 | AL121574.1             |  |
| hsa-miR-650 | AL592158.1             |  |
| hsa-miR-650 | TRAM2-AS1              |  |
| hsa-miR-650 | LINC00472              |  |
| hsa-miR-650 | MANEA-AS1              |  |
| hsa-miR-650 | AL023581.2             |  |
| hsa-miR-650 | AL358972.1             |  |
| hsa-miR-650 | LINC00473              |  |
| hsa-miR-650 | PSMG3-AS1              |  |
| hsa-miR-650 | AC092171.5             |  |
| hsa-miR-650 | AC007128.2             |  |
| hsa-miR-650 | HOXA11-AS              |  |
| hsa-miR-650 | AC005154.1             |  |
| hsa-miR-650 | LINC00265              |  |
| hsa-miR-650 | AC118758.3             |  |
| hsa-miR-650 | LINC00174              |  |
| hsa-miR-650 | AC073335.2             |  |
| hsa-miR-650 | AC003991.1             |  |
| hsa-miR-650 | AC002076.1             |  |
| hsa-miR-650 | DLX6-AS1               |  |
| hsa-miR-650 | STAG3L5P-PVRIG2P-PILRB |  |
| hsa-miR-650 | KMT2E-AS1              |  |
| hsa-miR-650 | SLC26A4-AS1            |  |
| hsa-miR-650 | ST7-OT4                |  |
| hsa-miR-650 | AC016831.1             |  |
| hsa-miR-650 | LINC-PINT              |  |
| hsa-miR-650 | AC016831.7             |  |
| hsa-miR-650 | LINC01003              |  |
| hsa-miR-650 | LINC00689              |  |
| hsa-miR-650 | AF131215.5             |  |
| hsa-miR-650 | AF131215.4             |  |
| hsa-miR-650 | AC087821.1             |  |
| hsa-miR-650 | AC037459.3             |  |
| hsa-miR-650 | AC064807.1             |  |
| hsa-miR-650 | AC009812.3             |  |
| hsa-miR-650 | AF117829.1             |  |
| hsa-miR-650 | OTUD6B-AS1             |  |
| hsa-miR-650 | AP003476.1             |  |

|             |              |  |
|-------------|--------------|--|
| hsa-miR-650 | HAS2-AS1     |  |
| hsa-miR-650 | AC107375.1   |  |
| hsa-miR-650 | AC084125.2   |  |
| hsa-miR-650 | VLDLR-AS1    |  |
| hsa-miR-650 | AL359095.1   |  |
| hsa-miR-650 | PTPRD-AS1    |  |
| hsa-miR-650 | AL353795.2   |  |
| hsa-miR-650 | AL513165.1   |  |
| hsa-miR-650 | SMC5-AS1     |  |
| hsa-miR-650 | AL353726.2   |  |
| hsa-miR-650 | AL590705.5   |  |
| hsa-miR-650 | AL512590.3   |  |
| hsa-miR-650 | AL138756.1   |  |
| hsa-miR-650 | AL358074.1   |  |
| hsa-miR-650 | AL162586.1   |  |
| hsa-miR-650 | SLC25A25-AS1 |  |
| hsa-miR-650 | LINC00963    |  |
| hsa-miR-650 | AL138781.1   |  |
| hsa-miR-650 | C9orf163     |  |
| hsa-miR-650 | CCDC183-AS1  |  |
| hsa-miR-650 | STPG3-AS1    |  |
| hsa-miR-650 | BX255925.1   |  |
| hsa-miR-650 | AL139125.2   |  |
| hsa-miR-650 | AL157392.3   |  |
| hsa-miR-650 | ZEB1-AS1     |  |
| hsa-miR-650 | AL117336.3   |  |
| hsa-miR-650 | AL353801.3   |  |
| hsa-miR-650 | AC022532.1   |  |
| hsa-miR-650 | AL731563.3   |  |
| hsa-miR-650 | PPP3CB-AS1   |  |
| hsa-miR-650 | AC010997.4   |  |
| hsa-miR-650 | NUTM2B-AS1   |  |
| hsa-miR-650 | ADIRF-AS1    |  |
| hsa-miR-650 | NUTM2A-AS1   |  |
| hsa-miR-650 | AL391684.1   |  |
| hsa-miR-650 | LBX1-AS1     |  |
| hsa-miR-650 | AL133355.1   |  |
| hsa-miR-650 | PDCD4-AS1    |  |
| hsa-miR-650 | AL158212.3   |  |
| hsa-miR-650 | AL157832.1   |  |
| hsa-miR-650 | AL360181.2   |  |
| hsa-miR-650 | AP006621.5   |  |
| hsa-miR-650 | AC124057.1   |  |
| hsa-miR-650 | KCNQ1OT1     |  |
| hsa-miR-650 | AC091564.7   |  |
| hsa-miR-650 | TMEM9B-AS1   |  |
| hsa-miR-650 | SBF2-AS1     |  |
| hsa-miR-650 | AC124798.1   |  |
| hsa-miR-650 | AC068205.2   |  |
| hsa-miR-650 | AP001350.2   |  |
| hsa-miR-650 | SNHG1        |  |
| hsa-miR-650 | NEAT1        |  |
| hsa-miR-650 | MALAT1       |  |
| hsa-miR-650 | AP002490.1   |  |
| hsa-miR-650 | AP002761.4   |  |
| hsa-miR-650 | AP003717.1   |  |
| hsa-miR-650 | MIR4300HG    |  |
| hsa-miR-650 | AP000446.1   |  |
| hsa-miR-650 | AP000766.1   |  |
| hsa-miR-650 | COLCA1       |  |
| hsa-miR-650 | BACE1-AS     |  |
| hsa-miR-650 | MIR100HG     |  |
| hsa-miR-650 | SENCR        |  |
| hsa-miR-650 | AP003486.1   |  |
| hsa-miR-650 | AC004803.1   |  |
| hsa-miR-650 | AC125807.2   |  |
| hsa-miR-650 | AC022075.1   |  |
| hsa-miR-650 | AC023790.2   |  |
| hsa-miR-650 | AC010168.2   |  |
| hsa-miR-650 | AC026356.2   |  |
| hsa-miR-650 | AC008014.1   |  |
| hsa-miR-650 | LINC02396    |  |
| hsa-miR-650 | KRT73-AS1    |  |

|             |            |  |
|-------------|------------|--|
| hsa-miR-650 | AC012531.2 |  |
| hsa-miR-650 | LINC02381  |  |
| hsa-miR-650 | AC023794.7 |  |
| hsa-miR-650 | AC009779.2 |  |
| hsa-miR-650 | AGAP2-AS1  |  |
| hsa-miR-650 | AC020656.2 |  |
| hsa-miR-650 | HELLPAR    |  |
| hsa-miR-650 | AC007622.2 |  |
| hsa-miR-650 | NRAV       |  |
| hsa-miR-650 | LINC01089  |  |
| hsa-miR-650 | AC026362.1 |  |
| hsa-miR-650 | AC068768.1 |  |
| hsa-miR-650 | AC055713.1 |  |
| hsa-miR-650 | AL445985.1 |  |
| hsa-miR-650 | LINC00571  |  |
| hsa-miR-650 | AL162713.1 |  |
| hsa-miR-650 | TUSC8      |  |
| hsa-miR-650 | LINC00330  |  |
| hsa-miR-650 | LINC00355  |  |
| hsa-miR-650 | AL445223.1 |  |
| hsa-miR-650 | AL161431.1 |  |
| hsa-miR-650 | LINC00346  |  |
| hsa-miR-650 | AL355075.4 |  |
| hsa-miR-650 | ZFHX2-AS1  |  |
| hsa-miR-650 | AL079305.1 |  |
| hsa-miR-650 | AL079303.1 |  |
| hsa-miR-650 | AL627171.2 |  |
| hsa-miR-650 | AL358332.1 |  |
| hsa-miR-650 | LINC02331  |  |
| hsa-miR-650 | PSMA3-AS1  |  |
| hsa-miR-650 | AL161756.1 |  |
| hsa-miR-650 | VASH1-AS1  |  |
| hsa-miR-650 | AL049775.1 |  |
| hsa-miR-650 | LINC01146  |  |
| hsa-miR-650 | AL162171.3 |  |
| hsa-miR-650 | AL137230.2 |  |
| hsa-miR-650 | DICER1-AS1 |  |
| hsa-miR-650 | MEG3       |  |
| hsa-miR-650 | MEG8       |  |
| hsa-miR-650 | LINC02323  |  |
| hsa-miR-650 | AL049840.4 |  |
| hsa-miR-650 | AL928654.4 |  |
| hsa-miR-650 | AC124312.3 |  |
| hsa-miR-650 | SNHG14     |  |
| hsa-miR-650 | AC068448.1 |  |
| hsa-miR-650 | AC087516.2 |  |
| hsa-miR-650 | AC023908.2 |  |
| hsa-miR-650 | AC022405.1 |  |
| hsa-miR-650 | AC025271.4 |  |
| hsa-miR-650 | AC103691.1 |  |
| hsa-miR-650 | AC110048.2 |  |
| hsa-miR-650 | DRAIC      |  |
| hsa-miR-650 | AC015871.4 |  |
| hsa-miR-650 | MIR9-3HG   |  |
| hsa-miR-650 | ZNF710-AS1 |  |
| hsa-miR-650 | AC091078.1 |  |
| hsa-miR-650 | AC103746.1 |  |
| hsa-miR-650 | AC087477.2 |  |
| hsa-miR-650 | LINC00923  |  |
| hsa-miR-650 | AC022819.1 |  |
| hsa-miR-650 | PCSK6-AS1  |  |
| hsa-miR-650 | LINC02348  |  |
| hsa-miR-650 | Z92544.2   |  |
| hsa-miR-650 | AL008727.1 |  |
| hsa-miR-650 | AC009041.4 |  |
| hsa-miR-650 | AL133297.2 |  |
| hsa-miR-650 | AC106820.5 |  |
| hsa-miR-650 | AC106820.4 |  |
| hsa-miR-650 | AC093525.8 |  |
| hsa-miR-650 | AC093525.7 |  |
| hsa-miR-650 | AC141586.5 |  |
| hsa-miR-650 | SRRM2-AS1  |  |
| hsa-miR-650 | AC092117.1 |  |



|             |                           |  |
|-------------|---------------------------|--|
| hsa-miR-650 | AC004233.3                |  |
| hsa-miR-650 | MMP25-AS1                 |  |
| hsa-miR-650 | AC012676.5                |  |
| hsa-miR-650 | AC022167.2                |  |
| hsa-miR-650 | AC133065.3                |  |
| hsa-miR-650 | AC009121.2                |  |
| hsa-miR-650 | AC009152.1                |  |
| hsa-miR-650 | LINC02175                 |  |
| hsa-miR-650 | AC145285.2                |  |
| hsa-miR-650 | AC109460.3                |  |
| hsa-miR-650 | SLX1B-SULT1A4             |  |
| hsa-miR-650 | AC009133.2                |  |
| hsa-miR-650 | AC120114.4                |  |
| hsa-miR-650 | SLX1A-SULT1A3             |  |
| hsa-miR-650 | AC093249.6                |  |
| hsa-miR-650 | AC106886.2                |  |
| hsa-miR-650 | MIR762HG                  |  |
| hsa-miR-650 | FBXL19-AS1                |  |
| hsa-miR-650 | AC135048.1                |  |
| hsa-miR-650 | AC007599.2                |  |
| hsa-miR-650 | AC007608.4                |  |
| hsa-miR-650 | AC020978.1                |  |
| hsa-miR-650 | AC004943.2                |  |
| hsa-miR-650 | AC009078.3                |  |
| hsa-miR-650 | AC099506.1                |  |
| hsa-miR-650 | AC092127.1                |  |
| hsa-miR-650 | AC010536.1                |  |
| hsa-miR-650 | SNAI3-AS1                 |  |
| hsa-miR-650 | AC015799.1                |  |
| hsa-miR-650 | AC087500.1                |  |
| hsa-miR-650 | MIR497HG                  |  |
| hsa-miR-650 | TMEM220-AS1               |  |
| hsa-miR-650 | AC007952.4                |  |
| hsa-miR-650 | AC007952.5                |  |
| hsa-miR-650 | CCDC144NL-AS1             |  |
| hsa-miR-650 | AC087294.1                |  |
| hsa-miR-650 | AC233702.9                |  |
| hsa-miR-650 | AC104564.5                |  |
| hsa-miR-650 | AC060766.4                |  |
| hsa-miR-650 | AC080112.1                |  |
| hsa-miR-650 | AC018629.1                |  |
| hsa-miR-650 | AC060780.1                |  |
| hsa-miR-650 | ASB16-AS1                 |  |
| hsa-miR-650 | AC003102.1                |  |
| hsa-miR-650 | RUNDC3A-AS1               |  |
| hsa-miR-650 | AC138150.2                |  |
| hsa-miR-650 | AC068152.1                |  |
| hsa-miR-650 | AC103702.2                |  |
| hsa-miR-650 | AC027801.1                |  |
| hsa-miR-650 | AC005839.1                |  |
| hsa-miR-650 | AC015813.6                |  |
| hsa-miR-650 | TBC1D3P1-DHX40P1          |  |
| hsa-miR-650 | AC018628.1                |  |
| hsa-miR-650 | AC005828.4                |  |
| hsa-miR-650 | ARHGAP27P1-BPTFP1-KPNA2P3 |  |
| hsa-miR-650 | AC005332.7                |  |
| hsa-miR-650 | AC005332.6                |  |
| hsa-miR-650 | AC005332.1                |  |
| hsa-miR-650 | LINC01482                 |  |
| hsa-miR-650 | AC097641.2                |  |
| hsa-miR-650 | AC064805.1                |  |
| hsa-miR-650 | SNHG16                    |  |
| hsa-miR-650 | LINC02080                 |  |
| hsa-miR-650 | SNHG20                    |  |
| hsa-miR-650 | AC111170.3                |  |
| hsa-miR-650 | DNAH17-AS1                |  |
| hsa-miR-650 | AC087741.1                |  |
| hsa-miR-650 | AC027601.1                |  |
| hsa-miR-650 | AC110285.2                |  |
| hsa-miR-650 | AC145207.5                |  |
| hsa-miR-650 | MAFG-AS1                  |  |
| hsa-miR-650 | AC124283.5                |  |
| hsa-miR-650 | AC144831.1                |  |

|             |                |  |
|-------------|----------------|--|
| hsa-miR-650 | AP001120.1     |  |
| hsa-miR-650 | C18orf15       |  |
| hsa-miR-650 | AC090206.1     |  |
| hsa-miR-650 | AC093462.1     |  |
| hsa-miR-650 | LINC01544      |  |
| hsa-miR-650 | AC009704.2     |  |
| hsa-miR-650 | AC093330.1     |  |
| hsa-miR-650 | AC012615.1     |  |
| hsa-miR-650 | AC119403.1     |  |
| hsa-miR-650 | AC011498.2     |  |
| hsa-miR-650 | AC011444.2     |  |
| hsa-miR-650 | AC011472.5     |  |
| hsa-miR-650 | AC008543.1     |  |
| hsa-miR-650 | AC020917.4     |  |
| hsa-miR-650 | AC138430.1     |  |
| hsa-miR-650 | AC010615.2     |  |
| hsa-miR-650 | LINC01224      |  |
| hsa-miR-650 | LINC00662      |  |
| hsa-miR-650 | AC005394.2     |  |
| hsa-miR-650 | AC008555.8     |  |
| hsa-miR-650 | LINC00665      |  |
| hsa-miR-650 | AC016590.1     |  |
| hsa-miR-650 | AC016590.2     |  |
| hsa-miR-650 | AC022144.1     |  |
| hsa-miR-650 | AC008982.2     |  |
| hsa-miR-650 | AC118344.1     |  |
| hsa-miR-650 | AC008537.3     |  |
| hsa-miR-650 | AC243964.3     |  |
| hsa-miR-650 | AC243964.2     |  |
| hsa-miR-650 | GEMIN7-AS1     |  |
| hsa-miR-650 | AC007191.1     |  |
| hsa-miR-650 | AC074212.1     |  |
| hsa-miR-650 | AC006262.1     |  |
| hsa-miR-650 | AC010331.1     |  |
| hsa-miR-650 | AC010327.3     |  |
| hsa-miR-650 | CTD-2105E13.13 |  |
| hsa-miR-650 | ZNF667-AS1     |  |
| hsa-miR-650 | A1BG-AS1       |  |
| hsa-miR-650 | AC012313.1     |  |
| hsa-miR-650 | AC012313.8     |  |
| hsa-miR-650 | AL121760.1     |  |
| hsa-miR-650 | AL049712.1     |  |
| hsa-miR-650 | AL353194.1     |  |
| hsa-miR-650 | LINC00654      |  |
| hsa-miR-650 | AL049649.1     |  |
| hsa-miR-650 | MIR663AHG      |  |
| hsa-miR-650 | RALY-AS1       |  |
| hsa-miR-650 | AL136172.1     |  |
| hsa-miR-650 | OSER1-AS1      |  |
| hsa-miR-650 | AL117382.2     |  |
| hsa-miR-650 | AL031666.1     |  |
| hsa-miR-650 | LINC01273      |  |
| hsa-miR-650 | LINC01271      |  |
| hsa-miR-650 | LINC01524      |  |
| hsa-miR-650 | GNAS-AS1       |  |
| hsa-miR-650 | AL121832.3     |  |
| hsa-miR-650 | AL117379.1     |  |
| hsa-miR-650 | MIR155HG       |  |
| hsa-miR-650 | AP000688.1     |  |
| hsa-miR-650 | DSCAM-AS1      |  |
| hsa-miR-650 | AP001057.1     |  |
| hsa-miR-650 | AP001062.1     |  |
| hsa-miR-650 | LINC01694      |  |
| hsa-miR-650 | AL592528.1     |  |
| hsa-miR-650 | CECR3          |  |
| hsa-miR-650 | AC004019.18    |  |
| hsa-miR-650 | AP000553.2     |  |
| hsa-miR-650 | GUSBP1         |  |
| hsa-miR-650 | AP000347.2     |  |
| hsa-miR-650 | AP000350.6     |  |
| hsa-miR-650 | ADORA2A-AS1    |  |
| hsa-miR-650 | LINC01422      |  |
| hsa-miR-650 | AC004264.2     |  |

|             |            |  |
|-------------|------------|--|
| hsa-miR-650 | TUG1       |  |
| hsa-miR-650 | LINC01521  |  |
| hsa-miR-650 | LARGE-IT1  |  |
| hsa-miR-650 | Z82217.1   |  |
| hsa-miR-650 | Z82188.2   |  |
| hsa-miR-650 | AL022311.1 |  |
| hsa-miR-650 | AL022322.1 |  |
| hsa-miR-650 | AL021707.2 |  |
| hsa-miR-650 | AL031595.3 |  |
| hsa-miR-650 | Z95331.1   |  |
| hsa-miR-650 | AL121672.2 |  |
| hsa-miR-650 | FP325332.1 |  |
| hsa-miR-650 | Z84468.1   |  |
| hsa-miR-650 | C22orf34   |  |
| hsa-miR-650 | CHKB-AS1   |  |
| hsa-miR-650 | AC004656.1 |  |
| hsa-miR-650 | AC092198.1 |  |
| hsa-miR-650 | AC233728.1 |  |
| hsa-miR-650 | JPX        |  |
| hsa-miR-650 | FTX        |  |
| hsa-miR-650 | AL359740.1 |  |
| hsa-miR-650 | AL035425.4 |  |
| hsa-miR-650 | AL645820.1 |  |
| hsa-miR-650 | MIR503HG   |  |
| hsa-miR-650 | LINC00894  |  |
| hsa-miR-650 | TTY10      |  |
| hsa-miR-760 | LINC01128  |  |
| hsa-miR-760 | AL645608.3 |  |
| hsa-miR-760 | AL645608.1 |  |
| hsa-miR-760 | AL645608.8 |  |
| hsa-miR-760 | AL391244.1 |  |
| hsa-miR-760 | AL031847.1 |  |
| hsa-miR-760 | LINC01672  |  |
| hsa-miR-760 | LINC01759  |  |
| hsa-miR-760 | PIK3CD-AS2 |  |
| hsa-miR-760 | AL450998.2 |  |
| hsa-miR-760 | AL137798.2 |  |
| hsa-miR-760 | AL021920.3 |  |
| hsa-miR-760 | BX284668.5 |  |
| hsa-miR-760 | ZNF436-AS1 |  |
| hsa-miR-760 | AL591845.1 |  |
| hsa-miR-760 | AL050341.2 |  |
| hsa-miR-760 | SLFN1-AS1  |  |
| hsa-miR-760 | AC096540.1 |  |
| hsa-miR-760 | AL512353.1 |  |
| hsa-miR-760 | ERI3-IT1   |  |
| hsa-miR-760 | LINC01144  |  |
| hsa-miR-760 | FOXD2-AS1  |  |
| hsa-miR-760 | LINC01748  |  |
| hsa-miR-760 | AL359504.2 |  |
| hsa-miR-760 | MIR137HG   |  |
| hsa-miR-760 | AC093157.1 |  |
| hsa-miR-760 | AL359258.1 |  |
| hsa-miR-760 | AL390038.1 |  |
| hsa-miR-760 | AL160006.1 |  |
| hsa-miR-760 | AL365361.1 |  |
| hsa-miR-760 | AL390066.1 |  |
| hsa-miR-760 | RP6-42F4.1 |  |
| hsa-miR-760 | LINC01719  |  |
| hsa-miR-760 | AC244394.2 |  |
| hsa-miR-760 | AL365436.2 |  |
| hsa-miR-760 | RUSC1-AS1  |  |
| hsa-miR-760 | AL355388.2 |  |
| hsa-miR-760 | AL365181.3 |  |
| hsa-miR-760 | AL590560.2 |  |
| hsa-miR-760 | AL451074.2 |  |
| hsa-miR-760 | AL513217.1 |  |
| hsa-miR-760 | MIR29B2CHG |  |
| hsa-miR-760 | AL359551.1 |  |
| hsa-miR-760 | AL591848.3 |  |
| hsa-miR-760 | LINC01341  |  |
| hsa-miR-760 | LINC01814  |  |
| hsa-miR-760 | AC007249.2 |  |

|             |                        |  |
|-------------|------------------------|--|
| hsa-miR-760 | AC138655.1             |  |
| hsa-miR-760 | AC007744.1             |  |
| hsa-miR-760 | PCBP1-AS1              |  |
| hsa-miR-760 | LINC01102              |  |
| hsa-miR-760 | LINC01918              |  |
| hsa-miR-760 | MIR4435-2HG            |  |
| hsa-miR-760 | AC114763.1             |  |
| hsa-miR-760 | HAGLR                  |  |
| hsa-miR-760 | SATB2-AS1              |  |
| hsa-miR-760 | LINC01963              |  |
| hsa-miR-760 | AC098820.1             |  |
| hsa-miR-760 | LINC01237              |  |
| hsa-miR-760 | AC022007.1             |  |
| hsa-miR-760 | GHRLS                  |  |
| hsa-miR-760 | SH3BP5-AS1             |  |
| hsa-miR-760 | AC090948.2             |  |
| hsa-miR-760 | AC132807.1             |  |
| hsa-miR-760 | LINC01967              |  |
| hsa-miR-760 | ITGA9-AS1              |  |
| hsa-miR-760 | ACVR2B-AS1             |  |
| hsa-miR-760 | AC099329.2             |  |
| hsa-miR-760 | AC006058.1             |  |
| hsa-miR-760 | KIF9-AS1               |  |
| hsa-miR-760 | AC104447.1             |  |
| hsa-miR-760 | U73166.1               |  |
| hsa-miR-760 | AC115284.1             |  |
| hsa-miR-760 | AC096887.2             |  |
| hsa-miR-760 | PSMD6-AS2              |  |
| hsa-miR-760 | DUBR                   |  |
| hsa-miR-760 | AC022336.3             |  |
| hsa-miR-760 | AC084035.1             |  |
| hsa-miR-760 | AFAP1-AS1              |  |
| hsa-miR-760 | AC097381.1             |  |
| hsa-miR-760 | UBA6-AS1               |  |
| hsa-miR-760 | FAM198B-AS1            |  |
| hsa-miR-760 | EXOC3-AS1              |  |
| hsa-miR-760 | SLC9A3-AS1             |  |
| hsa-miR-760 | AC025171.2             |  |
| hsa-miR-760 | AC025171.1             |  |
| hsa-miR-760 | VCAN-AS1               |  |
| hsa-miR-760 | AC020923.1             |  |
| hsa-miR-760 | LUCAT1                 |  |
| hsa-miR-760 | AC008840.1             |  |
| hsa-miR-760 | AC008467.1             |  |
| hsa-miR-760 | EPB41L4A-AS1           |  |
| hsa-miR-760 | LINC01184              |  |
| hsa-miR-760 | MIR3936HG              |  |
| hsa-miR-760 | C5orf66-AS2            |  |
| hsa-miR-760 | C5orf66                |  |
| hsa-miR-760 | AC012613.2             |  |
| hsa-miR-760 | CARMN                  |  |
| hsa-miR-760 | AC008429.1             |  |
| hsa-miR-760 | AC145098.2             |  |
| hsa-miR-760 | AC008443.1             |  |
| hsa-miR-760 | LINC01011              |  |
| hsa-miR-760 | AL391422.3             |  |
| hsa-miR-760 | AL354740.1             |  |
| hsa-miR-760 | Z97832.2               |  |
| hsa-miR-760 | AL592158.1             |  |
| hsa-miR-760 | AL359711.2             |  |
| hsa-miR-760 | AL356234.2             |  |
| hsa-miR-760 | AGPAT4-IT1             |  |
| hsa-miR-760 | PACRG-AS1              |  |
| hsa-miR-760 | AC073957.2             |  |
| hsa-miR-760 | AC004540.1             |  |
| hsa-miR-760 | AC004080.6             |  |
| hsa-miR-760 | AC007285.1             |  |
| hsa-miR-760 | LINC01176              |  |
| hsa-miR-760 | AC005154.1             |  |
| hsa-miR-760 | POLR2J4                |  |
| hsa-miR-760 | LINC00174              |  |
| hsa-miR-760 | AC006330.1             |  |
| hsa-miR-760 | STAG3L5P-PVRIG2P-PILRB |  |

|             |            |  |
|-------------|------------|--|
| hsa-miR-760 | AC004014.2 |  |
| hsa-miR-760 | AC019155.2 |  |
| hsa-miR-760 | SND1-IT1   |  |
| hsa-miR-760 | PRKAG2-AS1 |  |
| hsa-miR-760 | AC006017.1 |  |
| hsa-miR-760 | PAXIPI-AS1 |  |
| hsa-miR-760 | AC144652.1 |  |
| hsa-miR-760 | AC021218.1 |  |
| hsa-miR-760 | AC100810.1 |  |
| hsa-miR-760 | AC027117.1 |  |
| hsa-miR-760 | AC090197.1 |  |
| hsa-miR-760 | MIR124-2HG |  |
| hsa-miR-760 | LINC01111  |  |
| hsa-miR-760 | AC009686.2 |  |
| hsa-miR-760 | CA3-AS1    |  |
| hsa-miR-760 | OTUD6B-AS1 |  |
| hsa-miR-760 | GASAL1     |  |
| hsa-miR-760 | PRNCR1     |  |
| hsa-miR-760 | PVT1       |  |
| hsa-miR-760 | ASAP1-IT2  |  |
| hsa-miR-760 | MINCR      |  |
| hsa-miR-760 | AC105118.1 |  |
| hsa-miR-760 | AC067930.6 |  |
| hsa-miR-760 | AC084125.2 |  |
| hsa-miR-760 | AL606807.1 |  |
| hsa-miR-760 | AL807761.4 |  |
| hsa-miR-760 | AL441992.1 |  |
| hsa-miR-760 | LINC01503  |  |
| hsa-miR-760 | LINC00963  |  |
| hsa-miR-760 | AL360004.1 |  |
| hsa-miR-760 | AL358781.1 |  |
| hsa-miR-760 | SNHG7      |  |
| hsa-miR-760 | ARRDC1-AS1 |  |
| hsa-miR-760 | AL139125.2 |  |
| hsa-miR-760 | GATA3-AS1  |  |
| hsa-miR-760 | AL157392.3 |  |
| hsa-miR-760 | C10orf25   |  |
| hsa-miR-760 | AC022532.1 |  |
| hsa-miR-760 | AC022400.7 |  |
| hsa-miR-760 | ZSWIM8-AS1 |  |
| hsa-miR-760 | AL132656.4 |  |
| hsa-miR-760 | NUTM2B-AS1 |  |
| hsa-miR-760 | LINC00858  |  |
| hsa-miR-760 | AL138921.1 |  |
| hsa-miR-760 | AL162274.3 |  |
| hsa-miR-760 | LINC01165  |  |
| hsa-miR-760 | AC137894.1 |  |
| hsa-miR-760 | AP006284.1 |  |
| hsa-miR-760 | H19        |  |
| hsa-miR-760 | IGF2-AS    |  |
| hsa-miR-760 | KCNQ1OT1   |  |
| hsa-miR-760 | LINC00958  |  |
| hsa-miR-760 | BBOX1-AS1  |  |
| hsa-miR-760 | SNHG1      |  |
| hsa-miR-760 | AP001453.1 |  |
| hsa-miR-760 | NEAT1      |  |
| hsa-miR-760 | MALAT1     |  |
| hsa-miR-760 | AP001266.1 |  |
| hsa-miR-760 | AP001157.1 |  |
| hsa-miR-760 | AP000785.1 |  |
| hsa-miR-760 | AP000757.1 |  |
| hsa-miR-760 | MIR100HG   |  |
| hsa-miR-760 | AC125807.2 |  |
| hsa-miR-760 | FAM66C     |  |
| hsa-miR-760 | AC092821.3 |  |
| hsa-miR-760 | AC009509.1 |  |
| hsa-miR-760 | AC009318.4 |  |
| hsa-miR-760 | AC068987.4 |  |
| hsa-miR-760 | AC025259.1 |  |
| hsa-miR-760 | AC068888.1 |  |
| hsa-miR-760 | AC073573.1 |  |
| hsa-miR-760 | HOXC-AS2   |  |
| hsa-miR-760 | AC025165.1 |  |

|             |             |  |
|-------------|-------------|--|
| hsa-miR-760 | AC020656.2  |  |
| hsa-miR-760 | LINC02444   |  |
| hsa-miR-760 | AC121761.2  |  |
| hsa-miR-760 | LINC02407   |  |
| hsa-miR-760 | TMPO-AS1    |  |
| hsa-miR-760 | HELLPAR     |  |
| hsa-miR-760 | AC007541.1  |  |
| hsa-miR-760 | PXN-AS1     |  |
| hsa-miR-760 | AC069234.3  |  |
| hsa-miR-760 | LINC01089   |  |
| hsa-miR-760 | AC027290.2  |  |
| hsa-miR-760 | AC026362.1  |  |
| hsa-miR-760 | AC026362.2  |  |
| hsa-miR-760 | AC117503.3  |  |
| hsa-miR-760 | AC122688.3  |  |
| hsa-miR-760 | FZD10-AS1   |  |
| hsa-miR-760 | LINC01257   |  |
| hsa-miR-760 | AC131009.3  |  |
| hsa-miR-760 | AC131212.3  |  |
| hsa-miR-760 | AC131212.4  |  |
| hsa-miR-760 | N4BP2L2-IT2 |  |
| hsa-miR-760 | DLEU1       |  |
| hsa-miR-760 | RBM26-AS1   |  |
| hsa-miR-760 | MIR17HG     |  |
| hsa-miR-760 | LINC00551   |  |
| hsa-miR-760 | SOX1-OT     |  |
| hsa-miR-760 | AL442125.1  |  |
| hsa-miR-760 | AL096870.2  |  |
| hsa-miR-760 | G2E3-AS1    |  |
| hsa-miR-760 | LINC01588   |  |
| hsa-miR-760 | FRMD6-AS1   |  |
| hsa-miR-760 | FUT8-AS1    |  |
| hsa-miR-760 | AC005519.1  |  |
| hsa-miR-760 | AL049780.1  |  |
| hsa-miR-760 | AF111167.2  |  |
| hsa-miR-760 | VASH1-AS1   |  |
| hsa-miR-760 | LINC01550   |  |
| hsa-miR-760 | MEG3        |  |
| hsa-miR-760 | MEG9        |  |
| hsa-miR-760 | DIO3OS      |  |
| hsa-miR-760 | LINC02323   |  |
| hsa-miR-760 | SNHG14      |  |
| hsa-miR-760 | ARHGAP11B   |  |
| hsa-miR-760 | AC037198.1  |  |
| hsa-miR-760 | AC020661.1  |  |
| hsa-miR-760 | AC013564.1  |  |
| hsa-miR-760 | AC100827.3  |  |
| hsa-miR-760 | LOXL1-AS1   |  |
| hsa-miR-760 | AC091230.1  |  |
| hsa-miR-760 | SNHG21      |  |
| hsa-miR-760 | LINC01586   |  |
| hsa-miR-760 | MIR9-3HG    |  |
| hsa-miR-760 | AC087284.1  |  |
| hsa-miR-760 | ZNF710-AS1  |  |
| hsa-miR-760 | IDH2-DT     |  |
| hsa-miR-760 | LINC00923   |  |
| hsa-miR-760 | AL008727.1  |  |
| hsa-miR-760 | AL133297.2  |  |
| hsa-miR-760 | AL031009.1  |  |
| hsa-miR-760 | SNHG9       |  |
| hsa-miR-760 | AC106820.2  |  |
| hsa-miR-760 | AC106820.4  |  |
| hsa-miR-760 | AC093525.8  |  |
| hsa-miR-760 | AC093525.9  |  |
| hsa-miR-760 | MMP25-AS1   |  |
| hsa-miR-760 | LCMT1-AS2   |  |
| hsa-miR-760 | AC008741.2  |  |
| hsa-miR-760 | IL21R-AS1   |  |
| hsa-miR-760 | AC002551.1  |  |
| hsa-miR-760 | AC145285.6  |  |
| hsa-miR-760 | AC009133.21 |  |
| hsa-miR-760 | AC135050.6  |  |
| hsa-miR-760 | AC026471.6  |  |

|             |                           |  |
|-------------|---------------------------|--|
| hsa-miR-760 | AC092368.3                |  |
| hsa-miR-760 | AC106779.1                |  |
| hsa-miR-760 | AC009090.5                |  |
| hsa-miR-760 | AC092378.1                |  |
| hsa-miR-760 | AC018557.1                |  |
| hsa-miR-760 | AC040160.2                |  |
| hsa-miR-760 | AC040160.1                |  |
| hsa-miR-760 | AC027682.2                |  |
| hsa-miR-760 | AC027682.3                |  |
| hsa-miR-760 | AC009022.1                |  |
| hsa-miR-760 | LINC01572                 |  |
| hsa-miR-760 | AC140912.1                |  |
| hsa-miR-760 | AC009078.3                |  |
| hsa-miR-760 | AC092718.2                |  |
| hsa-miR-760 | AC092139.3                |  |
| hsa-miR-760 | ATP2C2-AS1                |  |
| hsa-miR-760 | LINC02188                 |  |
| hsa-miR-760 | AC010531.4                |  |
| hsa-miR-760 | AC105429.1                |  |
| hsa-miR-760 | AC010536.1                |  |
| hsa-miR-760 | AC126696.2                |  |
| hsa-miR-760 | SNAI3-AS1                 |  |
| hsa-miR-760 | LINC00304                 |  |
| hsa-miR-760 | AC087392.3                |  |
| hsa-miR-760 | AC099684.2                |  |
| hsa-miR-760 | AC006435.2                |  |
| hsa-miR-760 | AC015799.1                |  |
| hsa-miR-760 | AC005696.4                |  |
| hsa-miR-760 | AC012146.1                |  |
| hsa-miR-760 | AC016876.2                |  |
| hsa-miR-760 | AC118755.2                |  |
| hsa-miR-760 | LRRRC75A-AS1              |  |
| hsa-miR-760 | AC124066.1                |  |
| hsa-miR-760 | AC010761.1                |  |
| hsa-miR-760 | AC127024.2                |  |
| hsa-miR-760 | AC015849.5                |  |
| hsa-miR-760 | AC009283.1                |  |
| hsa-miR-760 | AC067852.3                |  |
| hsa-miR-760 | RAMP2-AS1                 |  |
| hsa-miR-760 | ASB16-AS1                 |  |
| hsa-miR-760 | AC142472.1                |  |
| hsa-miR-760 | AC008105.3                |  |
| hsa-miR-760 | AC008105.1                |  |
| hsa-miR-760 | AC018521.1                |  |
| hsa-miR-760 | TBX2-AS1                  |  |
| hsa-miR-760 | AC005828.5                |  |
| hsa-miR-760 | ARHGAP27P1-BPTFP1-KPNA2P3 |  |
| hsa-miR-760 | AC097641.2                |  |
| hsa-miR-760 | AC022211.2                |  |
| hsa-miR-760 | TEN1-CDK3                 |  |
| hsa-miR-760 | SNHG16                    |  |
| hsa-miR-760 | AC111170.2                |  |
| hsa-miR-760 | LINC01993                 |  |
| hsa-miR-760 | AC087645.2                |  |
| hsa-miR-760 | AC087741.1                |  |
| hsa-miR-760 | AC120024.1                |  |
| hsa-miR-760 | BAIAP2-AS1                |  |
| hsa-miR-760 | LINC00482                 |  |
| hsa-miR-760 | AC110285.2                |  |
| hsa-miR-760 | AC139530.1                |  |
| hsa-miR-760 | LINC01895                 |  |
| hsa-miR-760 | DLGAPI-AS1                |  |
| hsa-miR-760 | AP005671.1                |  |
| hsa-miR-760 | NDUFV2-AS1                |  |
| hsa-miR-760 | AP001269.4                |  |
| hsa-miR-760 | AP005131.6                |  |
| hsa-miR-760 | AC090206.1                |  |
| hsa-miR-760 | AC090220.1                |  |
| hsa-miR-760 | AC021504.1                |  |
| hsa-miR-760 | AC090340.1                |  |
| hsa-miR-760 | AC105105.2                |  |
| hsa-miR-760 | AC105105.1                |  |
| hsa-miR-760 | AC009716.2                |  |

|             |             |  |
|-------------|-------------|--|
| hsa-miR-760 | AC018413.1  |  |
| hsa-miR-760 | AC093330.2  |  |
| hsa-miR-760 | AC139100.2  |  |
| hsa-miR-760 | AC009005.1  |  |
| hsa-miR-760 | AC005329.1  |  |
| hsa-miR-760 | AC027307.3  |  |
| hsa-miR-760 | AC027307.2  |  |
| hsa-miR-760 | AC005306.1  |  |
| hsa-miR-760 | AC092068.3  |  |
| hsa-miR-760 | AC011498.7  |  |
| hsa-miR-760 | AC104532.2  |  |
| hsa-miR-760 | ZNF561-AS1  |  |
| hsa-miR-760 | AC008764.7  |  |
| hsa-miR-760 | AC008764.10 |  |
| hsa-miR-760 | AC011447.7  |  |
| hsa-miR-760 | LINC01224   |  |
| hsa-miR-760 | AC007786.3  |  |
| hsa-miR-760 | LINC01782   |  |
| hsa-miR-760 | AC008738.7  |  |
| hsa-miR-760 | AC010485.1  |  |
| hsa-miR-760 | AC020910.4  |  |
| hsa-miR-760 | TMEM147-AS1 |  |
| hsa-miR-760 | AD001527.2  |  |
| hsa-miR-760 | LINC00665   |  |
| hsa-miR-760 | LINC01535   |  |
| hsa-miR-760 | AC011479.3  |  |
| hsa-miR-760 | LIPE-AS1    |  |
| hsa-miR-760 | AC243964.3  |  |
| hsa-miR-760 | IGFL2-AS1   |  |
| hsa-miR-760 | AC093503.1  |  |
| hsa-miR-760 | AC008895.1  |  |
| hsa-miR-760 | AC073548.1  |  |
| hsa-miR-760 | AC010331.1  |  |
| hsa-miR-760 | AC011450.1  |  |
| hsa-miR-760 | PTOV1-AS1   |  |
| hsa-miR-760 | AC010327.4  |  |
| hsa-miR-760 | AC010642.2  |  |
| hsa-miR-760 | AC012313.3  |  |
| hsa-miR-760 | A1BG-AS1    |  |
| hsa-miR-760 | LINC00261   |  |
| hsa-miR-760 | AL117381.1  |  |
| hsa-miR-760 | NORAD       |  |
| hsa-miR-760 | AL031666.2  |  |
| hsa-miR-760 | CEBPB-AS1   |  |
| hsa-miR-760 | AL109930.1  |  |
| hsa-miR-760 | APCDD1L-AS1 |  |
| hsa-miR-760 | MIR646HG    |  |
| hsa-miR-760 | AL121832.3  |  |
| hsa-miR-760 | LINC00659   |  |
| hsa-miR-760 | MIR548XHG   |  |
| hsa-miR-760 | AP000695.3  |  |
| hsa-miR-760 | TRPM2-AS    |  |
| hsa-miR-760 | LINC01547   |  |
| hsa-miR-760 | LINC00205   |  |
| hsa-miR-760 | LINC01694   |  |
| hsa-miR-760 | AJ239328.1  |  |
| hsa-miR-760 | MCM3AP-AS1  |  |
| hsa-miR-760 | AC016026.1  |  |
| hsa-miR-760 | LINC01637   |  |
| hsa-miR-760 | AC002470.2  |  |
| hsa-miR-760 | THAP7-AS1   |  |
| hsa-miR-760 | GUSBP1      |  |
| hsa-miR-760 | AP000347.2  |  |
| hsa-miR-760 | AP000350.6  |  |
| hsa-miR-760 | AC253536.3  |  |
| hsa-miR-760 | ADORA2A-AS1 |  |
| hsa-miR-760 | AL008721.2  |  |
| hsa-miR-760 | MIAT        |  |
| hsa-miR-760 | TTC28-AS1   |  |
| hsa-miR-760 | TUG1        |  |
| hsa-miR-760 | AC005005.4  |  |
| hsa-miR-760 | FP325335.1  |  |
| hsa-miR-760 | AL021707.1  |  |



|             |            |  |
|-------------|------------|--|
| hsa-miR-760 | AL031595.3 |  |
| hsa-miR-760 | AL079301.1 |  |
| hsa-miR-760 | Z82243.1   |  |
| hsa-miR-760 | Z82186.1   |  |
| hsa-miR-760 | AL117329.1 |  |
| hsa-miR-760 | FP325330.3 |  |
| hsa-miR-760 | BX890604.1 |  |
| hsa-miR-760 | FAM239B    |  |
